## Accuracy of *de novo* assembly of DNA sequences from double-digest libraries varies substantially among software

Melanie E. F. LaCava<sup>1,2</sup>, Ellen O. Aikens<sup>1,3</sup>, Libby C. Megna<sup>1,4</sup>,  
Gregg Randolph<sup>5</sup>, Charley Hubbard<sup>1,6</sup>, and C. Alex Buerkle<sup>1,6</sup>

<sup>1</sup> Program in Ecology, University of Wyoming, Laramie, WY 82071, USA

<sup>2</sup> Wildlife Genomics and Disease Ecology Lab, Department of Veterinary Sciences, University of Wyoming, Laramie, WY 82071, USA

<sup>3</sup> Wyoming Cooperative Fish and Wildlife Research Unit, Department of Zoology and Physiology, Laramie, WY 82071, USA

<sup>4</sup> Department of Zoology and Physiology, University of Wyoming, Laramie, WY 82071, USA

<sup>5</sup> microlab, University of Wyoming, Laramie, WY 82071, USA

<sup>6</sup> Department of Botany, University of Wyoming, Laramie, WY 82071, USA

Corresponding author: Melanie E. F. LaCava  
1000 E. University Ave.  
Department of Veterinary Sciences  
University of Wyoming  
Laramie, WY 82071, USA  
mlacava@uwyo.edu

Keywords: *GBS*, *RAD*, *reference genome*, *population genomics*, *indels*, *paralogs*

Running title: *De novo* assembly of double-digest libraries

## 1 Abstract

2 Advances in DNA sequencing have made it feasible to gather genomic data for non-model  
3 organisms and large sets of individuals, often using methods for sequencing subsets of the  
4 genome. Several of these methods sequence DNA associated with endonuclease restriction  
5 sites (various RAD and GBS methods). For use in taxa without a reference genome, these  
6 methods rely on *de novo* assembly of fragments in the sequencing library. Many of the  
7 software options available for this application were originally developed for other assembly  
8 types and we do not know their accuracy for reduced representation libraries. To address  
9 this important knowledge gap, we simulated data from the *Arabidopsis thaliana* and *Homo*  
10 *sapiens* genomes and compared *de novo* assemblies by six software programs that are com-  
11 monly used or promising for this purpose (ABySS, CD-HIT, Stacks, Stacks2, Velvet and  
12 VSEARCH). We simulated different mutation rates and types of mutations, and then applied  
13 the six assemblers to the simulated datasets, varying assembly parameters. We found sub-  
14 stantial variation in software performance across simulations and parameter settings. ABySS  
15 failed to recover any true genome fragments, and Velvet and VSEARCH performed poorly for  
16 most simulations. Stacks, Stacks2, and CD-HIT recovered a high proportion of true frag-  
17 ments and produced accurate assemblies of simulations containing SNPs. CD-HIT exceeded  
18 Stacks and Stacks2 in accuracy of assembly for simulations that included insertion and  
19 deletion polymorphisms. Here, we demonstrate the substantial difference in the accuracy  
20 of assemblies from different software programs and the importance of comparing assemblies  
21 that result from different parameter settings.

## 22 Introduction

23 Advances in DNA sequencing have made the laboratory portion of large studies of genomic  
24 variation among many individuals feasible and economical, even for non-model taxa (Ek-  
25 blom & Galindo, 2011; Narum *et al.*, 2013; Andrews *et al.*, 2016; Benestan *et al.*, 2016).  
26 Current research in population genomics is often based on sequencing of reduced representa-  
27 tion DNA libraries for many individuals, rather than the equivalent amount of whole genome  
28 re-sequencing for a smaller set of individuals (Buerkle & Gompert, 2013; Fumagalli, 2013).  
29 Ecological and evolutionary research in diverse systems often uses DNA sequencing to ob-  
30 tain genotypic information, regularly without a “complete” reference genome (draft genome  
31 assembly with long contiguous sequences, for the focal or a related taxon). Instead, many  
32 studies rely on *de novo* assemblies of the subset of the genome contained in reduced repre-  
33 sentation libraries to use for reference-based mapping of reads. Despite the fact that the *de*  
34 *novo* assembly is prerequisite for further analysis and has strong potential to affect reference-  
35 based assemblies and genotyping, few studies have compared the efficacy of different software  
36 for sequence assembly from reduced representation libraries, including various protocols for  
37 genotyping-by-sequencing (GBS) and restriction associated DNA (RAD) sequencing (e.g.,  
38 Baird *et al.*, 2008; Elshire *et al.*, 2011; Parchman *et al.*, 2012; Peterson *et al.*, 2012), which  
39 collectively we will refer to as GBS hereafter.

40 In this study, we used simulations of sequence reads for a population of individuals to

41 compare *de novo* assembly software programs in terms of the accuracy of the resulting as-  
42 semblies, given known locations for sequence reads within each genome. As representative,  
43 well-assembled genomes, we used the human (*H. sapiens* hereafter; GRCh38 retrieved from  
44 [genome.ucsc.edu](http://genome.ucsc.edu) in Jan. 2014, Lander *et al.*, 2001) and *Arabidopsis thaliana* (*A. thaliana*  
45 hereafter; TAIR 10 assembly, Lamesch *et al.*, 2012) genomes and their expected fragmen-  
46 tation through digestion with two restriction enzymes (EcoRI and MseI). Additionally, we  
47 investigated the sensitivity of the assemblers to parameters that are used in their algorithms,  
48 including the rate and type of mutations incorporated to simulate variation among individ-  
49 uals in a population.

50 A variety of programs have been used for *de novo* assembly of GBS data. Some software  
51 was designed specifically for assembling RAD sequences (e.g., **Stacks**; Catchen *et al.*, 2011;  
52 Rochette & Catchen, 2017). Other programs were designed for assembly of whole genomes,  
53 transcriptomes, or protein sequences, including assembling contiguous sequences (contigs)  
54 that are longer than raw reads from the sequencing instrument (e.g., **Velvet**; Zerbino &  
55 Birney, 2008). These assemblers are sometimes applied to reduced representation sequences  
56 despite being designed for a different type of data, and the appropriateness of this application  
57 has not been directly evaluated. In addition to evaluating the performance of software on  
58 simulated data, we reviewed 665 published papers to find 100 studies that reported novel  
59 data from restriction digestion of genomes with two enzymes and the *de novo* assembly of  
60 those fragments. We report the software that was used in those studies and the extent to  
61 which papers evaluated and reported different assemblies based on different software settings  
62 and parameters.

63 There are a variety of parameter options for a given assembly method. For example,  
64 the assembly module in the software **Stacks** allows users to vary over a dozen parameters,  
65 whereas the software **CD-HIT** requires users to define only a few parameters (Catchen *et al.*,  
66 2011; Li & Godzik, 2006). There is little guidance on how to choose parameter settings  
67 and the sensitivity of assemblies to parameter settings, though efforts to investigate this  
68 issue have been made (Paris *et al.*, 2017), including optimization of mismatch percentages  
69 to distinguish variation among alleles from that among paralogous loci (McCartney-Melstad  
70 *et al.*, 2019).

71 We compared six assemblers by quantifying different types of errors in their assemblies  
72 of our simulated data. We compared the completeness of the assemblies (fraction of all true  
73 genome fragments represented) and their degree of over-assembly (i.e., collapsing multicopy,  
74 paralogous loci into a single contig) and under-assembly (i.e., separating allelic variants at  
75 a single locus into different contigs).

## 76 **Methods**

### 77 **Literature review**

78 We performed a literature search using the Web of Science database to quantify the frequency  
79 of use of different assemblers in current GBS studies. Our search terms were “double digest”

80 or “genotyping by sequencing” or “restriction site-associated”. We limited the search to  
81 papers from 1 January 2012 to 18 September 2017, a period that is relevant to GBS methods  
82 and generated an adequate sample size. We retained papers that presented new GBS data,  
83 performed a library preparation method that included digestion with two enzymes, and  
84 performed *de novo* assembly. We reviewed the papers in reverse chronological order of  
85 publication date and retained the first 100 papers that met these criteria to evaluate a  
86 reasonable subset of the relevant literature. For these 100 papers, we documented the *de*  
87 *nov*o assembly software that was used and whether the authors varied assembler parameters,  
88 including percent match, k-mer length, or any other parameter.

## 89 Assembler selection

90 We selected six software programs for assessment of their performance: ABySS, CD-HIT,  
91 Stacks, Stacks2, Velvet, and VSEARCH. We chose assemblers that were presented in peer-  
92 reviewed publications, freely available, and had openly accessible source code. Additionally,  
93 assemblers were only included in the assessment if they had adequate and up-to-date user  
94 resources available online (e.g., manual, tutorial, user help forums). We also selected as-  
95semblers based on the assembly method used by the software, aiming to include a diverse  
96 set of assembly methods. Lastly, we included assemblers that were commonly used in the  
97 published literature, and therefore likely of interest to researchers currently performing *de*  
98 *nov*o assembly. The six assembly programs we selected represent variations on two cluster-  
99ing algorithms (graph-based and greedy clustering algorithms), and together these programs  
100 were used in 55% of the papers in our literature review. Although our comparison is not a  
101 complete list of assemblers meeting the desired criteria, our aim was to investigate variation  
102 in performance among a sample of currently available software.

## 103 Simulations

104 As representative genomes, we selected the *A. thaliana* ( $1.44 \times 10^8$  base pairs, including  
105 gaps and unknown bases, unambiguously mapped to chromosomes, mtDNA, and cpDNA  
106 in TAIR10) and *H. sapiens* ( $3.85 \times 10^9$  base pairs, including gaps and unknown bases,  
107 unambiguously mapped to chromosomes and mtDNA in GRCh38) genomes to evaluate to  
108 what extent genome complexity influences assembler performance. These genomes differ  
109 in total genome size and amount and structure of the repetitive content in their genomes,  
110 potentially presenting different challenges for *de novo* assembly.

111 We used ddRADseqTools version 0.42 (<https://github.com/GGFHF/ddRADseqTools>,  
112 Mora-Márquez *et al.*, 2017) to create *in silico* ddRAD digests of the *A. thaliana* and *H.*  
113 *sapiens* genomes. From the ddRADseqTools package, we used the script *rsitesearch.py* to  
114 obtain fragments from restriction sites for the commonly used EcoRI and MseI restriction  
115 enzymes within each of the reference genomes. We then used the script *simddradseq.py* to set  
116 parameters and simulate 100 bp single-end reads, including barcodes, from the genome frag-  
117 ments. Because we were not interested in investigating additional complexity introduced by  
118 PCR error, we did not simulate PCR duplicates and did not use the PCR duplicate removal

119 step in *pcrdupremoval.py*. We used *indsdemultiplexing.py* to demultiplex the simulated reads  
120 and *readstrim.py* to trim the barcodes from the reads, resulting in reads of 94 bp that all  
121 began with the EcoRI restriction site. Our wrapper functions for each simulation, modi-  
122 fied from *run\_ddradseq\_chain.sh* in ddRADseqTools, are included in the Dryad repository:  
123 <https://doi.org/10.5061/dryad.8tr03f8>.

124 We used the *in silico* ddRAD digests of *A. thaliana* and *H. sapiens* genomes to simulate  
125 sets of reads for each genome. We simulated 100 individuals for all simulations of both  
126 genomes. We set `minfragsize` = 350 and `maxfragsize` = 400 to simulate size selection  
127 of fragments between 350 and 400 bp. We set `minreadvar` = 1 and `maxreadvar` = 1 for  
128 all simulations so that read depth was approximately constant across all fragments. We set  
129 `locinum` to the number of fragments obtained by *rsitesearch.py* for each reference genome,  
130 and then set `readsnum` to a sufficiently high number that all fragments were sampled in the  
131 output reads. For *A. thaliana* we set `locinum` = 1,849 and `readsnum` = 3,698,000; for *H.*  
132 *sapiens* we set `locinum` = 45,190 and `readsnum` = 9,0380,000.

133 We generated nine sets of simulated reads per genome with varying rates and types of  
134 mutations (Table 1). We varied mutation probability, maximum number of mutations per  
135 locus, mutation type (i.e., probability of nucleotide variation [SNP], or nucleotide insertion  
136 or deletion [indel]), and maximum mutation length (for indels). The first simulation had  
137 `mutprob` set to zero, so this simulation recovered the original genome. The other eight  
138 simulations for each reference genome varied in the amount and types of mutations. We  
139 refer to the 350–400 bp reference genome sequences as ‘fragments’, sequences produced by  
140 the simulator from the fragments as ‘reads’, and sequences determined by the assemblers to  
141 be unique parts of the reference set as ‘contigs’.

## 142 Assemblers

143 We included four assemblers that use **graph-based algorithms** in our comparison: **Stacks**  
144 (version 1.46), **Stacks2** (version 2.1), **ABYSS** (version 1.3.4) and **Velvet** (version 1.1) (Catchen  
145 *et al.*, 2011; Rochette & Catchen, 2017; Simpson *et al.*, 2009; Zerbino & Birney, 2008). We  
146 evaluated both **Stacks** and **Stacks2** due to significant changes in the software related to how  
147 insertion and deletion (indel) variation is treated (changes to **Stacks2** since the version 2.1  
148 we used have not included changes to *de novo* assembly). These four assemblers apply graph  
149 theory, whereby nodes represent unique reads and edges connect nodes that have sequence  
150 segments in common. Graphs are constructed using maximum likelihood to cluster reads into  
151 contigs (Catchen *et al.*, 2011). All four assemblers rely on input parameters to vary assembly  
152 constraints, but little guidance exists for their use with GBS data, except for efforts to aid  
153 users in selecting parameters for **Stacks** and **Stacks2** (Paris *et al.*, 2017). Because each  
154 assembler includes some unique parameters, we set parameters that we were not explicitly  
155 testing to comparable values when possible. For example, in **Stacks** and **Stacks2** we set the  
156 minimum depth of coverage required to create a contig at 1 to mimic other assemblers having  
157 no rule for minimum requirement. We also allowed assemblers to optimize parameters when  
158 the option was available. **Stacks**, **Stacks2**, and a script for **Velvet** (**VelvetOptimizer**) were  
159 used to optimize k-mer length (Gladman & Seeman, 2012). **VelvetOptimizer** is substan-  
160 tially more memory intensive than simply running **Velvet** so we were unable to use it for

161 the *H. sapiens* simulations. We chose to include assemblers designed specifically for reduced  
162 representation datasets (i.e., **Stacks**, **Stacks2**), as well as assemblers designed for other  
163 applications that are sometimes utilized for reduced representation datasets (i.e., for whole  
164 genome assembly using short reads: **ABYSS**, **Velvet**). We included two assemblers, **CD-HIT**  
165 (version 4.6.6) and **VSEARCH** (version 2.4.0), that use **greedy clustering algorithms** for  
166 assembly (Li & Godzik, 2006; Rognes *et al.*, 2016). Greedy clustering algorithms group reads  
167 into clusters incrementally by optimizing similarity within contigs and dissimilarity between  
168 contigs. Although **VSEARCH** was intended for *de novo* assembly of metagenomic sequence  
169 data, it is also used for alignment and clustering in **PyRAD**, a program commonly used in  
170 GBS studies (Eaton, 2014). **CD-HIT** was developed for assembling protein sequences, but  
171 was later extended for nucleotide sequences, and it is used in the analysis pipeline **dDocent**  
172 (Puritz *et al.*, 2014). We used **dDocent**'s data reduction step that retains only one copy  
173 of each unique sequence for assembly to reduce computational time. **CD-HIT** does not, to  
174 our knowledge, permit users to vary k-mer length, so we could not test the effect of that  
175 parameter for this assembler.

## 176 **Parameter settings**

177 We varied two parameters, percent match and k-mer length, across all assemblers and sim-  
178 ulations to evaluate their influence on assembly. We selected 90%, 94%, and 98% for the  
179 minimum percent match to investigate how these interacted with allelic and paralogous  
180 variation in the simulated reads. We compared k-mer lengths of 8–31bp, as well as an  
181 assembler-optimized k-mer length, although some assemblers were unable to run with every  
182 k-mer length (Table 2). K-mer length represents the sequence length that the assembler  
183 algorithm uses to compare reads; that is, the algorithms do not consider the entire, intact  
184 sequence at once.

## 185 **Quantifying accuracy of assemblies**

186 We constructed GBS assemblies using each assembler for the nine simulated data sets for *A.*  
187 *thaliana* and *H. sapiens*. We used a custom Perl script to compare the assembled contigs with  
188 the known fragments from the in-silico digestion of genomes to determine assembly accuracy  
189 using two metrics. To evaluate how completely each assembler recovered the original genome  
190 fragments (loci), we counted the number of true genome fragments that were represented  
191 in the assembly (*completeness* criterion). We used the simulation's record of what genome  
192 fragment a simulated read had been drawn from (recorded in the information line of reads in  
193 the simulated fasta data), regardless of whether the read corresponded to the ancestral or a  
194 mutated sequence. For the completeness criterion, we counted both assembled contigs that  
195 perfectly matched simulated sequences, as well as contigs that were at least 94 base pairs  
196 in length and contained the full length of a simulated sequence, but potentially contained  
197 additional bases to accommodate indel variation. Assemblies would be incomplete if some  
198 fraction of true fragments and their corresponding ancestral or mutated sequences were not  
199 represented in the contigs, because true fragments had been incorrectly subdivided and  
200 shortened.

201 Furthermore, whereas an assembly could be a complete representation of all fragments in  
202 the genome, those fragments could be under- or over-assembled relative to the true number  
203 of unique genomic regions. Thus, we also compared the number of true fragments in the  
204 genome to the number of assembled contigs (*over-under assembly* criterion). A correct  
205 assembly would produce exactly as many contigs as there are unique fragments, regardless of  
206 mutations. An under-assembled genome would contain more contigs than there are fragments  
207 (i.e., fragments incorrectly split into more contigs than is accurate; a ratio greater than one),  
208 whereas an over-assembled genome would contain fewer contigs than there are fragments  
209 (i.e., fragments collapsed into fewer contigs than is accurate; a ratio less than one). Over-  
210 and under- assembly can significantly affect downstream analyses, and while some assembly  
211 errors can be identified and accounted for in subsequent filtering steps, the reliance on  
212 filtering to remove assembly errors is not ideal. Therefore, software that avoids both over-  
213 and under-assembly is preferable.

## 214 Results

### 215 Literature review

216 We reviewed a total of 665 papers to find 100 papers that met the desired criteria. Of the 100  
217 papers, 39 used **Stacks** (the period we reviewed preceded the release of **Stacks2**), 19 used  
218 **UNEAK**, 11 used **VSEARCH**, and 14 used one of the following assemblers: **DNASTAR SeqMan**,  
219 **dDocent** (i.e., **CD-HIT**), or **AftrRAD**. The remaining 17 papers each used a unique assembler  
220 (see Table S1). Of 100 papers, 13 reported that they varied percent match, while 12 reported  
221 that they varied other assembler parameters. None of the reviewed papers reported varying  
222 k-mer length.

### 223 Simulations

224 The *A. thaliana* genome contained 1849 GBS fragments in the 350–400 bp size class, but  
225 when we simulated 100 bp reads from these fragments and removed the 6 bp barcode from  
226 the beginning of the read, this reduced to 1813 unique DNA sequences. The *H. sapiens*  
227 genome contained 45190 fragments in the 350–400 bp size class, corresponding to 43160  
228 unique sequences when trimmed to 94 bp. Since *de novo* assemblers cannot distinguish  
229 identical sequences from different parts of the genome, we used the unique 94 bp fragments  
230 to represent the expected number of contigs in our analyses of assembler performance.

### 231 Recovery of genomes without simulated mutation

232 Across all k-mer length and percent match settings, **CD-HIT**, **Stacks**, **Stacks2**, and **VSEARCH**  
233 recovered at least 96% of the fragments from the unmutated *A. thaliana* genome (Figure 1,  
234 Table S2). **Velvet** assemblies recovered 83–95.0% of the fragments from the unmutated *A.*  
235 *thaliana* genome, depending on the k-mer length setting (Figure 1). In the larger and more

236 complex *H. sapiens* genome, CD-HIT, **Stacks**, **Stacks2** and **VSEARCH** recovered at least 87%  
237 of the fragments from the unmutated genome across all percent match and k-mer length  
238 settings (high completeness; Figure 1). Of all assemblers, CD-HIT with a percent match  
239 setting of 98% recovered the highest proportion of fragments (98.3%) from the unmutated  
240 *H. sapiens* genome (Table S3). **Velvet** recovered 17% (k-mer length=15) to 76% (k-mer  
241 length=31) of the fragments from the unmutated *H. sapiens* genome, regardless of percent  
242 match setting (Figure 1). **ABYSS** failed to recover any full-length contigs that corresponded  
243 to fragments from the unmutated *A. thaliana* and *H. sapiens* genomes (Tables S2 & S3).  
244 Instead, **ABYSS** retained contigs that corresponded to fragmented sequence reads, and re-  
245 ported a large number of "contigs" that were shorter than, and lost information relative to,  
246 the simple set of unique sequence reads. Thus, we excluded **ABYSS** from further analysis.

247 None of the assemblers recovered the exact number of contigs expected. CD-HIT, **Stacks**,  
248 **Stacks2** and **Velvet** over-assembled contigs to varying degrees (Figure 2). Assemblies from  
249 CD-HIT, **Stacks** and **Stacks2** recovered 88-98% of true fragments (contig/fragment ratios),  
250 whereas **Velvet** assemblies contained 77% (with k-mer length of 31) to 93% of the true  
251 number of fragments (k-mer length of 15), regardless of percent match setting. **VSEARCH** was  
252 the only software that under-assembled contigs when assembling the original, unmutated  
253 genomes (Figures S1 & S2). For **VSEARCH**, a k-mer length of 8 resulted in approximately the  
254 correct number of contigs, but a k-mer setting of 15 resulted in under-assembly of the *A.*  
255 *thaliana* genome, producing two times more contigs than the true number of unique fragments  
256 (Table S2). Under-assembling was more severe for **VSEARCH** with the more complex *H. sapiens*  
257 genome, resulting in over three times the number of contigs compared to the expected number  
258 (Table S3).

## 259 Sensitivity to SNPs

260 Across all simulations containing only SNPs, CD-HIT, **Stacks**, and **Stacks2** recovered a high  
261 proportion of true genome fragments (Figures S3 & S4) and produced approximately the  
262 expected number of contigs (Figures S1 & S2). CD-HIT under-assembled SNP simulations  
263 when we used a percent match parameter setting of 98%, and the magnitude of under-  
264 assembly was greatest for simulations that allowed up to 3–5 SNPs per locus (Figures S1  
265 & S2), where variation in the simulated reads was higher than variation permitted by the  
266 percent match setting. Across all SNP simulations, **Velvet** assemblies with a k-mer length of  
267 15 resulted in over-assembly (Figures S1 & S2), whereas a k-mer length of 31 resulted in more  
268 accurate assemblies, similar to those produced by CD-HIT, **Stacks**, and **Stacks2** (Figures S1  
269 & S2). **VSEARCH** assemblies of simulated *A. thaliana* data varied from slight over-assembly to  
270 considerable under-assembly depending on k-mer length and the probability of SNPs in the  
271 simulated dataset (Figure S1). **VSEARCH** assemblies of simulated *H. sapiens* data containing  
272 SNPs consistently resulted in under-assembly (Figure S2).

## 273 Sensitivity to indels

274 Across all three simulations that introduced only indels as mutations (Table 1), CD-HIT  
275 consistently recovered at least 96% of *A. thaliana* fragments and at least 87% of *H. sapiens*



276 fragments (Figures S3 & S4). CD-HIT only under-assembled with a percent match of 98%  
277 when indels were up to 3–5 base pairs in length, where variation in the simulated reads was  
278 higher than variation permitted by the percent match setting (Tables 1, S2 & S3). **Stacks**  
279 consistently recovered at least 95% of true fragments from both genomes, but **Stacks** also  
280 consistently under-assembled, with contig/fragment ratios over 1.2 (Figures S1, S2, S3, &  
281 S4). This means that although all the contigs originated from true genome fragments, more  
282 contigs were produced than expected. In contrast, **Stacks2** recovered only 71–82% of true  
283 genome fragments, but produced contig/fragment ratios of 0.90–0.97, meaning that **Stacks2**  
284 produced closer to the correct number of contigs, but fewer of these contigs were found in  
285 the simulated genome fragments (Figures S3 & S4).

286 Similar to SNP simulations, **Velvet** assemblies for indel simulations varied in accuracy  
287 across k-mer settings. A k-mer setting of 15 produced approximately as many contigs as  
288 expected, but as few as 12% of those contigs were found in the original fragments. In con-  
289 trast, a k-mer setting of 31 produced a contig/fragment ratio as low as 0.72, but a higher  
290 percentage of contigs matched true genome fragments (Figures S1, S2, S3, & S4). As with  
291 SNPs, **VSEARCH** performance varied between the *A. thaliana* and *H. sapiens* genomes. For *A.*  
292 *thaliana*, **VSEARCH** varied from slight over-assembly to considerable under-assembly depend-  
293 ing on k-mer length and the length of indels simulated (Figure S1). Similar to SNP simu-  
294 lations, all indel simulations for *H. sapiens* resulted in under-assembly when using **VSEARCH**  
295 (Figure S2).

## 296 **Sensitivity to the combination of SNPs and indels**

297 For assemblies of sequences that contained a combination of SNPs and indels (Table 1),  
298 CD-HIT, **Velvet** and **VSEARCH** performed similarly to simulations where SNPs or indels were  
299 introduced independently (Figures S1 & S2). The performance of **Stacks** with a combination  
300 of SNPs and indels, however, produced results intermediate to SNPs or indels independently.  
301 In the simulation with mostly SNPs and a few indels (Table 1), **Stacks** produced approx-  
302 imately the expected number of contigs (Figures S1 & S2). In the simulation with 50:50  
303 SNPs and indels, **Stacks** consistently under-assembled for both genomes and across percent  
304 match settings (Figure 2). The degree of under-assembly by **Stacks** increased as more in-  
305 dels were introduced to simulations (Figure 2). **Stacks2** assemblies were also intermediate  
306 for simulations with a combination of SNPs and indels compared to simulations with each  
307 mutation type independently. As the proportion of indels increased, **Stacks2** assemblies for  
308 both *A. thaliana* and *H. sapiens* were less complete, but the ratio of contigs to fragments  
309 remained close to 1 (Figures 1 & 2).

## 310 **Sensitivity to k-mer setting**

311 K-mer length had almost no effect on the proportion of true genome fragments recovered or  
312 the number of contigs produced by **Stacks** or **Stacks2** (Tables S2 & S3). However, k-mer  
313 length affected assembly outcome for both **Velvet** and **VSEARCH** across all simulations that  
314 included mutations (Figures S1, S2, S3, & S4). For **Velvet**, k-mer length affected both

315 the proportion of the true fragments recovered and the rate of over-assembly. Across all  
316 simulations for both *A. thaliana* and *H. sapiens* genomes, a k-mer length of 15 consistently  
317 reduced the completeness of assemblies when compared to assemblies of k-mer length of 31.  
318 In contrast, a k-mer length of 31 typically resulted in over-assembly from Velvet, which  
319 was more extreme in the complex *H. sapiens* genome. For VSEARCH, k-mer length had little  
320 effect on the rate of recovery of true fragments, but can lead to substantial under-assembly  
321 (Figures S1 & S2). CD-HIT does not permit users to vary k-mer length, so this parameter  
322 was not evaluated for that assembler.

### 323 Sensitivity to percent match

324 Stacks and Stacks2 were the least sensitive to varying the percent match parameter setting  
325 (Tables S2 & S3). CD-HIT and VSEARCH assemblies were affected by the percent match  
326 parameter setting in an expected fashion; for example, increasing percent match to 98%  
327 resulted in increased under-assembly for simulations that produced reads that diverged from  
328 the original fragments by more than two base pairs (Figures S1 & S2). Velvet assemblies  
329 either varied little with the percent match parameter setting (in the case of k-mer lengths of  
330 15) or varied in the opposite direction (in the case of k-mer lengths of 31); the 98% match  
331 often caused greater over-assembly than the 90% or 94% match settings (Tables S2 & S3).

## 332 Discussion

333 With any short read sequencing technology (commonly 100–250bp), there is some ambiguity  
334 in the alignment or mapping of those reads because of sequence similarity due to paralogy  
335 or allelic variation. This applies to mapping reads to a high-quality reference genome (e.g.,  
336 with *bwa*, Li *et al.*, 2010), to the *de novo* assembly of reads as investigated here for GBS data,  
337 or to the related challenges for *de novo* assembly of transcriptomes. The ambiguity due to  
338 sequence paralogy is evident in the 1.9–4.5% of GBS loci from the *A. thaliana* and *H. sapiens*  
339 genomes that were not distinguishable using 94 bp (assuming 6 bp of the 100 bp reads were  
340 used as molecular barcodes to distinguish samples). In typical molecular ecology studies,  
341 the problem is compounded by allelic variation in the sample used to construct the *de novo*  
342 reference genome. Consequently, some methods and models for identifying variants and  
343 calculating genotype likelihoods use mapping quality of reads (e.g., FreeBayes; Garrison  
344 & Marth, 2012), or use filtering steps to remove sites with low mapping quality scores.  
345 Longer reads, or pairs of reads that together are both longer and potentially separated in  
346 the genome by some length, will have a higher chance of mapping uniquely, but also have a  
347 higher chance of containing nucleotide variants relative to the reference genome or the alleles  
348 of other individuals. Thus, the problem of correctly mapping sequences to a reference or *de*  
349 *novovo* assembly is general and not restricted to GBS data. In this study we have focused on the  
350 assembly problem in the context of GBS, because of the method's common usage (reviewed  
351 in Ekblom & Galindo, 2011; Narum *et al.*, 2013; Andrews *et al.*, 2016; Benestan *et al.*, 2016)  
352 and its potentially attractive place in the trade-offs that exist among: 1) completeness of  
353 genome coverage (low for GBS, relative to whole genome sequencing [WGS]), 2) depth of

354 sequencing at locus (can be optimized, potentially high relative to WGS; Buerkle & Gompert,  
355 2013; Fumagalli, 2013), and 3) numbers of individuals (can be optimized, potentially high  
356 relative to WGS) for a finite amount of sequencing. Despite legitimate concerns about the  
357 adequacy of genome coverage by GBS-like methods for certain questions and in some systems  
358 (Lowry *et al.*, 2016), for many applications in population genomics GBS-like methods are  
359 likely to remain attractive for some time (McKinney, 2016). Whereas several studies have  
360 examined the consequences of laboratory and bioinformatic methods for variant identification  
361 and other downstream analyses (Shafer *et al.*, 2017; Flanagan & Jones, 2018; Warmuth &  
362 Ellegren, 2019), this investigation fills a gap in knowledge regarding *de novo* assembly, a  
363 foundational step in analysis.

364 Our literature review of 100 recently published papers indicates that **Stacks** has been  
365 the most commonly used *de novo* assembler for GBS data (39 of the reviewed studies), but  
366 also that a large variety of software programs are used. Our comparative simulation study  
367 showed that **Stacks** (and **Stacks2**) recovered true genomes well in the absence of allelic  
368 variation, but did less well than **CD-HIT** (used in only 4 of 100 reviewed papers) for both  
369 the *A. thaliana* and *H. sapiens* genomes when mutations were present (Table 3). In par-  
370 ticular, insertion and deletion polymorphisms caused under-assembly of reads for **Stacks**  
371 (as previously demonstrated by Puritz *et al.*, 2014) and a failure to recover a substantial  
372 fraction of true genome fragments for **Stacks2** (presumably because polymorphisms led to  
373 fragmentation of contiguous sequences in the assemblies). **CD-HIT** was the only assembler  
374 that across simulations consistently recovered a high proportion of true genome fragments  
375 and its assemblies typically were close to the original genome fragments (with the expected  
376 exception in assemblies with a 98% minimum match percentage separating, in which allelic  
377 variants with greater than 2% divergence were placed into separate contigs). Two of the other  
378 assemblers we considered, **Velvet** (used in 1 of 100 reviewed papers) and **VSEARCH** (used in  
379 11 of 100 reviewed papers), either performed relatively well at recovering all genome frag-  
380 ments, or at assembling reads into the correct number of genome fragments, but not both.  
381 Somewhat dependent on the k-mer setting and the simulation, **Velvet** assemblies failed to  
382 recover a substantial fraction of true fragments (sometimes with counter-intuitive sensitivity  
383 to assembler settings), yet over-assembled those fragments only modestly. Whereas **VSEARCH**  
384 assemblies recovered a high fraction of the true genome fragments across simulations, typ-  
385 ically the assemblies were drastically under-assembled, particularly for the human genome.  
386 Finally, **ABYSS** was poorly suited to *de novo* assembly of GBS reads (it was not used in any  
387 of the 100 reviewed studies), in that it resulted in contigs that were exclusively shorter than  
388 the original reads and its assemblies did not contain any true genome fragments.

389 We found that assembly method did not predict assembler performance in any consistent  
390 manner (Table 3). We included software that used either graph-based algorithms or greedy-  
391 clustering algorithms, and assemblers in each category varied in their performance. The  
392 highest performing assemblers, **CD-HIT** and **Stacks2**, used different algorithms, suggesting  
393 that assembly algorithm is not a useful metric to select software for *de novo* assembly of  
394 GBS data.

395 For the top performing assemblers, **CD-HIT** and **Stacks2**, the challenges to obtaining cor-  
396 rect assemblies were as expected: allelic polymorphism due to indel variation at a locus likely  
397 led to assembly of shorter tracts of true genome fragments into contigs (**Stacks2**; see Figures

398 S3 S4), and sequence divergence among paralogs and alleles made assemblies appropriately  
399 sensitive to the minimum percentage match of sequences within a contig. The choice of mini-  
400 mum match percentage that optimizes over- versus under-assembly will remain a problem for  
401 *de novo* assembly until read lengths become much longer than paralogous sequences (allow-  
402 ing them to be placed uniquely in the genome). If not recognized, under- and over-assembly  
403 affect downstream analyses, including estimates of population heterozygosity and differentia-  
404 tion (Willis *et al.*, 2017). Of the two, over-assembly is likely preferable for many genomes, as  
405 its errors involve closely related, paralogous sequences, which are expected to be rarer than  
406 comparable allelic variation at individual loci. Downstream filtering of loci from population  
407 samples may identify likely over-assembled paralogs (O’Leary *et al.*, 2018), though limiting  
408 over- and under-assembly from the onset is likely desirable. This post-assembly filtering in-  
409 cludes excluding loci based on the distribution of read depth across loci and on improbably  
410 high heterozygosity given the allele frequencies at a locus (McKinney *et al.*, 2017). Ideally,  
411 this filtering would be combined with the systematic analysis and comparison of *de novo*  
412 assemblies using different percent matches (Willis *et al.*, 2017; McCartney-Melstad *et al.*,  
413 2019). Tools and methods are available to compare assemblies obtained under different dif-  
414 ferent percent matches (and other settings; Paris *et al.*, 2017; Rochette & Catchen, 2017;  
415 McCartney-Melstad *et al.*, 2019) and these should likely become a standard part of popu-  
416 lation genomics based on *de novo* assemblies. Our study indicates CD-HIT is a good choice  
417 among currently available programs for *de novo* assembly with varying match percentages,  
418 and draws attention to the substantial differences among methods that will be beneficial in  
419 evaluating new tools for *de novo* assembly of GBS sequences (Nadukkalam Ravindran *et al.*,  
420 2019).

## 421 Data Accessibility

422 Simulated reads, assembler outputs, and scripts for simulations, assembly, and analysis are  
423 available from the Dryad Digital Repository: <https://doi.org/10.5061/dryad.8tr03f8>.

## 424 Author Contributions

425 EOA conducted simulations and compiled results. CAB wrote the Perl scripts to compare  
426 assemblies to simulated data, conducted the literature review, and performed the CD-HIT  
427 assemblies. CH performed the VSEARCH assemblies. ML performed the Stacks, Stacks2,  
428 and ABySS assemblies and conducted the literature review. LCM conducted simulations. GR  
429 performed Velvet assemblies. All authors wrote and reviewed the manuscript.

## 430 Acknowledgements

431 This project was initiated as part of a computational biology practicum course taught  
432 by CAB. All computing was done with the support of the University of Wyoming’s Ad-  
433 vanced Research Computing Center, on its IBM System X clusters, Mount Moran ([http:](http://)

434 //n2t.net/ark:/85786/m4159c) and Teton (<https://doi.org/10.15786/M2FY47>). EOA  
435 was supported by the National Science Foundation Graduate Research Fellowship Program  
436 and the Wyoming NASA Space Grant Consortium (NASA Grant #NNX15AI08H). MEFL  
437 was supported by the University of Wyoming Program in Ecology and her major advisor  
438 Holly Ernest's Wyoming Excellence Chair funds. T. Parchman provided helpful feedback at  
439 several stages of the project and provided valuable comments on a draft of the manuscript.  
440 C. Nice also provided valuable comments on a draft of the manuscript.

## 441 References

- 442 Andrews KR, Good JM, Miller MR, Luikart G, Hohenlohe PA (2016) Harnessing the power  
443 of RADseq for ecological and evolutionary genomics. *Nature Reviews Genetics*, **17**, 81–92.
- 444 Baird NA, Etter PD, Atwood TS, *et al.* (2008) Rapid SNP discovery and genetic mapping  
445 using sequenced RAD markers. *PLoS ONE*, **3**, e3376.
- 446 Benestan LM, Ferchaud AL, Hohenlohe PA, *et al.* (2016) Conservation genomics of natural  
447 and managed populations: Building a conceptual and practical framework. *Molecular  
448 Ecology*, **25**, 2967–2977.
- 449 Buerkle CA, Gompert Z (2013) Population genomics based on low coverage sequencing: how  
450 low should we go? *Molecular Ecology*, **22**, 3028–3035.
- 451 Catchen JM, Amores A, Hohenlohe P, Cresko W, Postlethwait JH (2011) Stacks: Building  
452 and genotyping loci de novo from short-read sequences. *G3: Genes, Genomes, Genetics*,  
453 **1**, 171–182.
- 454 Eaton DAR (2014) PyRAD: assembly of *de novo* radseq loci for phylogenetic analyses.  
455 *Bioinformatics*, **30**, 1844–1849.
- 456 Ekblom R, Galindo J (2011) Applications of next generation sequencing in molecular ecology  
457 of non-model organisms. *Heredity*, **107**, 1–15.
- 458 Elshire RJ, Glaubitz JC, Sun Q, *et al.* (2011) A robust, simple genotyping-by-sequencing  
459 (GBS) approach for high diversity species. *PLoS ONE*, **6**, e19379.
- 460 Flanagan SP, Jones AG (2018) Substantial differences in bias between single-digest and  
461 double-digest RAD-seq libraries: A case study. *Molecular Ecology Resources*, **18**, 264–  
462 280.
- 463 Fumagalli M (2013) Assessing the effect of sequencing depth and sample size in population  
464 genetics inferences. *PLoS ONE*, **8**, 1–11.
- 465 Garrison E, Marth G (2012) Haplotype-based variant detection from short-read sequencing.  
466 *arXiv preprint arXiv:1207.3907*.
- 467 Gladman S, Seeman T (2012) *Velvet Optimizer*. [https://github.com/tseemann/  
468 VelvetOptimizer](https://github.com/tseemann/VelvetOptimizer).

- 469 Lamesch P, Berardini TZ, Li D, *et al.* (2012) The Arabidopsis information resource (TAIR):  
470 improved gene annotation and new tools. *Nucleic Acids Research*, **40**, D1202–D1210.
- 471 Lander E, Linton L, Birren B, *et al.* (2001) Initial sequencing and analysis of the human  
472 genome. *Nature*, **409**, 860–921.
- 473 Li R, Zhu H, Ruan J, *et al.* (2010) De novo assembly of human genomes with massively  
474 parallel short read sequencing. *Genome Research*, **20**, 265–272.
- 475 Li W, Godzik A (2006) Cd-hit: A fast program for clustering and comparing large sets of  
476 protein or nucleotide sequences. *Bioinformatics*, **22**, 1658–1659.
- 477 Lowry DB, Hoban S, Kelley JL, *et al.* (2016) Breaking RAD: An evaluation of the utility  
478 of restriction site associated DNA sequencing for genome scans of adaptation. *Molecular  
479 Ecology Resources*, pp. n/a–n/a.
- 480 Lu F, Lipka AE, Glaubitz J, *et al.* (2013) Switchgrass Genomic Diversity, Ploidy, and Evo-  
481 lution: Novel Insights from a Network-Based SNP Discovery Protocol. *PLoS Genetics*,  
482 **9**.
- 483 McCartney-Melstad E, Gidi M, Shaffer HB (2019) An empirical pipeline for choosing the  
484 optimal clustering threshold in RADseq studies. *Molecular Ecology Resources*, **0**.
- 485 McKinney GJ (2016) RADseq provides unprecedented insights into molecular ecology and  
486 evolutionary genetics: comment on Breaking RAD by Lowry *et al.* (2016). *Molecular  
487 Ecology Resources*, p. 4.
- 488 McKinney GJ, Waples RK, Seeb LW, Seeb JE (2017) Paralogs are revealed by proportion of  
489 heterozygotes and deviations in read ratios in genotyping-by-sequencing data from natural  
490 populations. *Molecular Ecology Resources*, **17**, 656–669.
- 491 Mora-Márquez F, García-Olivares V, Emerson BC, López de Heredia U (2017) DDRADSE-  
492 QTOOLS: a software package for in silico simulation and testing of double-digest RADseq  
493 experiments. *Molecular Ecology Resources*, **17**, 230–246.
- 494 Nadukkalam Ravindran P, Bentzen P, Bradbury IR, Beiko RG (2019) RADProc: A com-  
495 putationally efficient de novo locus assembler for population studies using RADseq data.  
496 *Molecular Ecology Resources*, **19**, 272–282.
- 497 Narum SR, Buerkle CA, Davey JW, Miller MR, Hohenlohe PA (2013) Genotyping-by-  
498 sequencing in ecological and conservation genomics. *Molecular Ecology*, **22**, 2841–2847.
- 499 O’Leary SJ, Puritz JB, Willis SC, Hollenbeck CM, Portnoy DS (2018) These aren’t the loci  
500 you’e looking for: Principles of effective SNP filtering for molecular ecologists. *Molecular  
501 Ecology*, **27**, 3193–3206.
- 502 Parchman TL, Gompert Z, Mudge J, Schilkey F, Benkman CW, Buerkle CA (2012) Genome-  
503 wide association genetics of an adaptive trait in lodgepole pine. *Molecular Ecology*, **21**,  
504 2991–3005.

- 505 Paris JR, Stevens JR, Catchen JM (2017) Lost in parameter space: A road map for stacks.  
506 *Methods in Ecology and Evolution*, **8**, 1360–1373.
- 507 Peterson BK, Weber JN, Kay EH, Fisher HS, Hoekstra HE (2012) Double digest RADseq:  
508 An inexpensive method for de novo SNP discovery and genotyping in model and non-model  
509 species. *PLoS ONE*, **7**, e37135.
- 510 Puritz JB, Hollenbeck CM, Gold JR (2014) dDocent: a RADseq, variant-calling pipeline  
511 designed for population genomics of non-model organisms. *PeerJ*, **2**, e431.
- 512 Rochette NC, Catchen JM (2017) Deriving genotypes from RAD-seq short-read data using  
513 Stacks. *Nature Protocols*, **12**, 2640–2659.
- 514 Rognes T, Flouri T, Nichols B, Quince C, Mahé F (2016) VSEARCH: a versatile open source  
515 tool for metagenomics. *PeerJ*, **4**, e2584.
- 516 Shafer AB, Peart CR, Tusso S, *et al.* (2017) Bioinformatic processing of RAD-seq data  
517 dramatically impacts downstream population genetic inference. *Methods in Ecology and*  
518 *Evolution*, **8**, 907–917.
- 519 Simpson JT, Wong K, Jackman SD, Schein JE, Jones SJM (2009) ABySS: A parallel assem-  
520 bler for short read sequence data ABySS : A parallel assembler for short read sequence  
521 data. *Genome Research*, **19**, 1117–1123.
- 522 Sovic MG, Fries AC, Gibbs HL (2015) AftrRAD: A pipeline for accurate and efficient de  
523 novo assembly of RADseq data. *Molecular Ecology Resources*, **15**, 1163–1171.
- 524 Warmuth VM, Ellegren H (2019) Genotype-free estimation of allele frequencies reduces bias  
525 and improves demographic inference from radseq data. *Molecular Ecology Resources*, **19**,  
526 586–596.
- 527 Willis SC, Hollenbeck CM, Puritz JB, Gold JR, Portnoy DS (2017) Haplotyping RAD loci:  
528 an efficient method to filter paralogs and account for physical linkage. *Molecular Ecology*  
529 *Resources*, **17**, 955–965.
- 530 Zerbino DR, Birney E (2008) Velvet : Algorithms for *de novo* short read assembly using de  
531 Bruijn graphs. *Genome Research*, **18**, 821–829.

Table 1: Parameter settings for *in silico* restriction enzyme digestions and simulated reads for GBS using ddRADseqTools (Mora-Márquez *et al.*, 2017). The parameter `mutprob` sets the probability that a base pair in the locus will mutate. The maximum mutations allowed per locus is set by `locusmaxmut`. The probability that a mutation will be an insertion or deletion (indel) rather than a SNP is set by `indelprob`. The maximum length in base pairs of the indels is set by `maxindelsize`. We simulated reads for both the *A. thaliana* and *H. sapiens* reference genomes using each of these nine parameter combinations.

| Simulation Name         | Description                             | <code>mutprob</code> | <code>locusmaxmut</code> | <code>indelprob</code> | <code>maxindelsize</code> |
|-------------------------|-----------------------------------------|----------------------|--------------------------|------------------------|---------------------------|
| Original genome         | No mutation in homozygous genome        | 0                    | 3                        | 0                      | 1                         |
| A few SNPs              | SNPs only, at a low probability         | 0.1                  | 3                        | 0                      | 1                         |
| More SNPs               | SNPs only, at high probability          | 0.2                  | 3                        | 0                      | 1                         |
| Multiple SNPs per locus | High number of mutations per locus      | 0.1                  | 5                        | 0                      | 1                         |
| Mostly SNPs, few indels | Most mutations are SNPs, 10% indels     | 0.1                  | 3                        | 0.1                    | 1                         |
| 50:50 SNPs:indels       | Half of mutations are SNPs, half indels | 0.1                  | 3                        | 0.5                    | 1                         |
| Only 1 bp indels        | Mutations are mostly 1 bp indels        | 0.1                  | 3                        | 0.99                   | 1                         |
| 1-3 bp indels           | Mutations are mostly 1-3 bp indels      | 0.1                  | 3                        | 0.99                   | 3                         |
| 1-5 bp indels           | Mutations are mostly 1-5 bp indels      | 0.1                  | 3                        | 0.99                   | 5                         |

Table 2: Percent match and k-mer length values tested for each assembler. We tested a range of parameter values possible for each assembler. We also constructed assemblies using the assembler-optimized parameter values, or if the assembler did not have an optimization routine, we used the defaults. Optimized or default parameter values are in bold. \*Note that for Velvet, only the *A. thaliana* simulations had optimized k-mer length because the attempted optimization of *H. sapiens* simulations exceeded available computational resources.

| Assembler | K-mer length              | Percent match |
|-----------|---------------------------|---------------|
| ABySS     | 15, 31, <b>optimized</b>  | 90, 94, 98    |
| CD-HIT    | NA                        | 90, 94, 98    |
| Stacks    | 15, 31, <b>optimized</b>  | 90, 94, 98    |
| Stacks2   | 15, 31, <b>optimized</b>  | 90, 94, 98    |
| Velvet    | 15, 31, <b>optimized*</b> | 90, 94, 98    |
| VSEARCH   | <b>8 (default)</b> , 15   | 90, 94, 98    |



Table 3: A summary of assembler performance. Assemblers are compared based on recovery of the original genome, assembly outcomes when presented with simulated data with differing degrees of mutations arising from SNPs and indels, and the impact of varying the k-mer and percent match parameter settings.

| Assembler | Genome recovery | Assembly of SNPs | Assembly of indels | Sensitivity to k-mer   | Sensitivity to % match |
|-----------|-----------------|------------------|--------------------|------------------------|------------------------|
| ABYSS     | Worst           | NA               | NA                 | NA                     | NA                     |
| CD-HIT    | Best            | Best             | Best               | NA                     | Sensitive              |
| Stacks    | Best            | Best             | Poor               | Relatively insensitive | Relatively insensitive |
| Stacks2   | Best            | Best             | Poor               | Relatively insensitive | Relatively insensitive |
| Velvet    | Poor            | Mixed            | Mixed              | Very sensitive         | Sensitive              |
| VSEARCH   | Mixed           | Worst            | Worst              | Very sensitive         | Sensitive              |

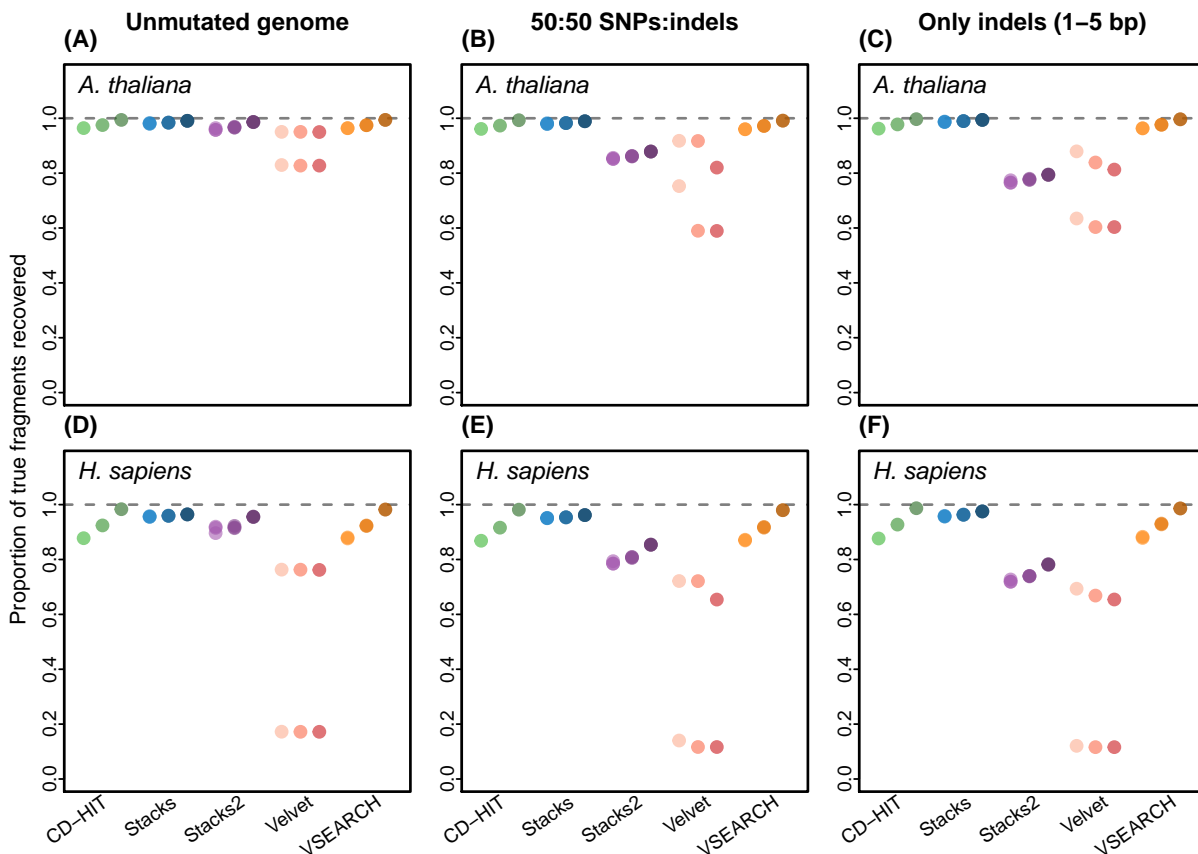

Figure 1: The completeness of assemblies in simulations of unmutated genomes (A, D), in simulations of an equal number of SNPs and indels (B, E), and simulations of 1–5 base pair indels (C, F). Simulations were derived from the *A. thaliana* (A–C) and *H. sapiens* (D–F) genomes. Completeness was calculated as the proportion of contigs that matched original genome fragments. A value less than 1 indicates that some of the assembled contigs were not found in the genome fragments. Values are reported for five assemblers: CD-HIT (green), Stacks (blue), Stacks2 (purple), Velvet (pink) and VSEARCH (orange). The hue of each color corresponds to the percent match parameter setting used in the assembly, with light hues corresponding to 90% match, medium hues corresponding to 94% match, and dark hues corresponding to 98% match. Assemblers have multiple dots in the same hue when k-mer length affected assembly outcome (see Tables S2 & S3 for details).

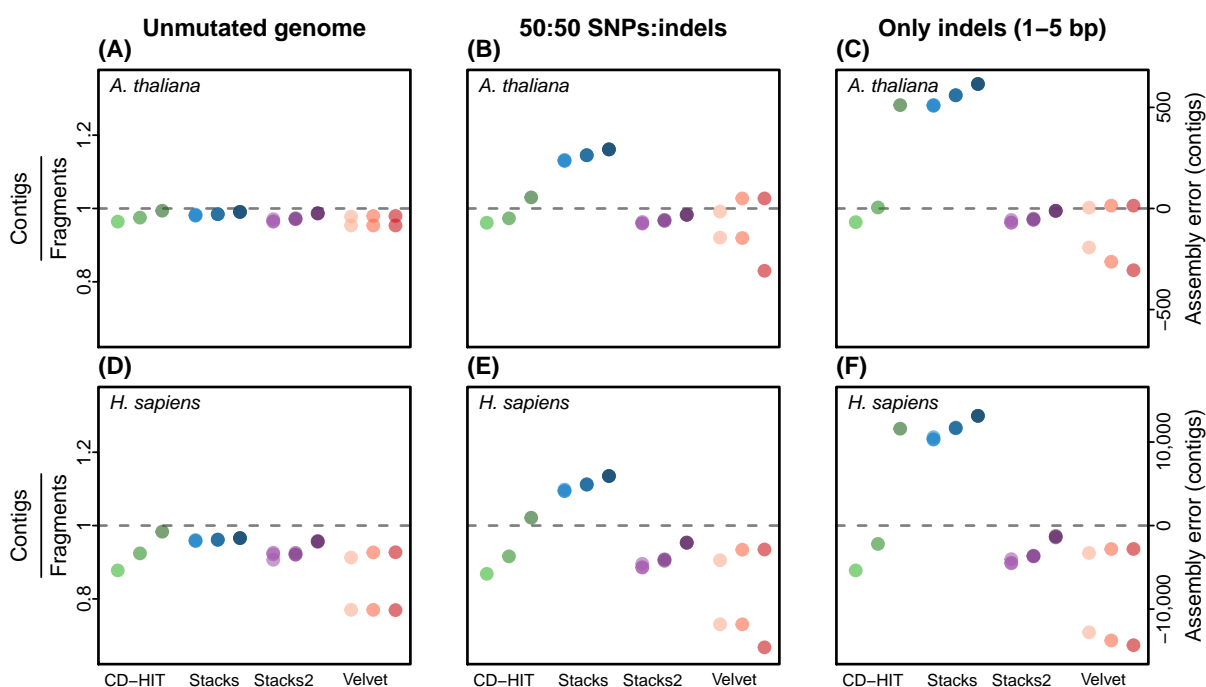

Figure 2: Measures of over- and under-assembly in simulations of unmutated genomes (A, D), in simulations of an equal number of SNPs and indels (B, E), and simulations of 1–5 base pair indels (C, F). Simulations were derived from the *A. thaliana* (A–C) and the *H. sapiens* (D–F) genomes. Over- and under-assembly are presented by the ratio of assembled contigs to true genome fragments (left vertical axis) and by absolute numbers (right vertical axis). A contigs:fragments ratio greater than one represents under-assembly and a ratio less than one represents over-assembly. Assembly results are shown for CD-HIT (green), **Stacks** (blue), **Stacks2** (purple) and **Velvet** (pink) with variable percent match (light hues = 90%, medium hues = 94%, dark hues = 98%). Assemblers have multiple dots in the same hue when k-mer length affected assembly outcome (see Tables S2 & S3 for details). **VSEARCH** was omitted because its under-assembly was so much greater than other software (**VSEARCH** is included in Figures S1 & S2).

532 **Supplementary Material**

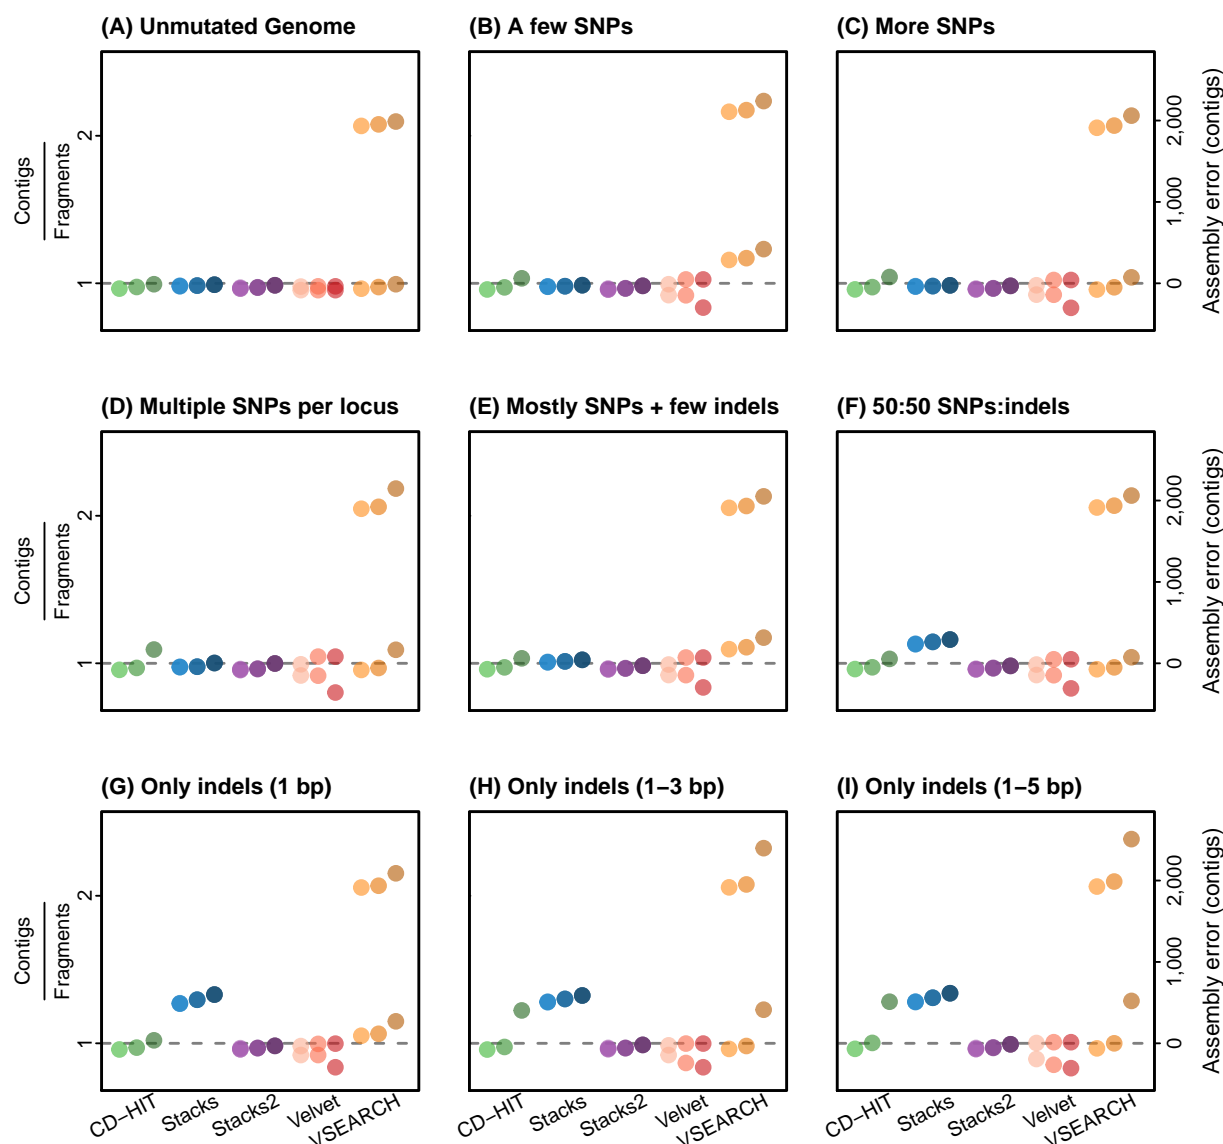

Figure S1: Performance of CD-HIT (green), Stacks (blue), Stacks2 (purple), Velvet (pink), and VSEARCH (orange) on all nine simulations of the *A. thaliana* genome (panes A–I). The ratio of contigs produced by each assembler to the number of unique fragments is used to estimate the degree of under- or over-assembly, with values greater than one representing under-assembly and values less than one representing over-assembly. The second y-axis displays the number of mis-assembled contigs, with positive values representing the number of contigs that are under-assembled and negative values representing the number of contigs that are over-assembled. Perfect assembly, a value of 1, is represented by the gray dashed line. Percent match values used for the assemblies are represented by hue: 90% (light), 94% (medium), and 98% (dark). Assemblers have multiple dots in the same hue when k-mer length affected assembly outcome (see Table S2 for details).

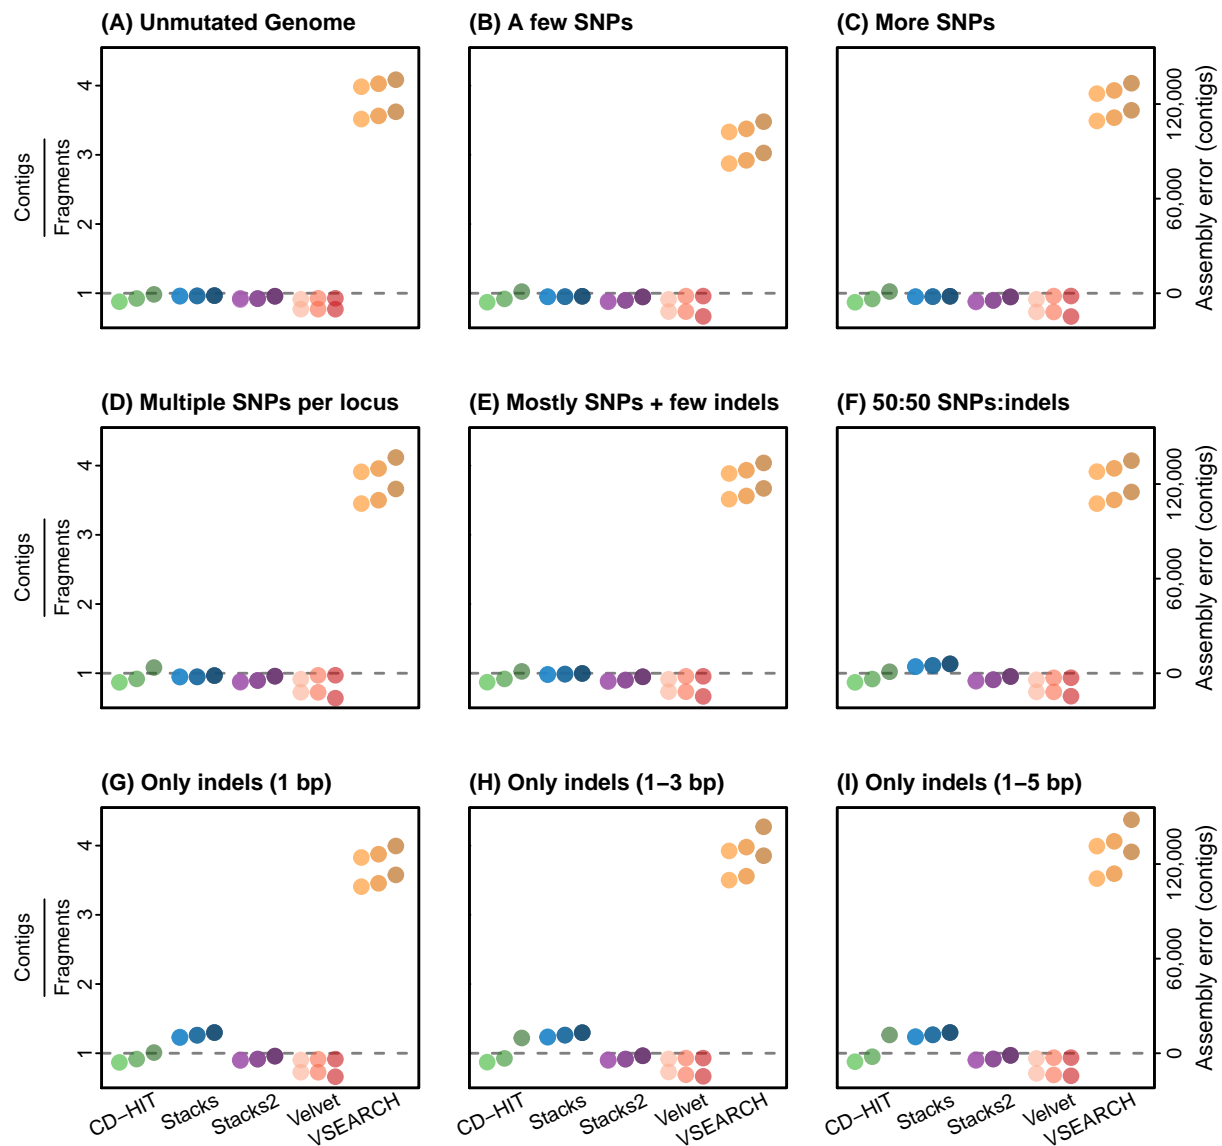

Figure S2: Performance of CD-HIT (green), Stacks (blue), Stacks2 (purple), Velvet (pink), and VSEARCH (orange) on all nine simulations of the *H. sapiens* genome (panes A–I). The ratio of contigs produced by each assembler to the number of unique fragments is used to estimate the degree of under- or over-assembly, with values greater than one representing under-assembly and values less than one representing over-assembly. The second y-axis displays the number of mis-assembled contigs, with positive values representing the number of contigs that are under-assembled and negative values representing the number of contigs that are over-assembled. Perfect assembly, a value of 1, is represented by the gray dashed line. Percent match values used for the assemblies are represented by hue: 90% (light), 94% (medium), and 98% (dark). Assemblers have multiple dots in the same hue when k-mer length affected assembly outcome (see Table S3 for details).

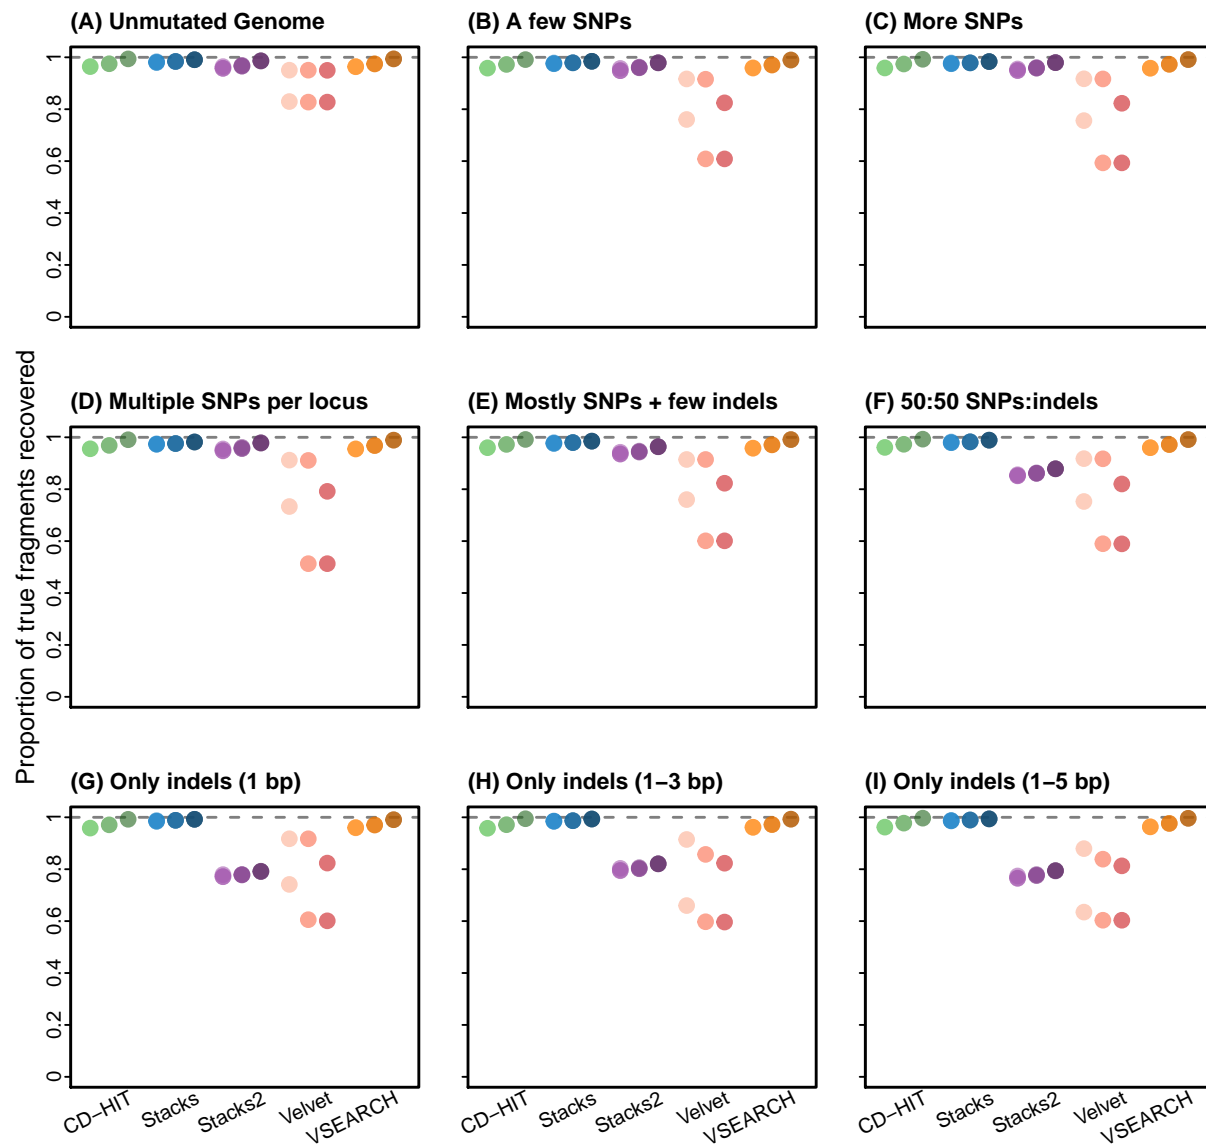

Figure S3: The completeness of assemblies in various simulations (A-I) derived from the *A. thaliana* genome. Completeness was calculated as the proportion of contigs that exactly matched original genome fragments. A value less than 1 indicates that some of the contigs produced were not found in the genome fragments. CD-HIT is green, **Stacks** is blue, **Stacks2** is purple, **Velvet** is pink, and **VSEARCH** is orange. The impact of varying the percent match parameter setting is represented by the gradient in the hue of assembler-specific colors (light hue = 90%, medium hue=94% and dark hue=98% match). Assemblers have multiple dots in the same hue when k-mer length affected assembly outcome (see Table S2 for details).

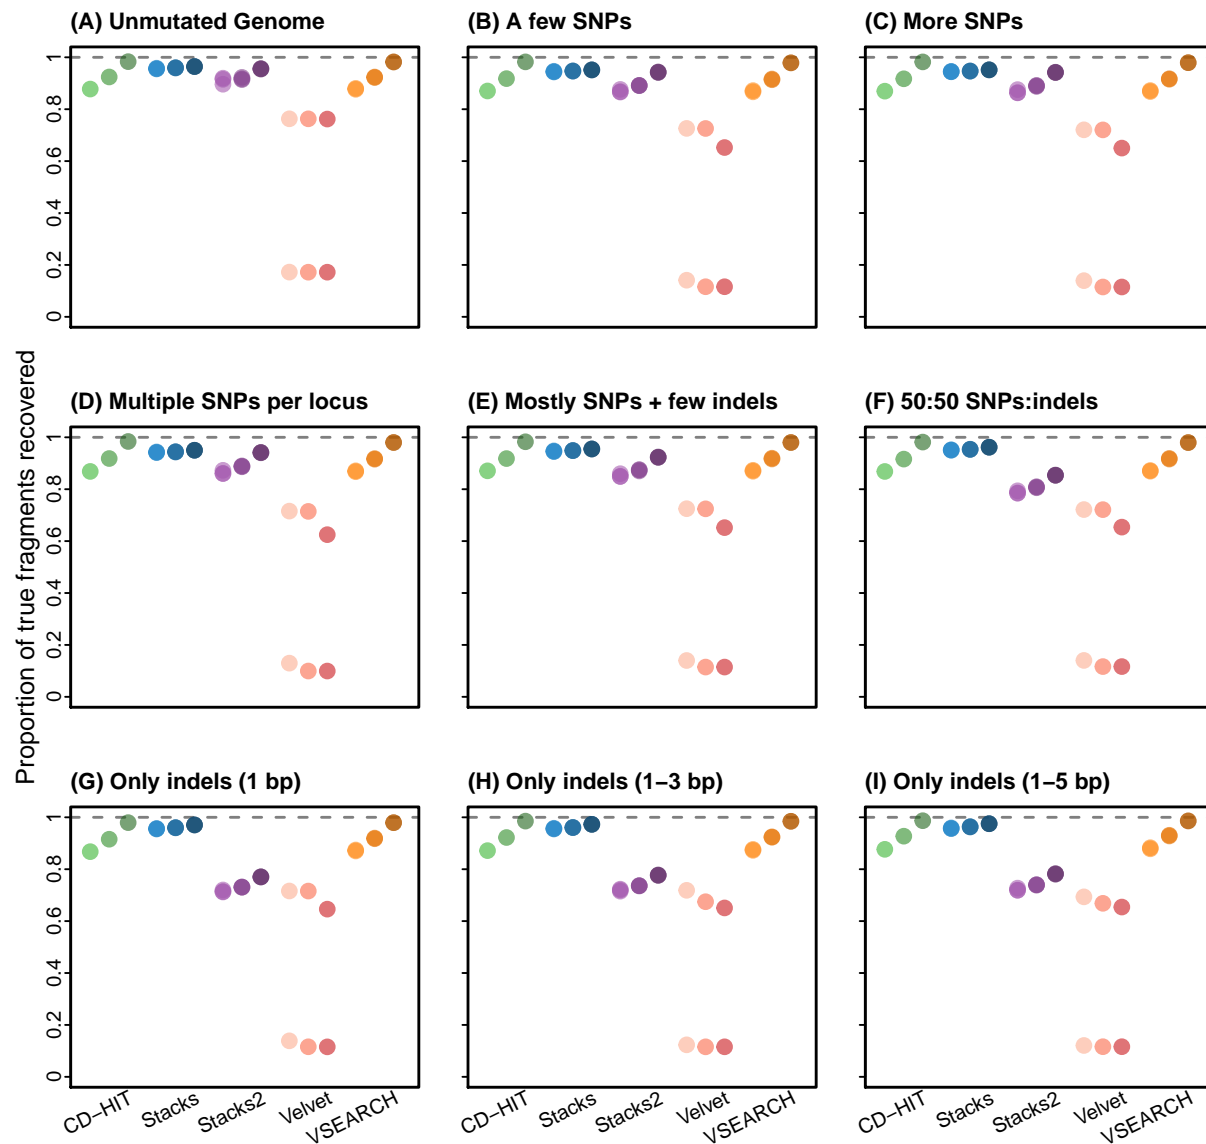

Figure S4: The completeness of assemblies in various simulations (A-I) derived from the *H. sapiens* genome. Completeness was calculated as the proportion of contigs that exactly matched original genome fragments. A value less than 1 indicates that some of the contigs produced were not found in the genome fragments. CD-HIT is green, Stacks is blue, Stacks2 is purple, Velvet is pink, and VSEARCH is orange. The impact of varying the percent match parameter setting is represented by the gradient in the hue of assembler-specific colors (light hue = 90%, medium hue=94% and dark hue=98% match). Assemblers have multiple dots in the same hue when k-mer length affected assembly outcome (see Table S3 for details).

Table S1: Articles included in our literature review, listed in reverse chronological order. We excluded papers from our literature review that did not present new data, such as review papers (no new GBS), papers that utilized a single restriction enzyme instead of two (one RE), and papers that performed reference-based assembly (reference genome). We sought papers that performed *de novo* assembly (*de novo* assembly), and for these papers we recorded the assembly software used (software), and whether they reported varying parameter settings (percent match, k-mer length, and other setting). For all columns, T = true and F = false. Of the 100 papers meeting our desired criteria, 39 used **Stacks** (the period we reviewed preceded the release of **Stacks2**) (Catchen *et al.*, 2011), 19 used **UNEAK** (Lu *et al.*, 2013), 11 used **VSEARCH** (Rognes *et al.*, 2016), and 14 used one of the following assemblers: **DNASTAR SeqMan** (DNASTAR, Inc.), **dDocent** (i.e., **CD-HIT**) (Puritz *et al.*, 2014), or **AftrRAD** (Sovic *et al.*, 2015). The remaining 17 papers each used a unique assembler.

| DOI                               | No new GBS | One RE | Reference genome | <i>de novo</i> assembly | Software         | Percent match | k-mer length | Other setting |
|-----------------------------------|------------|--------|------------------|-------------------------|------------------|---------------|--------------|---------------|
| 10.1016/j.ympv.2017.07.009        | F          | F      | T                | T                       | pyRAD            | F             | F            | T             |
| 10.1111/syen.12242                | T          | NA     | NA               | NA                      | NA               | NA            | NA           | NA            |
| 10.1111/nph.14722                 | NA         | T      | NA               | NA                      | NA               | NA            | NA           | NA            |
| 10.1016/j.aquaculture.2017.07.012 | F          | F      | T                | F                       | NA               | NA            | NA           | NA            |
| 10.3389/fpls.2017.01531           | T          | NA     | NA               | NA                      | NA               | NA            | NA           | NA            |
| 10.1093/molbev/msx164             | T          | NA     | NA               | NA                      | NA               | NA            | NA           | NA            |
| 10.1111/mec.14224                 | F          | F      | T                | NA                      | NA               | NA            | NA           | NA            |
| 10.1094/PHYTO-12-16-0421-R        | F          | T      | NA               | NA                      | NA               | NA            | NA           | NA            |
| 10.1007/s10142-017-0552-1         | F          | T      | NA               | NA                      | NA               | NA            | NA           | NA            |
| 10.1007/s00122-017-2924-2         | F          | T      | NA               | NA                      | NA               | NA            | NA           | NA            |
| 10.1007/s00122-017-2930-4         | T          | NA     | NA               | NA                      | NA               | NA            | NA           | NA            |
| 10.1038/hdy.2017.22               | F          | T      | NA               | NA                      | NA               | NA            | NA           | NA            |
| 10.1007/s11160-017-9473-2         | T          | NA     | NA               | NA                      | NA               | NA            | NA           | NA            |
| 10.3389/fpls.2017.01477           | F          | T      | NA               | NA                      | NA               | NA            | NA           | NA            |
| 10.1038/s41598-017-09906-7        | F          | T      | NA               | NA                      | NA               | NA            | NA           | NA            |
| 10.1038/s41598-017-09987-4        | F          | T      | NA               | NA                      | NA               | NA            | NA           | NA            |
| 10.3389/fpls.2017.01293           | F          | F      | T                | NA                      | NA               | NA            | NA           | NA            |
| 10.1186/s12864-017-3979-9         | F          | T      | NA               | NA                      | NA               | NA            | NA           | NA            |
| 10.1186/s41065-017-0043-3         | F          | T      | NA               | NA                      | NA               | NA            | NA           | NA            |
| 10.1371/journal.pone.0182918      | F          | NA     | T                | NA                      | NA               | NA            | NA           | NA            |
| 10.1186/s12864-017-3991-0         | F          | T      | NA               | NA                      | NA               | NA            | NA           | NA            |
| 10.1038/s41598-017-08362-7        | F          | T      | NA               | NA                      | NA               | NA            | NA           | NA            |
| 10.1186/s12864-017-3980-3         | NA         | NA     | T                | NA                      | NA               | NA            | NA           | NA            |
| 10.1016/j.molp.2017.06.008        | T          | NA     | NA               | NA                      | NA               | NA            | NA           | NA            |
| 10.1093/dnares/dsx012             | T          | NA     | NA               | NA                      | NA               | NA            | NA           | NA            |
| 10.1007/s11032-017-0705-x         | T          | NA     | NA               | NA                      | NA               | NA            | NA           | NA            |
| 10.1534/g3.117.043265             | F          | F      | F                | T                       | CLC Workbench    | F             | F            | F             |
| 10.1534/g3.117.043067             | F          | T      | NA               | NA                      | NA               | NA            | NA           | NA            |
| 10.1111/mec.14163                 | F          | T      | NA               | NA                      | NA               | NA            | NA           | NA            |
| 10.1111/2041-210X.12700           | T          | NA     | NA               | NA                      | NA               | NA            | NA           | NA            |
| 10.1111/mec.14169                 | F          | F      | F                | T                       | Stacks           | NA            | NA           | T             |
| 10.1111/mec.14178                 | F          | F      | F                | T                       | DNASTAR SeqMan   | F             | F            | F             |
| 10.1086/692138                    | F          | F      | F                | T                       | RADToolKit       | F             | F            | F             |
| 10.1111/age.12547                 | F          | F      | T                | NA                      | NA               | NA            | NA           | NA            |
| 10.1007/s00040-017-0553-3         | F          | F      | F                | T                       | Stacks           | F             | F            | F             |
| 10.1186/s12864-017-3960-7         | F          | F      | T                | F                       | NA               | NA            | NA           | NA            |
| 10.1038/s41598-017-06582-5        | F          | F      | F                | T                       | VSEARCH          | F             | F            | F             |
| 10.3389/fgene.2017.00098          | F          | F      | F                | F                       | NA               | NA            | NA           | NA            |
| 10.3389/fpls.2017.01275           | F          | F      | T                | F                       | NA               | NA            | NA           | NA            |
| 10.1038/s41598-017-05794-z        | F          | T      | NA               | NA                      | NA               | NA            | NA           | NA            |
| 10.1093/bioinformatics/btx177     | T          | NA     | NA               | NA                      | NA               | NA            | NA           | NA            |
| 10.1038/s41598-017-05756-5        | F          | T      | NA               | NA                      | NA               | NA            | NA           | NA            |
| 10.1371/journal.pone.0180774      | F          | F      | T                | NA                      | NA               | NA            | NA           | NA            |
| 10.1038/s41598-017-05087-5        | F          | F      | T                | NA                      | NA               | NA            | NA           | NA            |
| 10.1038/s41598-017-04903-2        | F          | F      | T                | NA                      | NA               | NA            | NA           | NA            |
| 10.1371/journal.pntd.0005710      | F          | T      | NA               | NA                      | NA               | NA            | NA           | NA            |
| 10.1111/jse.12268                 | F          | T      | NA               | NA                      | NA               | NA            | NA           | NA            |
| 10.1111/evo.13251                 | F          | T      | NA               | NA                      | NA               | NA            | NA           | NA            |
| 10.1534/genetics.117.200303       | F          | T      | NA               | NA                      | NA               | NA            | NA           | NA            |
| 10.1093/aob/mcx038                | F          | F      | F                | T                       | UNEAK            | F             | F            | F             |
| 10.1534/g3.117.042036             | F          | F      | T                | NA                      | NA               | NA            | NA           | NA            |
| 10.1534/g3.117.041780             | F          | T      | NA               | NA                      | NA               | NA            | NA           | NA            |
| 10.1534/g3.117.043141             | F          | T      | NA               | NA                      | NA               | NA            | NA           | NA            |
| 10.1111/mec.14125                 | F          | F      | F                | T                       | PyRAD            | F             | F            | F             |
| 10.1111/mec.14142                 | F          | F      | F                | T                       | Stacks           | F             | F            | F             |
| 10.1002/ece3.3065                 | F          | F      | F                | T                       | custom pipelines | F             | F            | F             |
| 10.1007/s00122-017-2897-1         | F          | T      | NA               | NA                      | NA               | NA            | NA           | NA            |
| 10.1007/s00122-017-2906-4         | F          | T      | NA               | NA                      | NA               | NA            | NA           | NA            |
| 10.1094/PHYTO-08-16-0295-R        | T          | NA     | NA               | NA                      | NA               | NA            | NA           | NA            |
| 10.1094/PHYTO-08-16-0319-R        | F          | T      | NA               | NA                      | NA               | NA            | NA           | NA            |
| 10.1111/1755-0998.12632           | T          | NA     | NA               | NA                      | NA               | NA            | NA           | NA            |
| 10.1111/1755-0998.12606           | T          | NA     | NA               | NA                      | NA               | NA            | NA           | NA            |

Continued on next page



Table S1 – continued from previous page

| DOI                               | No new GBS | One RE | Reference genome | de novo assembly | Software        | Percent match | k-mer length | Other setting |
|-----------------------------------|------------|--------|------------------|------------------|-----------------|---------------|--------------|---------------|
| 10.1111/1755-0998.12613           | T          | NA     | NA               | NA               | NA              | NA            | NA           | NA            |
| 10.1111/1755-0998.12624           | F          | F      | F                | T                | Stacks          | F             | F            | F             |
| 10.1016/j.ympcv.2017.04.016       | F          | T      | NA               | NA               | NA              | NA            | NA           | NA            |
| 10.1016/j.ympcv.2017.04.025       | F          | F      | T                | NA               | NA              | NA            | NA           | NA            |
| 10.1016/j.aquaculture.2017.04.001 | F          | T      | NA               | NA               | NA              | NA            | NA           | NA            |
| 10.3389/fpls.2017.01152           | F          | T      | NA               | NA               | NA              | NA            | NA           | NA            |
| 10.18632/oncotarget.18355         | F          | F      | T                | NA               | NA              | NA            | NA           | NA            |
| 10.1371/journal.pone.0179747      | T          | NA     | NA               | NA               | NA              | NA            | NA           | NA            |
| 10.1186/s12864-017-3854-8         | F          | F      | T                | NA               | NA              | NA            | NA           | NA            |
| 10.1371/journal.pone.0179073      | T          | NA     | NA               | NA               | NA              | NA            | NA           | NA            |
| 10.1038/s41598-017-03528-9        | T          | F      | T                | NA               | NA              | NA            | NA           | NA            |
| 10.1186/s12864-017-3830-3         | F          | F      | F                | T                | Stacks          | F             | F            | F             |
| 10.1186/s12862-017-0982-3         | T          | NA     | NA               | NA               | NA              | NA            | NA           | NA            |
| 10.1270/jsbbs.17013               | F          | F      | T                | NA               | NA              | NA            | NA           | NA            |
| 10.1270/jsbbs.16116               | F          | F      | F                | T                | RFAPtools       | F             | F            | F             |
| 10.1007/s13580-017-0268-0         | F          | F      | F                | T                | doesn't specify | F             | F            | F             |
| 10.1007/s11032-017-0677-x         | T          | NA     | NA               | NA               | NA              | NA            | NA           | NA            |
| 10.1093/aob/mcx022                | F          | T      | NA               | NA               | NA              | NA            | NA           | NA            |
| 10.1002/ece3.3023                 | F          | F      | F                | T                | Stacks          | F             | F            | F             |
| 10.1016/j.margen.2017.01.004      | F          | T      | NA               | NA               | NA              | NA            | NA           | NA            |
| 10.1111/wbm.12119                 | F          | T      | NA               | NA               | NA              | NA            | NA           | NA            |
| 10.1534/g3.117.042101             | F          | T      | NA               | NA               | NA              | NA            | NA           | NA            |
| 10.1534/genetics.116.198499       | F          | T      | NA               | NA               | NA              | NA            | NA           | NA            |
| 10.1007/s10126-017-9747-7         | F          | F      | T                | NA               | NA              | NA            | NA           | NA            |
| 10.1007/s00122-017-2874-8         | F          | F      | T                | NA               | NA              | NA            | NA           | NA            |
| 10.1111/mec.14002                 | F          | T      | NA               | NA               | NA              | NA            | NA           | NA            |
| 10.1016/j.ympcv.2017.03.023       | F          | F      | T                | NA               | NA              | NA            | NA           | NA            |
| 10.1016/j.ympcv.2017.04.001       | F          | F      | T                | NA               | NA              | NA            | NA           | NA            |
| 10.1111/gcb.13639                 | F          | F      | T                | NA               | NA              | NA            | NA           | NA            |
| 10.1186/s12870-017-1045-z         | F          | F      | T                | NA               | NA              | NA            | NA           | NA            |
| 10.1371/journal.pone.0177898      | F          | F      | T                | NA               | NA              | NA            | NA           | NA            |
| 10.3389/fpls.2017.00840           | F          | T      | NA               | NA               | NA              | NA            | NA           | NA            |
| 10.3389/fpls.2017.00828           | F          | T      | NA               | NA               | NA              | NA            | NA           | NA            |
| 10.3389/fpls.2017.00811           | F          | T      | NA               | NA               | NA              | NA            | NA           | NA            |
| 10.1038/s41598-017-01537-2        | F          | T      | NA               | NA               | NA              | NA            | NA           | NA            |
| 10.1038/s41598-017-01535-4        | F          | T      | NA               | NA               | NA              | NA            | NA           | NA            |
| 10.1371/journal.pone.0176113      | F          | T      | NA               | NA               | NA              | NA            | NA           | NA            |
| 10.3389/fpls.2017.00679           | F          | F      | F                | T                | stacks          | F             | F            | F             |
| 10.3389/fpls.2017.00765           | F          | F      | T                | NA               | NA              | NA            | NA           | NA            |
| 10.1038/s41598-017-01742-z        | F          | F      | F                | T                | Pear,USEARCH    | F             | F            | F             |
| 10.3389/fpls.2017.00706           | F          | F      | T                | NA               | NA              | NA            | NA           | NA            |
| 10.3732/ajb.1600232               | F          | T      | NA               | NA               | NA              | NA            | NA           | NA            |
| 10.3732/ajb.1700045               | F          | F      | F                | T                | stacks          | T             | F            | F             |
| 10.1111/mec.14110                 | T          | NA     | NA               | NA               | NA              | NA            | NA           | NA            |
| 10.1111/mec.14077                 | T          | NA     | NA               | NA               | NA              | NA            | NA           | NA            |
| 10.1111/1755-0998.12649           | T          | NA     | NA               | NA               | NA              | NA            | NA           | NA            |
| 10.1111/1755-0998.12677           | T          | NA     | NA               | NA               | NA              | NA            | NA           | NA            |
| 10.1111/1755-0998.12575           | T          | NA     | NA               | NA               | NA              | NA            | NA           | NA            |
| 10.1111/1755-0998.12583           | F          | T      | NA               | NA               | NA              | NA            | NA           | NA            |
| 10.1111/1755-0998.12564           | F          | F      | F                | T                | Newbler         | F             | F            | F             |
| 10.1534/g3.117.039966             | F          | F      | F                | T                | UNEAK           | F             | F            | F             |
| 10.1007/s10530-017-1385-5         | F          | T      | NA               | NA               | NA              | NA            | NA           | NA            |
| 10.1007/s10265-017-0917-5         | F          | F      | F                | T                | Stacks          | F             | F            | F             |
| 10.1093/sysbio/syw092             | T          | NA     | NA               | NA               | NA              | NA            | NA           | NA            |
| 10.1111/gcb.13528                 | F          | T      | NA               | NA               | NA              | NA            | NA           | NA            |
| 10.1038/hortres.2017.17           | F          | T      | NA               | NA               | NA              | NA            | NA           | NA            |
| 10.3389/fpls.2017.00615           | F          | F      | T                | NA               | NA              | NA            | NA           | NA            |
| 10.1038/srep46509                 | F          | T      | NA               | NA               | NA              | NA            | NA           | NA            |
| 10.3389/fpls.2017.00575           | F          | T      | NA               | NA               | NA              | NA            | NA           | NA            |
| 10.1038/srep46305                 | F          | T      | NA               | NA               | NA              | NA            | NA           | NA            |
| 10.1038/hortres.2017.15           | F          | T      | NA               | NA               | NA              | NA            | NA           | NA            |
| 10.3389/fpls.2017.00476           | F          | T      | NA               | NA               | NA              | NA            | NA           | NA            |
| 10.1371/journal.pone.0175361      | F          | F      | T                | NA               | NA              | NA            | NA           | NA            |
| 10.1038/srep46112                 | F          | T      | NA               | NA               | NA              | NA            | NA           | NA            |
| 10.1186/s12863-017-0501-y         | F          | F      | T                | NA               | NA              | NA            | NA           | NA            |
| 10.1002/ece3.2872                 | F          | T      | NA               | NA               | NA              | NA            | NA           | NA            |
| 10.1002/ece3.2902                 | F          | F      | F                | T                | Stacks          | F             | F            | F             |
| 10.1007/s11032-017-0651-7         | F          | F      | NA               | NA               | NA              | NA            | NA           | NA            |
| 10.1534/g3.116.037556             | F          | T      | NA               | NA               | NA              | NA            | NA           | NA            |
| 10.1139/cjfas-2015-0430           | F          | T      | NA               | NA               | NA              | NA            | NA           | NA            |
| 10.1007/s10681-017-1873-9         | F          | T      | NA               | NA               | NA              | NA            | NA           | NA            |
| 10.1007/s10681-017-1849-9         | F          | T      | NA               | NA               | NA              | NA            | NA           | NA            |
| 10.1007/s10681-017-1866-8         | T          | NA     | NA               | NA               | NA              | NA            | NA           | NA            |
| 10.1007/s10681-017-1867-7         | F          | T      | NA               | NA               | NA              | NA            | NA           | NA            |
| 10.2983/035.036.0128              | F          | T      | NA               | NA               | NA              | NA            | NA           | NA            |
| 10.1007/s00122-016-2843-7         | T          | NA     | NA               | NA               | NA              | NA            | NA           | NA            |
| 10.1080/00071668.2016.1268251     | T          | NA     | NA               | NA               | NA              | NA            | NA           | NA            |
| 10.1007/s10592-016-0907-5         | F          | T      | NA               | NA               | NA              | NA            | NA           | NA            |
| 10.1007/s10592-016-0919-1         | F          | F      | F                | T                | VSEARCH         | F             | F            | F             |
| 10.1111/evo.13173                 | F          | F      | T                | NA               | NA              | NA            | NA           | NA            |
| 10.1016/j.ympcv.2016.12.029       | F          | F      | F                | T                | Stacks          | F             | F            | F             |
| 10.1016/j.ympcv.2017.02.009       | F          | T      | NA               | NA               | NA              | NA            | NA           | NA            |
| 10.1094/PHYTO-06-16-0246-R        | NA         | NA     | NA               | NA               | NA              | NA            | NA           | NA            |
| 10.1111/syen.12211                | F          | F      | T                | NA               | NA              | NA            | NA           | NA            |
| 10.1111/syen.12216                | F          | F      | F                | T                | VSEARCH         | T             | F            | T             |
| 10.1007/s11105-016-1012-0         | F          | T      | NA               | NA               | NA              | NA            | NA           | NA            |
| 10.1642/AUK-16-31.1               | F          | T      | NA               | NA               | NA              | NA            | NA           | NA            |
| 10.1186/s12711-017-0311-8         | F          | F      | T                | NA               | NA              | NA            | NA           | NA            |

Continued on next page

Table S1 – continued from previous page

| DOI                             | No new GBS | One RE | Reference genome | de novo assembly | Software       | Percent match | k-mer length | Other setting |
|---------------------------------|------------|--------|------------------|------------------|----------------|---------------|--------------|---------------|
| 10.1186/s12864-017-3634-5       | F          | T      | NA               | NA               | NA             | NA            | NA           | NA            |
| 10.1371/journal.pone.0174299    | F          | T      | NA               | NA               | NA             | NA            | NA           | NA            |
| 10.1186/s12284-017-0147-4       | F          | T      | NA               | NA               | NA             | NA            | NA           | NA            |
| 10.1038/s41598-017-00246-0      | F          | F      | T                | NA               | NA             | NA            | NA           | NA            |
| 10.1038/srep44559               | F          | T      | NA               | NA               | NA             | NA            | NA           | NA            |
| 10.3389/fpls.2017.00321         | F          | T      | NA               | NA               | NA             | NA            | NA           | NA            |
| 10.1038/srep44207               | F          | F      | T                | NA               | NA             | NA            | NA           | NA            |
| 10.1038/srep43417               | F          | T      | NA               | NA               | NA             | NA            | NA           | NA            |
| 10.1371/journal.pone.0172949    | F          | T      | NA               | NA               | NA             | NA            | NA           | NA            |
| 10.1038/srep43241               | F          | F      | T                | NA               | NA             | NA            | NA           | NA            |
| 10.1016/j.hal.2017.01.003       | T          | NA     | NA               | NA               | NA             | NA            | NA           | NA            |
| 10.1007/s11032-017-0639-3       | F          | F      | T                | NA               | NA             | NA            | NA           | NA            |
| 10.1007/s11032-017-0646-4       | F          | T      | NA               | NA               | NA             | NA            | NA           | NA            |
| 10.1016/j.dsr.2.2016.03.011     | F          | T      | NA               | NA               | NA             | NA            | NA           | NA            |
| 10.3732/ajb.1600262             | F          | F      | F                | T                | dDocent        | F             | F            | F             |
| 10.1098/rsos.160880             | F          | T      | NA               | NA               | NA             | NA            | NA           | NA            |
| 10.1111/jeb.13033               | F          | F      | F                | T                | DNASTAR SeqMan | F             | F            | F             |
| 10.1007/s00122-016-2832-x       | F          | T      | NA               | NA               | NA             | NA            | NA           | NA            |
| 10.1007/s00122-016-2838-4       | T          | NA     | NA               | NA               | NA             | NA            | NA           | NA            |
| 10.1007/s12686-016-0614-z       | T          | NA     | NA               | NA               | NA             | NA            | NA           | NA            |
| 10.1007/s12686-016-0619-7       | T          | NA     | NA               | NA               | NA             | NA            | NA           | NA            |
| 10.2135/cropsci2016.04.0209     | F          | F      | T                | NA               | NA             | NA            | NA           | NA            |
| 10.2135/cropsci2016.08.0639     | F          | F      | T                | NA               | NA             | NA            | NA           | NA            |
| 10.1534/g3.116.036350           | F          | F      | F                | T                | dDocent        | F             | F            | F             |
| 10.1534/g3.116.038190           | F          | F      | T                | NA               | NA             | NA            | NA           | NA            |
| 10.1111/mec.14013               | F          | F      | F                | T                | PYRAD          | F             | F            | F             |
| 10.1111/mec.13973               | F          | F      | F                | T                | Stacks         | F             | F            | F             |
| 10.3835/plantgenome2016.08.0081 | F          | T      | NA               | NA               | NA             | NA            | NA           | NA            |
| 10.1007/s10681-017-1848-x       | F          | T      | NA               | NA               | NA             | NA            | NA           | NA            |
| 10.1007/s10681-017-1863-y       | F          | F      | T                | NA               | NA             | NA            | NA           | NA            |
| 10.1139/cjfas-2016-0012         | F          | T      | NA               | NA               | NA             | NA            | NA           | NA            |
| 10.1016/j.meegid.2016.12.006    | F          | F      | F                | T                | Stacks         | F             | F            | F             |
| 10.1111/1755-0998.12635         | T          | NA     | NA               | NA               | NA             | NA            | NA           | NA            |
| 10.1111/1755-0998.12610         | F          | T      | NA               | NA               | NA             | NA            | NA           | NA            |
| 10.1111/1755-0998.12550         | T          | NA     | NA               | NA               | NA             | NA            | NA           | NA            |
| 10.3389/fmicb.2017.00257        | T          | NA     | NA               | NA               | NA             | NA            | NA           | NA            |
| 10.1038/hdy.2016.96             | T          | NA     | NA               | NA               | NA             | NA            | NA           | NA            |
| 10.1007/s10722-016-0380-5       | F          | T      | NA               | NA               | NA             | NA            | NA           | NA            |
| 10.1371/journal.pone.0171710    | F          | T      | NA               | NA               | NA             | NA            | NA           | NA            |
| 10.1186/s12864-016-3393-8       | F          | F      | T                | NA               | NA             | NA            | NA           | NA            |
| 10.3389/fpls.2017.00138         | F          | F      | T                | NA               | NA             | NA            | NA           | NA            |
| 10.1186/s12870-016-0956-4       | F          | T      | NA               | NA               | NA             | NA            | NA           | NA            |
| 10.3389/fpls.2017.00143         | F          | F      | T                | NA               | NA             | NA            | NA           | NA            |
| 10.3389/fpls.2017.00089         | F          | T      | NA               | NA               | NA             | NA            | NA           | NA            |
| 10.3389/fpls.2017.00125         | F          | T      | NA               | NA               | NA             | NA            | NA           | NA            |
| 10.1371/journal.pone.0171254    | F          | F      | T                | NA               | NA             | NA            | NA           | NA            |
| 10.1139/cjps-2016-0048          | F          | T      | NA               | NA               | NA             | NA            | NA           | NA            |
| 10.1111/mec.13972               | F          | F      | T                | NA               | NA             | NA            | NA           | NA            |
| 10.1111/mec.13998               | F          | F      | F                | T                | Stacks         | F             | F            | F             |
| 10.1111/pbr.12433               | F          | F      | T                | NA               | NA             | NA            | NA           | NA            |
| 10.1017/S1479262115000349       | F          | F      | T                | NA               | NA             | NA            | NA           | NA            |
| 10.1007/s11295-017-1101-8       | T          | NA     | NA               | NA               | NA             | NA            | NA           | NA            |
| 10.1007/s11295-016-1084-x       | T          | NA     | NA               | NA               | NA             | NA            | NA           | NA            |
| 10.1111/mec.13946               | F          | T      | NA               | NA               | NA             | NA            | NA           | NA            |
| 10.1111/mec.13974               | F          | F      | F                | T                | Stacks         | T             | F            | F             |
| 10.1111/nph.14221               | F          | F      | F                | T                | Stacks         | F             | F            | F             |
| 10.1111/pbi.12645               | T          | NA     | NA               | NA               | NA             | NA            | NA           | NA            |
| 10.1007/s11105-016-1010-2       | F          | F      | T                | NA               | NA             | NA            | NA           | NA            |
| 10.1007/s10681-016-1830-z       | F          | T      | NA               | NA               | NA             | NA            | NA           | NA            |
| 10.1007/s00122-016-2782-3       | F          | T      | NA               | NA               | NA             | NA            | NA           | NA            |
| 10.1007/s00122-016-2813-0       | F          | T      | NA               | NA               | NA             | NA            | NA           | NA            |
| 10.1111/mpp.12389               | F          | T      | NA               | NA               | NA             | NA            | NA           | NA            |
| 10.1038/srep41578               | T          | NA     | NA               | NA               | NA             | NA            | NA           | NA            |
| 10.1111/age.12478               | F          | F      | F                | T                | Stacks         | F             | F            | F             |
| 10.1111/een.12346               | F          | T      | NA               | NA               | NA             | NA            | NA           | NA            |
| 10.1371/journal.pone.0171053    | F          | T      | NA               | NA               | NA             | NA            | NA           | NA            |
| 10.1186/s41065-016-0024-y       | T          | NA     | NA               | NA               | NA             | NA            | NA           | NA            |
| 10.1371/journal.pone.0170655    | F          | T      | NA               | NA               | NA             | NA            | NA           | NA            |
| 10.1371/journal.pone.0170580    | F          | F      | F                | T                | GBS-SNP-CROP   | F             | F            | F             |
| 10.1186/s12864-016-3475-7       | F          | T      | NA               | NA               | NA             | NA            | NA           | NA            |
| 10.1038/srep41124               | F          | F      | T                | NA               | NA             | NA            | NA           | NA            |
| 10.1186/s12870-017-0970-1       | F          | T      | NA               | NA               | NA             | NA            | NA           | NA            |
| 10.3389/fpls.2016.02062         | T          | NA     | NA               | NA               | NA             | NA            | NA           | NA            |
| 10.1186/s12864-016-3439-y       | F          | T      | NA               | NA               | NA             | NA            | NA           | NA            |
| 10.3389/fpls.2017.00012         | T          | NA     | NA               | NA               | NA             | NA            | NA           | NA            |
| 10.1186/s12864-016-3383-x       | F          | T      | NA               | NA               | NA             | NA            | NA           | NA            |
| 10.1186/s12864-016-3462-z       | F          | F      | F                | T                | Stacks         | F             | F            | F             |
| 10.1186/s12864-016-3429-0       | F          | T      | NA               | NA               | NA             | NA            | NA           | NA            |
| 10.1371/journal.pone.0169234    | F          | T      | NA               | NA               | NA             | NA            | NA           | NA            |
| 10.1016/j.scienta.2016.11.011   | T          | NA     | NA               | NA               | NA             | NA            | NA           | NA            |
| 10.1186/s12859-016-1431-9       | T          | NA     | NA               | NA               | NA             | NA            | NA           | NA            |
| 10.1186/s12864-016-3406-7       | F          | T      | NA               | NA               | NA             | NA            | NA           | NA            |
| 10.3389/fpls.2016.01918         | T          | NA     | NA               | NA               | NA             | NA            | NA           | NA            |
| 10.1007/978-1-4939-6442-0.16    | T          | NA     | NA               | NA               | NA             | NA            | NA           | NA            |
| 10.1104/pp.16.01178             | F          | T      | NA               | NA               | NA             | NA            | NA           | NA            |
| 10.1002/ecs2.1649               | F          | F      | F                | T                | dDocent        | F             | F            | F             |
| 10.3934/agrfood.2017.1.16       | T          | NA     | NA               | NA               | NA             | NA            | NA           | NA            |
| 10.1371/journal.pntd.0005292    | F          | F      | T                | NA               | NA             | NA            | NA           | NA            |

Continued on next page

Table S1 – continued from previous page

| DOI                             | No new GBS | One RE | Reference genome | de novo assembly | Software       | Percent match | k-mer length | Other setting |
|---------------------------------|------------|--------|------------------|------------------|----------------|---------------|--------------|---------------|
| 10.1111/nph.14155               | F          | F      | T                | NA               | NA             | NA            | NA           | NA            |
| 10.1111/mec.13933               | F          | T      | NA               | NA               | NA             | NA            | NA           | NA            |
| 10.1111/mec.13937               | F          | F      | F                | T                | Stacks         | T             | F            | F             |
| 10.1002/ece3.2623               | F          | F      | F                | T                | Stacks         | T             | F            | F             |
| 10.1111/eva.12432               | F          | T      | NA               | NA               | NA             | NA            | NA           | NA            |
| 10.1534/g3.116.033241           | F          | T      | NA               | NA               | NA             | NA            | NA           | NA            |
| 10.1534/g3.116.035741           | F          | T      | NA               | NA               | NA             | NA            | NA           | NA            |
| 10.1007/s00122-016-2785-0       | F          | F      | T                | NA               | NA             | NA            | NA           | NA            |
| 10.1007/s00122-016-2799-7       | F          | T      | NA               | NA               | NA             | NA            | NA           | NA            |
| 10.7717/peerj.2664              | F          | F      | T                | NA               | NA             | NA            | NA           | NA            |
| 10.1371/journal.pone.0167865    | F          | T      | NA               | NA               | NA             | NA            | NA           | NA            |
| 10.1371/journal.pone.0167723    | F          | T      | NA               | NA               | NA             | NA            | NA           | NA            |
| 10.1371/journal.pone.0167715    | F          | T      | NA               | NA               | NA             | NA            | NA           | NA            |
| 10.1038/sdata.2016.105          | T          | NA     | NA               | NA               | NA             | NA            | NA           | NA            |
| 10.1270/jsbbs.16059             | F          | F      | T                | NA               | NA             | NA            | NA           | NA            |
| 10.1016/j.atg.2016.10.004       | T          | NA     | NA               | NA               | NA             | NA            | NA           | NA            |
| 10.1007/s13580-016-0128-3       | F          | T      | NA               | NA               | NA             | NA            | NA           | NA            |
| 10.3732/ajb.1600295             | F          | T      | NA               | NA               | NA             | NA            | NA           | NA            |
| 10.1098/rsos.160651             | T          | NA     | NA               | NA               | NA             | NA            | NA           | NA            |
| 10.1007/s11032-016-0604-6       | F          | T      | NA               | NA               | NA             | NA            | NA           | NA            |
| 10.1111/jav.00946               | F          | T      | NA               | NA               | NA             | NA            | NA           | NA            |
| 10.1111/jfb.13149               | T          | NA     | NA               | NA               | NA             | NA            | NA           | NA            |
| 10.1111/jfb.13131               | F          | F      | T                | NA               | NA             | NA            | NA           | NA            |
| 10.1007/s00122-016-2816-x       | T          | NA     | NA               | NA               | NA             | NA            | NA           | NA            |
| 10.1007/s00122-016-2776-1       | F          | F      | T                | NA               | NA             | NA            | NA           | NA            |
| 10.1111/eva.12412               | F          | T      | NA               | NA               | NA             | NA            | NA           | NA            |
| 10.1007/s10709-016-9932-z       | F          | T      | NA               | NA               | NA             | NA            | NA           | NA            |
| 10.1007/s10528-016-9762-9       | F          | T      | NA               | NA               | NA             | NA            | NA           | NA            |
| 10.1007/s12686-016-0571-6       | F          | T      | F                | T                | Stacks         | F             | F            | F             |
| 10.1007/s12686-016-0584-1       | F          | F      | F                | T                | Stacks         | F             | F            | F             |
| 10.1007/s12686-016-0598-8       | F          | T      | NA               | NA               | NA             | NA            | NA           | NA            |
| 10.1038/srep38081               | F          | T      | NA               | NA               | NA             | NA            | NA           | NA            |
| 10.3389/fpls.2016.01724         | T          | NA     | NA               | NA               | NA             | NA            | NA           | NA            |
| 10.1186/s12864-016-3297-7       | F          | T      | NA               | NA               | NA             | NA            | NA           | NA            |
| 10.1186/s12863-016-0455-5       | F          | T      | NA               | NA               | NA             | NA            | NA           | NA            |
| 10.1038/srep36223               | F          | T      | NA               | NA               | NA             | NA            | NA           | NA            |
| 10.1186/s12864-016-3269-y       | F          | T      | NA               | NA               | NA             | NA            | NA           | NA            |
| 10.1186/s12864-016-3249-2       | F          | T      | NA               | NA               | NA             | NA            | NA           | NA            |
| 10.1186/s12864-016-3170-8       | F          | T      | NA               | NA               | NA             | NA            | NA           | NA            |
| 10.3389/fpls.2016.01646         | F          | T      | NA               | NA               | NA             | NA            | NA           | NA            |
| 10.1371/journal.pone.0165690    | F          | T      | NA               | NA               | NA             | NA            | NA           | NA            |
| 10.3835/plantgenome2015.11.0110 | F          | T      | NA               | NA               | NA             | NA            | NA           | NA            |
| 10.3835/plantgenome2016.06.0052 | F          | F      | T                | NA               | NA             | NA            | NA           | NA            |
| 10.3835/plantgenome2016.03.0035 | F          | T      | NA               | NA               | NA             | NA            | NA           | NA            |
| 10.1371/journal.pntd.0005096    | F          | F      | T                | NA               | NA             | NA            | NA           | NA            |
| 10.21273/JASHS03890-16          | F          | T      | NA               | NA               | NA             | NA            | NA           | NA            |
| 10.1534/g3.116.031286           | F          | T      | NA               | NA               | NA             | NA            | NA           | NA            |
| 10.1534/g3.116.035220           | F          | T      | NA               | NA               | NA             | NA            | NA           | NA            |
| 10.3732/apps.1600076            | F          | F?     | F                | T                | VelvetOpt      | F             | F            | F             |
| 10.1016/j.biocon.2016.10.003    | F          | F      | T                | NA               | NA             | NA            | NA           | NA            |
| 10.1007/s11032-016-0576-6       | F          | T      | NA               | NA               | NA             | NA            | NA           | NA            |
| 10.1007/s11032-016-0572-x       | F          | F      | T                | NA               | NA             | NA            | NA           | NA            |
| 10.1111/mec.13825               | F          | F      | F                | T                | DNASTAR SeqMan | T             | F            | F             |
| 10.1111/mec.13876               | F          | F      | F                | T                | PyRAD          | T             | F            | F             |
| 10.1002/ece3.2493               | F          | T      | NA               | NA               | NA             | NA            | NA           | NA            |
| 10.1007/s10681-016-1740-0       | F          | T      | NA               | NA               | NA             | NA            | NA           | NA            |
| 10.1007/s10681-016-1772-5       | F          | T      | NA               | NA               | NA             | NA            | NA           | NA            |
| 10.1007/s10228-016-0518-7       | F          | T      | NA               | NA               | NA             | NA            | NA           | NA            |
| 10.1007/s10228-016-0542-7       | T          | NA     | NA               | NA               | NA             | NA            | NA           | NA            |
| 10.1007/s00227-016-3000-1       | F          | F      | F                | T                | VSEARCH        | F             | F            | F             |
| 10.1111/mec.13743               | F          | F      | T                | NA               | NA             | NA            | NA           | NA            |
| 10.1111/mec.13841               | F          | T      | NA               | NA               | NA             | NA            | NA           | NA            |
| 10.1111/mec.13850               | F          | F      | F                | T                | Stacks         | F             | F            | F             |
| 10.1111/mec.13858               | F          | T      | NA               | NA               | NA             | NA            | NA           | NA            |
| 10.1111/pbi.12573               | F          | T      | NA               | NA               | NA             | NA            | NA           | NA            |
| 10.1007/s00122-016-2762-7       | F          | F      | F                | T                | Haplotag       | F             | F            | F             |
| 10.1111/1755-0998.12527         | T          | NA     | NA               | NA               | NA             | NA            | NA           | NA            |
| 10.1016/j.plantsci.2016.07.018  | T          | NA     | NA               | NA               | NA             | NA            | NA           | NA            |
| 10.1038/hdy.2016.56             | F          | F      | F                | T                | AfrRAD         | F             | F            | F             |
| 10.1007/s13353-016-0347-4       | T          | NA     | NA               | NA               | NA             | NA            | NA           | NA            |
| 10.1093/jhered/esw044           | T          | NA     | NA               | NA               | NA             | NA            | NA           | NA            |
| 10.1093/jhered/esw043           | F          | T      | NA               | NA               | NA             | NA            | NA           | NA            |
| 10.1371/journal.pone.0165279    | F          | T      | NA               | NA               | NA             | NA            | NA           | NA            |
| 10.1186/s12862-016-0806-x       | F          | T      | NA               | NA               | NA             | NA            | NA           | NA            |
| 10.1371/journal.pone.0162792    | F          | F      | F                | T                | Stacks         | T             | F            | T             |
| 10.1186/s12864-016-3177-1       | F          | F      | T                | NA               | NA             | NA            | NA           | NA            |
| 10.1038/srep36095               | F          | F      | F                | T                | dDocent        | F             | F            | F             |
| 10.1186/s40064-016-3459-8       | F          | T      | NA               | NA               | NA             | NA            | NA           | NA            |
| 10.1186/s12862-016-0784-z       | F          | T      | NA               | NA               | NA             | NA            | NA           | NA            |
| 10.1186/s12863-016-0445-7       | F          | T      | NA               | NA               | NA             | NA            | NA           | NA            |
| 10.1186/s12284-016-0119-0       | F          | T      | NA               | NA               | NA             | NA            | NA           | NA            |
| 10.1186/s12864-016-3120-5       | F          | F      | T                | NA               | NA             | NA            | NA           | NA            |
| 10.1186/s12284-016-0125-2       | F          | T      | NA               | NA               | NA             | NA            | NA           | NA            |
| 10.1007/s10126-016-9718-4       | F          | F      | T                | NA               | NA             | NA            | NA           | NA            |
| 10.1111/jeb.12931               | F          | F      | T                | NA               | NA             | NA            | NA           | NA            |
| 10.1038/NPLANTS.2016.150        | T          | NA     | NA               | NA               | NA             | NA            | NA           | NA            |
| 10.3732/ajb.1600069             | F          | T      | NA               | NA               | NA             | NA            | NA           | NA            |
| 10.1093/aob/mcw137              | F          | F      | F                | T                | UNEAK          | F             | F            | F             |

Continued on next page

Table S1 – continued from previous page

| DOI                               | No new GBS | One RE | Reference genome | de novo assembly | Software       | Percent match | k-mer length | Other setting |
|-----------------------------------|------------|--------|------------------|------------------|----------------|---------------|--------------|---------------|
| 10.1002/ece3.2466                 | F          | F      | F                | T                | Stacks         | T             | F            | T             |
| 10.1038/ismej.2016.29             | F          | F      | T                | NA               | NA             | NA            | NA           | NA            |
| 10.1642/AUK-16-61.1               | F          | T      | NA               | NA               | NA             | NA            | NA           | NA            |
| 10.1111/mec.13794                 | F          | F      | T                | NA               | NA             | NA            | NA           | NA            |
| 10.1007/s10709-016-9921-2         | F          | T      | NA               | NA               | NA             | NA            | NA           | NA            |
| 10.1111/mec.13795                 | F          | F      | F                | T                | Stacks         | F             | F            | T             |
| 10.1111/mec.13799                 | F          | F      | T                | NA               | NA             | NA            | NA           | NA            |
| 10.1093/icb/icw017                | F          | F      | F                | T                | PyRAD          | F             | F            | F             |
| 10.1094/PHYTO-02-16-0087-FI       | F          | F      | F                | T                | RedRep         | F             | F            | F             |
| 10.1094/PHYTO-02-16-0080-FI       | F          | T      | NA               | NA               | NA             | NA            | NA           | NA            |
| 10.1094/PHYTO-02-16-0055-FI       | F          | F      | F                | T                | Custom scripts | F             | F            | F             |
| 10.1111/nph.14038                 | F          | F      | F                | T                | DNASTar SeqMan | T             | F            | F             |
| 10.1186/s12864-016-3124-1         | F          | T      | NA               | NA               | NA             | NA            | NA           | NA            |
| 10.1371/journal.pone.0163292      | F          | F      | F                | T                | UNEAK          | F             | F            | F             |
| 10.1186/s12284-016-0121-6         | F          | F      | T                | NA               | NA             | NA            | NA           | NA            |
| 10.3389/fpls.2016.01437           | F          | T      | NA               | NA               | NA             | NA            | NA           | NA            |
| 10.7717/peerj.2465                | F          | T      | NA               | NA               | NA             | NA            | NA           | NA            |
| 10.1016/j.scienta.2016.06.005     | F          | T      | NA               | NA               | NA             | NA            | NA           | NA            |
| 10.1038/hortres.2016.43           | F          | T      | NA               | NA               | NA             | NA            | NA           | NA            |
| 10.1186/s12864-016-3081-8         | T          | NA     | NA               | NA               | NA             | NA            | NA           | NA            |
| 10.1371/journal.pone.0162573      | F          | T      | NA               | NA               | NA             | NA            | NA           | NA            |
| 10.1186/s12863-016-0435-9         | F          | T      | NA               | NA               | NA             | NA            | NA           | NA            |
| 10.2134/jas2016.94supplement47b   | T          | NA     | NA               | NA               | NA             | NA            | NA           | NA            |
| 10.2134/jas2016.94supplement408x  | T          | NA     | NA               | NA               | NA             | NA            | NA           | NA            |
| 10.2134/jas2016.94supplement416a  | T          | NA     | NA               | NA               | NA             | NA            | NA           | NA            |
| 10.2134/jas2016.94supplement420x  | T          | NA     | NA               | NA               | NA             | NA            | NA           | NA            |
| 10.2134/jas2016.94supplement4170a | T          | NA     | NA               | NA               | NA             | NA            | NA           | NA            |
| 10.1007/s00122-016-2732-0         | T          | NA     | NA               | NA               | NA             | NA            | NA           | NA            |
| 10.1007/s00122-016-2739-6         | F          | T      | NA               | NA               | NA             | NA            | NA           | NA            |
| 10.2135/cropsci2015.04.0207       | F          | T      | NA               | NA               | NA             | NA            | NA           | NA            |
| 10.2135/cropsci2015.10.0632       | F          | T      | NA               | NA               | NA             | NA            | NA           | NA            |
| 10.1534/genetics.116.191726       | F          | NA     | NA               | NA               | NA             | NA            | NA           | NA            |
| 10.1007/s11032-016-0558-8         | F          | NA     | NA               | NA               | NA             | NA            | NA           | NA            |
| 10.1007/s11032-016-0541-4         | T          | NA     | NA               | NA               | NA             | NA            | NA           | NA            |
| 10.1111/mec.13764                 | F          | T      | NA               | NA               | NA             | NA            | NA           | NA            |
| 10.1111/mec.13789                 | F          | F      | F                | T                | PyRAD          | T             | F            | T             |
| 10.1007/s12686-016-0558-3         | F          | T      | NA               | NA               | NA             | NA            | NA           | NA            |
| 10.1111/1755-0998.12566           | T          | NA     | NA               | NA               | NA             | NA            | NA           | NA            |
| 10.1094/PHYTO-11-15-0300-R        | F          | T      | NA               | NA               | NA             | NA            | NA           | NA            |
| 10.1093/sysbio/syw036             | T          | NA     | NA               | NA               | NA             | NA            | NA           | NA            |
| 10.1016/j.ympcv.2016.06.002       | F          | T      | NA               | NA               | NA             | NA            | NA           | NA            |
| 10.1016/j.ympcv.2016.05.032       | F          | T      | NA               | NA               | NA             | NA            | NA           | NA            |
| 10.1093/jhered/esw029             | F          | F      | F                | T                | Stacks         | F             | F            | F             |
| 10.1186/s12864-016-2966-x         | F          | T      | NA               | NA               | NA             | NA            | NA           | NA            |
| 10.3389/fpls.2016.01248           | F          | T      | NA               | NA               | NA             | NA            | NA           | NA            |
| 10.1186/s12864-016-3011-9         | F          | T      | NA               | NA               | NA             | NA            | NA           | NA            |
| 10.1371/journal.pone.0161333      | T          | NA     | NA               | NA               | NA             | NA            | NA           | NA            |
| 10.1186/s12864-016-3003-9         | F          | T      | NA               | NA               | NA             | NA            | NA           | NA            |
| 10.1371/journal.pone.0160733      | T          | NA     | NA               | NA               | NA             | NA            | NA           | NA            |
| 10.1038/srep31741                 | T          | NA     | NA               | NA               | NA             | NA            | NA           | NA            |
| 10.1371/journal.pone.0160941      | F          | T      | NA               | NA               | NA             | NA            | NA           | NA            |
| 10.1038/srep31109                 | F          | T      | NA               | NA               | NA             | NA            | NA           | NA            |
| 10.1186/s12864-016-2969-7         | F          | F      | F                | T                | Stacks         | F             | F            | T             |
| 10.1186/s13007-016-0139-1         | F          | F      | T                | NA               | NA             | NA            | NA           | NA            |
| 10.1007/s11032-016-0538-z         | F          | T      | NA               | NA               | NA             | NA            | NA           | NA            |
| 10.1111/mec.13708                 | F          | T      | NA               | NA               | NA             | NA            | NA           | NA            |
| 10.1139/gen-2016-0075             | F          | T      | NA               | NA               | NA             | NA            | NA           | NA            |
| 10.1111/mec.13722                 | F          | T      | NA               | NA               | NA             | NA            | NA           | NA            |
| 10.1111/mec.13728                 | F          | F      | F                | T                | AftrRAD        | F             | F            | F             |
| 10.1016/j.margen.2016.07.003      | F          | T      | NA               | NA               | NA             | NA            | NA           | NA            |
| 10.1111/mec.13703                 | F          | F      | F                | T                | Stacks         | F             | F            | F             |
| 10.1038/ng.3609                   | F          | T      | NA               | NA               | NA             | NA            | NA           | NA            |
| 10.1007/s11295-016-1032-9         | F          | F      | T                | NA               | NA             | NA            | NA           | NA            |
| 10.1007/s00122-016-2724-0         | F          | T      | NA               | NA               | NA             | NA            | NA           | NA            |
| 10.1111/imb.12234                 | F          | F      | F                | T                | Stacks         | F             | F            | F             |
| 10.1007/s12355-015-0390-1         | T          | NA     | NA               | NA               | NA             | NA            | NA           | NA            |
| 10.1016/j.ympcv.2016.05.002       | F          | T      | NA               | NA               | NA             | NA            | NA           | NA            |
| 10.1186/s12870-016-0847-8         | F          | T      | NA               | NA               | NA             | NA            | NA           | NA            |
| 10.1186/s13029-016-0057-7         | T          | NA     | NA               | NA               | NA             | NA            | NA           | NA            |
| 10.3835/plantgenome2015.07.0058   | F          | T      | NA               | NA               | NA             | NA            | NA           | NA            |
| 10.2135/cropsci2015.02.0097       | T          | NA     | NA               | NA               | NA             | NA            | NA           | NA            |
| 10.1111/1755-0998.12519           | T          | NA     | NA               | NA               | NA             | NA            | NA           | NA            |
| 10.1111/1755-0998.12510           | T          | NA     | NA               | NA               | NA             | NA            | NA           | NA            |
| 10.1111/1755-0998.12518           | F          | T      | NA               | NA               | NA             | NA            | NA           | NA            |
| 10.1093/sysbio/syw005             | F          | T      | NA               | NA               | NA             | NA            | NA           | NA            |
| 10.1093/aob/mcw081                | F          | T      | NA               | NA               | NA             | NA            | NA           | NA            |
| 10.3732/ajb.1600146               | F          | T      | NA               | NA               | NA             | NA            | NA           | NA            |
| 10.1007/s11032-016-0512-9         | F          | T      | NA               | NA               | NA             | NA            | NA           | NA            |
| 10.1007/s11032-016-0508-5         | F          | F      | T                | NA               | NA             | NA            | NA           | NA            |
| 10.1007/s11032-016-0513-8         | F          | T      | NA               | NA               | NA             | NA            | NA           | NA            |
| 10.1111/boj.12372                 | F          | T      | NA               | NA               | NA             | NA            | NA           | NA            |
| 10.1002/ece3.2221                 | T          | NA     | NA               | NA               | NA             | NA            | NA           | NA            |
| 10.1534/g3.116.030510             | F          | T      | NA               | NA               | NA             | NA            | NA           | NA            |
| 10.1534/genetics.116.190314       | F          | T      | NA               | NA               | NA             | NA            | NA           | NA            |
| 10.1111/mec.13682                 | F          | T      | NA               | NA               | NA             | NA            | NA           | NA            |
| 10.3835/plantgenome2015.10.0105   | F          | T      | NA               | NA               | NA             | NA            | NA           | NA            |
| 10.3835/plantgenome2015.10.0102   | T          | NA     | NA               | NA               | NA             | NA            | NA           | NA            |
| 10.3835/plantgenome2015.08.0071   | F          | F      | F                | T                | UNEAK          | F             | F            | F             |

Continued on next page

Table S1 – continued from previous page

| DOI                             | No new GBS | One RE | Reference genome | de novo assembly | Software       | Percent match | k-mer length | Other setting |
|---------------------------------|------------|--------|------------------|------------------|----------------|---------------|--------------|---------------|
| 10.3835/plantgenome2015.10.0106 | F          | T      | NA               | NA               | NA             | NA            | NA           | NA            |
| 10.3835/plantgenome2015.08.0074 | F          | T      | NA               | NA               | NA             | NA            | NA           | NA            |
| 10.3835/plantgenome2015.09.0090 | F          | T      | NA               | NA               | NA             | NA            | NA           | NA            |
| 10.1111/mec.13613               | F          | T      | NA               | NA               | NA             | NA            | NA           | NA            |
| 10.1007/s00122-016-2711-5       | F          | F      | F                | T                | UNEAK          | F             | F            | T             |
| 10.1007/s00122-016-2712-4       | F          | T      | NA               | NA               | NA             | NA            | NA           | NA            |
| 10.1016/j.fcr.2016.03.008       | F          | T      | NA               | NA               | NA             | NA            | NA           | NA            |
| 10.1016/j.ympcv.2016.03.010     | F          | T      | NA               | NA               | NA             | NA            | NA           | NA            |
| 10.1016/j.ympcv.2016.04.012     | F          | T      | NA               | NA               | NA             | NA            | NA           | NA            |
| 10.1186/s12864-016-2834-8       | F          | F      | T                | NA               | NA             | NA            | NA           | NA            |
| 10.3389/fpls.2016.00956         | F          | T      | NA               | NA               | NA             | NA            | NA           | NA            |
| 10.1038/srep28569               | F          | T      | NA               | NA               | NA             | NA            | NA           | NA            |
| 10.1371/journal.pone.0157809    | F          | T      | NA               | NA               | NA             | NA            | NA           | NA            |
| 10.1038/srep27968               | F          | T      | NA               | NA               | NA             | NA            | NA           | NA            |
| 10.1186/s12864-016-2781-4       | F          | F      | T                | NA               | NA             | NA            | NA           | NA            |
| 10.3389/fpls.2016.00777         | F          | T      | NA               | NA               | NA             | NA            | NA           | NA            |
| 10.1186/s12864-016-2756-5       | F          | F      | T                | NA               | NA             | NA            | NA           | NA            |
| 10.1186/s12862-016-0702-4       | F          | F      | F                | T                | DNASTAR SeqMan | F             | F            | F             |
| 10.1186/s12864-016-2802-3       | F          | NA     | NA               | NA               | NA             | NA            | NA           | NA            |
| 10.1186/s12864-016-2773-4       | F          | F      | F                | T                | Stacks         | F             | F            | T             |
| 10.1111/mec.13644               | F          | T      | NA               | NA               | NA             | NA            | NA           | NA            |
| 10.1111/mec.13587               | F          | T      | NA               | NA               | NA             | NA            | NA           | NA            |
| 10.1111/mec.13569               | F          | T      | NA               | NA               | NA             | NA            | NA           | NA            |
| 10.3732/apps.1600025            | T          | NA     | NA               | NA               | NA             | NA            | NA           | NA            |
| 10.1007/s11032-016-0491-x       | F          | T      | NA               | NA               | NA             | NA            | NA           | NA            |
| 10.1007/s11032-016-0490-y       | F          | T      | NA               | NA               | NA             | NA            | NA           | NA            |
| 10.1093/jee/tow047              | T          | NA     | NA               | NA               | NA             | NA            | NA           | NA            |
| 10.1007/s11295-016-1012-0       | F          | F      | T                | NA               | NA             | NA            | NA           | NA            |
| 10.1007/s10528-016-9721-5       | F          | T      | NA               | NA               | NA             | NA            | NA           | NA            |
| 10.1002/ece3.2110               | F          | T      | NA               | NA               | NA             | NA            | NA           | NA            |
| 10.1002/ece3.2143               | F          | T      | NA               | NA               | NA             | NA            | NA           | NA            |
| 10.1111/pbr.12369               | F          | T      | NA               | NA               | NA             | NA            | NA           | NA            |
| 10.1111/fw.12758                | F          | F      | F                | T                | DNASTAR SeqMan | F             | F            | F             |
| 10.1007/s00438-016-1182-3       | F          | T      | NA               | NA               | NA             | NA            | NA           | NA            |
| 10.1007/s00122-016-2685-3       | T          | NA     | NA               | NA               | NA             | NA            | NA           | NA            |
| 10.1007/s00122-016-2689-z       | F          | T      | NA               | NA               | NA             | NA            | NA           | NA            |
| 10.1038/srep26632               | F          | T      | NA               | NA               | NA             | NA            | NA           | NA            |
| 10.1371/journal.pone.0155760    | F          | F      | T                | NA               | NA             | NA            | NA           | NA            |
| 10.1371/journal.pone.0154609    | T          | NA     | NA               | NA               | NA             | NA            | NA           | NA            |
| 10.2135/cropsci2015.02.0111     | F          | T      | NA               | NA               | NA             | NA            | NA           | NA            |
| 10.2135/cropsci2015.10.0630     | F          | F      | F                | T                | UNEAK          | F             | F            | F             |
| 10.2135/cropsci2015.06.0390     | F          | F      | F                | T                | UNEAK          | F             | F            | F             |
| 10.1093/gbe/evw080              | F          | T      | NA               | NA               | NA             | NA            | NA           | NA            |
| 10.1111/mec.13584               | F          | T      | NA               | NA               | NA             | NA            | NA           | NA            |
| 10.1111/mec.13648               | T          | NA     | NA               | NA               | NA             | NA            | NA           | NA            |
| 10.1111/mec.13601               | T          | NA     | NA               | NA               | NA             | NA            | NA           | NA            |
| 10.1111/mec.13594               | F          | F      | F                | T                | Stacks         | F             | F            | T             |
| 10.1111/mec.13605               | F          | T      | NA               | NA               | NA             | NA            | NA           | NA            |
| 10.1002/ece3.2134               | F          | T      | NA               | NA               | NA             | NA            | NA           | NA            |
| 10.1007/s11032-016-0484-9       | F          | F      | F                | T                | UNEAK          | F             | F            | F             |
| 10.3732/ajb.1500519             | F          | T      | NA               | NA               | NA             | NA            | NA           | NA            |
| 10.1534/g3.116.026971           | F          | F      | T                | NA               | NA             | NA            | NA           | NA            |
| 10.1093/sysbio/syu046           | T          | NA     | NA               | NA               | NA             | NA            | NA           | NA            |
| 10.1007/s10681-016-1655-9       | F          | T      | NA               | NA               | NA             | NA            | NA           | NA            |
| 10.1094/MPMI-09-15-0218-R       | F          | T      | NA               | NA               | NA             | NA            | NA           | NA            |
| 10.1111/gcbb.12275              | F          | F      | F                | T                | UNEAK          | F             | F            | F             |
| 10.1111/1755-0998.12484         | T          | NA     | NA               | NA               | NA             | NA            | NA           | NA            |
| 10.1111/1755-0998.12493         | T          | NA     | NA               | NA               | NA             | NA            | NA           | NA            |
| 10.1111/1755-0998.12476         | F          | T      | NA               | NA               | NA             | NA            | NA           | NA            |
| 10.1111/1755-0998.12495         | F          | T      | NA               | NA               | NA             | NA            | NA           | NA            |
| 10.1007/s00122-016-2678-2       | T          | NA     | NA               | NA               | NA             | NA            | NA           | NA            |
| 10.1186/s12870-016-0779-3       | F          | T      | NA               | NA               | NA             | NA            | NA           | NA            |
| 10.1186/s12864-016-2583-8       | F          | T      | NA               | NA               | NA             | NA            | NA           | NA            |
| 10.1186/s12862-016-0647-7       | F          | F      | F                | T                | AftRAD         | F             | F            | F             |
| 10.1371/journal.pone.0152404    | T          | NA     | NA               | NA               | NA             | NA            | NA           | NA            |
| 10.1038/srep24050               | T          | NA     | NA               | NA               | NA             | NA            | NA           | NA            |
| 10.3390/ijms17040501            | F          | F      | T                | NA               | NA             | NA            | NA           | NA            |
| 10.1093/dnares/dsw004           | T          | NA     | NA               | NA               | NA             | NA            | NA           | NA            |
| 10.1111/evo.12891               | F          | F      | T                | NA               | NA             | NA            | NA           | NA            |
| 10.1111/evo.12897               | F          | T      | NA               | NA               | NA             | NA            | NA           | NA            |
| 10.1111/mec.13550               | T          | NA     | NA               | NA               | NA             | NA            | NA           | NA            |
| 10.1007/s11032-016-0443-5       | F          | T      | NA               | NA               | NA             | NA            | NA           | NA            |
| 10.1007/s11032-016-0472-0       | F          | F      | F                | T                | UNEAK          | F             | F            | F             |
| 10.1111/efp.12263               | F          | T      | NA               | NA               | NA             | NA            | NA           | NA            |
| 10.1534/g3.115.025775           | F          | F      | F                | T                | Minia          | F             | F            | F             |
| 10.1534/g3.115.024596           | T          | NA     | NA               | NA               | NA             | NA            | NA           | NA            |
| 10.1038/NMETH.3763              | T          | NA     | NA               | NA               | NA             | NA            | NA           | NA            |
| 10.1111/mec.13581               | F          | T      | NA               | NA               | NA             | NA            | NA           | NA            |
| 10.1111/pbi.12456               | T          | NA     | NA               | NA               | NA             | NA            | NA           | NA            |
| 10.1007/s00122-016-2664-8       | F          | T      | NA               | NA               | NA             | NA            | NA           | NA            |
| 10.1007/s10592-015-0784-3       | F          | F      | F                | T                | Stacks         | F             | F            | T             |
| 10.1007/s10336-015-1307-1       | F          | T      | NA               | NA               | NA             | NA            | NA           | NA            |
| 10.1007/s10681-015-1600-3       | F          | T      | NA               | NA               | NA             | NA            | NA           | NA            |
| 10.1038/hdy.2015.111            | F          | T      | NA               | NA               | NA             | NA            | NA           | NA            |
| 10.1371/journal.pone.0152569    | T          | NA     | NA               | NA               | NA             | NA            | NA           | NA            |
| 10.1371/journal.pone.0151651    | F          | F      | F                | T                | VSEARCH        | F             | F            | F             |
| 10.1186/s12864-016-2568-7       | F          | T      | NA               | NA               | NA             | NA            | NA           | NA            |
| 10.3389/fpls.2016.00289         | T          | NA     | NA               | NA               | NA             | NA            | NA           | NA            |

Continued on next page

Table S1 – continued from previous page

| DOI                               | No new GBS | One RE | Reference genome | de novo assembly | Software        | Percent match | k-mer length | Other setting |
|-----------------------------------|------------|--------|------------------|------------------|-----------------|---------------|--------------|---------------|
| 10.1186/s12864-016-2579-4         | T          | NA     | NA               | NA               | NA              | NA            | NA           | NA            |
| 10.1038/srep23092                 | T          | NA     | NA               | NA               | NA              | NA            | NA           | NA            |
| 10.1371/journal.pone.0149560      | F          | T      | NA               | NA               | NA              | NA            | NA           | NA            |
| 10.1371/journal.pone.0150692      | F          | T      | NA               | NA               | NA              | NA            | NA           | NA            |
| 10.1371/journal.pone.0151424      | F          | T      | NA               | NA               | NA              | NA            | NA           | NA            |
| 10.1186/s12870-016-0747-y         | T          | NA     | NA               | NA               | NA              | NA            | NA           | NA            |
| 10.1186/s12864-016-2555-z         | F          | T      | NA               | NA               | NA              | NA            | NA           | NA            |
| 10.3109/07388551.2014.959891      | T          | NA     | NA               | NA               | NA              | NA            | NA           | NA            |
| 10.3835/plantgenome2015.04.0028   | F          | F      | T                | NA               | NA              | NA            | NA           | NA            |
| 10.3835/plantgenome2014.10.0073   | F          | F      | F                | T                | UNEAK           | F             | F            | F             |
| 10.3835/plantgenome2015.07.0059   | F          | F      | F                | T                | UNEAK           | F             | F            | F             |
| 10.2135/cropsci2015.06.0332       | T          | NA     | NA               | NA               | NA              | NA            | NA           | NA            |
| 10.1270/jsbbs.66.213              | F          | F      | F                | T                | UNEAK           | F             | F            | F             |
| 10.1007/s12686-015-0513-8         | F          | T      | NA               | NA               | NA              | NA            | NA           | NA            |
| 10.1111/jipb.12452                | F          | T      | NA               | NA               | NA              | NA            | NA           | NA            |
| 10.1007/s10681-015-1612-z         | T          | NA     | NA               | NA               | NA              | NA            | NA           | NA            |
| 10.1534/g3.115.023432             | F          | F      | F                | T                | Stacks          | F             | F            | F             |
| 10.1371/journal.pone.0147875      | T          | NA     | NA               | NA               | NA              | NA            | NA           | NA            |
| 10.1111/mec.13545                 | F          | T      | NA               | NA               | NA              | NA            | NA           | NA            |
| 10.1111/mec.13537                 | T          | NA     | NA               | NA               | NA              | NA            | NA           | NA            |
| 10.1007/s10681-015-1610-1         | F          | T      | NA               | NA               | NA              | NA            | NA           | NA            |
| 10.1093/jhered/esv099             | F          | T      | NA               | NA               | NA              | NA            | NA           | NA            |
| 10.1093/sysbio/syv076             | F          | T      | NA               | NA               | NA              | NA            | NA           | NA            |
| 10.1093/sysbio/syv087             | F          | T      | NA               | NA               | NA              | NA            | NA           | NA            |
| 10.1016/j.aquaculture.2015.12.026 | F          | T      | NA               | NA               | NA              | NA            | NA           | NA            |
| 10.1186/s12864-016-2447-2         | F          | T      | NA               | NA               | NA              | NA            | NA           | NA            |
| 10.1038/hortres.2016.2            | T          | NA     | NA               | NA               | NA              | NA            | NA           | NA            |
| 10.1007/s11032-016-0442-6         | F          | F      | T                | NA               | NA              | NA            | NA           | NA            |
| 10.1007/s11032-015-0432-0         | F          | T      | NA               | NA               | NA              | NA            | NA           | NA            |
| 10.1371/journal.pgen.1005631      | T          | NA     | NA               | NA               | NA              | NA            | NA           | NA            |
| 10.1371/journal.pgen.1005887      | F          | T      | NA               | NA               | NA              | NA            | NA           | NA            |
| 10.1534/genetics.115.183665       | T          | NA     | NA               | NA               | NA              | NA            | NA           | NA            |
| 10.1007/s11295-015-0927-1         | T          | NA     | NA               | NA               | NA              | NA            | NA           | NA            |
| 10.1093/dnares/dsv034             | F          | F      | T                | NA               | NA              | NA            | NA           | NA            |
| 10.1002/ece3.1909                 | F          | T      | NA               | NA               | NA              | NA            | NA           | NA            |
| 10.1002/ece3.1928                 | F          | F      | F                | T                | Stacks          | F             | F            | F             |
| 10.1093/mollus/cyv042             | T          | NA     | NA               | NA               | NA              | NA            | NA           | NA            |
| 10.1016/j.margen.2015.10.010      | F          | F      | F                | T                | Stacks          | T             | F            | F             |
| 10.1111/mec.13487                 | F          | F      | F                | T                | custom pipeline | F             | F            | F             |
| 10.1007/s00438-015-1104-9         | F          | T      | NA               | NA               | NA              | NA            | NA           | NA            |
| 10.1016/j.ympcv.2015.11.009       | F          | T      | NA               | NA               | NA              | NA            | NA           | NA            |
| 10.1038/urg.2015.28               | T          | NA     | NA               | NA               | NA              | NA            | NA           | NA            |
| 10.1111/mpp.12269                 | F          | T      | NA               | NA               | NA              | NA            | NA           | NA            |
| 10.1007/s10592-015-0776-3         | F          | T      | NA               | NA               | NA              | NA            | NA           | NA            |
| 10.1007/s10750-015-2422-y         | F          | F      | F                | T                | DNASTar SeqMan  | F             | F            | F             |
| 10.1371/journal.pone.0147187      | T          | NA     | NA               | NA               | NA              | NA            | NA           | NA            |
| 10.1038/srep19427                 | T          | NA     | NA               | NA               | NA              | NA            | NA           | NA            |
| 10.1186/s12870-015-0696-x         | F          | T      | NA               | NA               | NA              | NA            | NA           | NA            |
| 10.1038/srep19244                 | F          | F      | F                | T                | RADtyping       | F             | F            | F             |
| 10.1186/s12859-016-0879-y         | T          | NA     | NA               | NA               | NA              | NA            | NA           | NA            |
| 10.1371/journal.pone.0146383      | F          | F      | F                | T                | UNEAK           | F             | F            | F             |
| 10.1186/s12864-015-2343-1         | T          | NA     | NA               | NA               | NA              | NA            | NA           | NA            |
| 10.5772/64593                     | T          | NA     | NA               | NA               | NA              | NA            | NA           | NA            |
| 10.1007/978-3-319-32274-2.7       | T          | NA     | NA               | NA               | NA              | NA            | NA           | NA            |
| 10.1007/978-3-319-32274-2.19      | T          | NA     | NA               | NA               | NA              | NA            | NA           | NA            |
| 10.1007/978-3-319-32274-2.20      | T          | NA     | NA               | NA               | NA              | NA            | NA           | NA            |
| 10.3198/jpr2014.09.0062crmp       | T          | NA     | NA               | NA               | NA              | NA            | NA           | NA            |
| 10.17660/ActaHortic.2016.1147.1   | T          | NA     | NA               | NA               | NA              | NA            | NA           | NA            |
| 10.17660/ActaHortic.2016.1147.7   | F          | F      | T                | NA               | NA              | NA            | NA           | NA            |
| 10.17660/ActaHortic.2016.1145.2   | T          | NA     | NA               | NA               | NA              | NA            | NA           | NA            |
| 10.17660/ActaHortic.2016.1118.19  | F          | F      | F                | T                | UNEAK           | F             | F            | F             |
| 10.5073/jka.2016.453.004          | T          | NA     | NA               | NA               | NA              | NA            | NA           | NA            |
| 10.4238/gmr.15038234              | T          | NA     | NA               | NA               | NA              | NA            | NA           | NA            |
| 10.1155/2016/3654093              | F          | T      | NA               | NA               | NA              | NA            | NA           | NA            |
| 10.1098/rsos.150565               | T          | NA     | NA               | NA               | NA              | NA            | NA           | NA            |
| 10.1080/23312009.2016.1158382     | T          | NA     | NA               | NA               | NA              | NA            | NA           | NA            |
| 10.4238/gmr.15017550              | F          | T      | NA               | NA               | NA              | NA            | NA           | NA            |
| 10.1111/2041-210X.12435           | T          | NA     | NA               | NA               | NA              | NA            | NA           | NA            |
| 10.1071/CP15149                   | T          | NA     | NA               | NA               | NA              | NA            | NA           | NA            |
| 10.7150/ijbs.13498                | T          | NA     | NA               | NA               | NA              | NA            | NA           | NA            |
| 10.1111/mec.13497                 | F          | T      | NA               | NA               | NA              | NA            | NA           | NA            |
| 10.1111/mec.13486                 | F          | T      | NA               | NA               | NA              | NA            | NA           | NA            |
| 10.1111/mec.13491                 | F          | T      | NA               | NA               | NA              | NA            | NA           | NA            |
| 10.1111/1755-0998.12427           | F          | T      | NA               | NA               | NA              | NA            | NA           | NA            |
| 10.1007/978-1-4939-3167-5.15      | T          | NA     | NA               | NA               | NA              | NA            | NA           | NA            |
| 10.1007/978-1-4939-3167-5.16      | T          | NA     | NA               | NA               | NA              | NA            | NA           | NA            |
| 10.2135/cropsci2015.06.0389       | F          | F      | T                | NA               | NA              | NA            | NA           | NA            |
| 10.1007/s11032-015-0431-1         | F          | F      | T                | NA               | NA              | NA            | NA           | NA            |
| 10.1007/s00122-015-2600-3         | F          | T      | NA               | NA               | NA              | NA            | NA           | NA            |
| 10.1007/s00122-015-2607-9         | F          | T      | NA               | NA               | NA              | NA            | NA           | NA            |
| 10.1007/s00122-015-2618-6         | T          | NA     | NA               | NA               | NA              | NA            | NA           | NA            |
| 10.1016/j.plantsci.2015.04.016    | T          | NA     | NA               | NA               | NA              | NA            | NA           | NA            |
| 10.1016/j.ympcv.2015.07.026       | F          | F      | T                | NA               | NA              | NA            | NA           | NA            |
| 10.1371/journal.pone.0145577      | T          | NA     | NA               | NA               | NA              | NA            | NA           | NA            |
| 10.1073/pnas.1512020112           | F          | T      | NA               | NA               | NA              | NA            | NA           | NA            |
| 10.1186/s12864-015-2312-8         | F          | T      | NA               | NA               | NA              | NA            | NA           | NA            |
| 10.1371/journal.pone.0145549      | T          | NA     | NA               | NA               | NA              | NA            | NA           | NA            |
| 10.1016/j.indcrop.2015.07.035     | F          | T      | NA               | NA               | NA              | NA            | NA           | NA            |

Continued on next page

Table S1 – continued from previous page

| DOI                             | No new GBS | One RE | Reference genome | de novo assembly | Software      | Percent match | k-mer length | Other setting |
|---------------------------------|------------|--------|------------------|------------------|---------------|---------------|--------------|---------------|
| 10.1186/s12864-015-2252-3       | F          | T      | NA               | NA               | NA            | NA            | NA           | NA            |
| 10.1186/s12864-015-2255-0       | F          | F      | F                | T                | UNEAK         | F             | F            | F             |
| 10.1371/journal.pone.0143193    | T          | NA     | NA               | NA               | NA            | NA            | NA           | NA            |
| 10.1038/srep17512               | F          | T      | NA               | NA               | NA            | NA            | NA           | NA            |
| 10.1111/mec.13477               | F          | T      | NA               | NA               | NA            | NA            | NA           | NA            |
| 10.1007/s11295-015-0944-0       | F          | F      | T                | NA               | NA            | NA            | NA           | NA            |
| 10.1007/s11295-015-0941-3       | F          | F      | T                | NA               | NA            | NA            | NA           | NA            |
| 10.1094/PHYTO-06-15-0136-R      | F          | T      | NA               | NA               | NA            | NA            | NA           | NA            |
| 10.1534/g3.115.020362           | F          | F      | F                | T                | custom TASSEL | F             | F            | F             |
| 10.1093/gbe/evv210              | T          | NA     | NA               | NA               | NA            | NA            | NA           | NA            |
| 10.1186/s12864-015-2212-y       | F          | T      | NA               | NA               | NA            | NA            | NA           | NA            |
| 10.1186/s13071-015-1230-6       | F          | F      | T                | NA               | NA            | NA            | NA           | NA            |
| 10.1016/j.ympv.2015.08.012      | F          | T      | NA               | NA               | NA            | NA            | NA           | NA            |
| 10.1038/srep17394               | F          | T      | NA               | NA               | NA            | NA            | NA           | NA            |
| 10.1186/s12864-015-2166-0       | F          | T      | NA               | NA               | NA            | NA            | NA           | NA            |
| 10.1371/journal.pone.0143665    | F          | T      | NA               | NA               | NA            | NA            | NA           | NA            |
| 10.1038/srep16916               | T          | NA     | NA               | NA               | NA            | NA            | NA           | NA            |
| 10.1038/srep16963               | T          | NA     | NA               | NA               | NA            | NA            | NA           | NA            |
| 10.1186/s12864-015-2112-1       | F          | T      | NA               | NA               | NA            | NA            | NA           | NA            |
| 10.1371/journal.pone.0142602    | T          | NA     | NA               | NA               | NA            | NA            | NA           | NA            |
| 10.1186/s12864-015-2180-2       | F          | T      | NA               | NA               | NA            | NA            | NA           | NA            |
| 10.3835/plantgenome2015.01.0003 | F          | F      | F                | T                | UNEAK         | F             | F            | F             |
| 10.3835/plantgenome2015.07.0054 | F          | T      | NA               | NA               | NA            | NA            | NA           | NA            |
| 10.3390/ijms161125951           | F          | T      | NA               | NA               | NA            | NA            | NA           | NA            |
| 10.1534/genetics.115.180968     | F          | T      | NA               | NA               | NA            | NA            | NA           | NA            |
| 10.1007/s11032-015-0405-3       | F          | T      | NA               | NA               | NA            | NA            | NA           | NA            |
| 10.1007/s11032-015-0404-4       | T          | NA     | NA               | NA               | NA            | NA            | NA           | NA            |
| 10.1534/g3.115.021667           | T          | NA     | NA               | NA               | NA            | NA            | NA           | NA            |
| 10.1111/mec.13402               | F          | F      | T                | NA               | NA            | NA            | NA           | NA            |
| 10.1111/1365-2745.12473         | F          | F      | F                | T                | UNEAK         | F             | F            | F             |
| 10.1111/1755-0998.12404         | T          | NA     | NA               | NA               | NA            | NA            | NA           | NA            |
| 10.1111/1755-0998.12406         | T          | NA     | NA               | NA               | NA            | NA            | NA           | NA            |
| 10.1111/1755-0998.12412         | T          | NA     | NA               | NA               | NA            | NA            | NA           | NA            |
| 10.1111/1755-0998.12400         | F          | T      | NA               | NA               | NA            | NA            | NA           | NA            |
| 10.1093/sysbio/syv053           | T          | NA     | NA               | NA               | NA            | NA            | NA           | NA            |
| 10.1371/journal.pone.0141940    | T          | NA     | NA               | NA               | NA            | NA            | NA           | NA            |
| 10.1371/journal.pone.0140462    | T          | NA     | NA               | NA               | NA            | NA            | NA           | NA            |
| 10.1371/journal.pone.0140175    | F          | T      | NA               | NA               | NA            | NA            | NA           | NA            |
| 10.1186/s40709-015-0034-3       | F          | T      | NA               | NA               | NA            | NA            | NA           | NA            |
| 10.1038/srep14852               | F          | T      | NA               | NA               | NA            | NA            | NA           | NA            |
| 10.1016/j.molp.2015.05.004      | T          | NA     | NA               | NA               | NA            | NA            | NA           | NA            |
| 10.1186/s12864-015-1946-x       | F          | F      | T                | NA               | NA            | NA            | NA           | NA            |
| 10.3389/fpls.2015.00813         | F          | T      | NA               | NA               | NA            | NA            | NA           | NA            |
| 10.1371/journal.pone.0139406    | F          | T      | NA               | NA               | NA            | NA            | NA           | NA            |
| 10.1371/journal.pone.0139840    | F          | T      | NA               | NA               | NA            | NA            | NA           | NA            |
| 10.1643/CH-15-248               | T          | NA     | NA               | NA               | NA            | NA            | NA           | NA            |
| 10.1111/eva.12301               | F          | F      | T                | NA               | NA            | NA            | NA           | NA            |
| 10.1111/mec.13395               | F          | T      | NA               | NA               | NA            | NA            | NA           | NA            |
| 10.1111/mec.13370               | F          | T      | NA               | NA               | NA            | NA            | NA           | NA            |
| 10.1007/s00122-015-2559-0       | F          | T      | NA               | NA               | NA            | NA            | NA           | NA            |
| 10.1371/journal.pone.0138931    | F          | T      | NA               | NA               | NA            | NA            | NA           | NA            |
| 10.3389/fgene.2015.00298        | F          | T      | NA               | NA               | NA            | NA            | NA           | NA            |
| 10.1186/s12863-015-0273-1       | F          | T      | NA               | NA               | NA            | NA            | NA           | NA            |
| 10.1371/journal.pone.0137746    | F          | F      | F                | T                | Stacks        | F             | F            | F             |
| 10.1371/journal.pone.0131800    | F          | T      | NA               | NA               | NA            | NA            | NA           | NA            |
| 10.1186/s12915-015-0187-4       | F          | T      | NA               | NA               | NA            | NA            | NA           | NA            |
| 10.1371/journal.pone.0138435    | F          | T      | NA               | NA               | NA            | NA            | NA           | NA            |
| 10.1186/s12862-015-0480-4       | F          | F      | T                | NA               | NA            | NA            | NA           | NA            |
| 10.1186/s12711-015-0148-y       | F          | T      | NA               | NA               | NA            | NA            | NA           | NA            |
| 10.1371/journal.pone.0137077    | F          | T      | NA               | NA               | NA            | NA            | NA           | NA            |
| 10.1111/jse.12174               | T          | NA     | NA               | NA               | NA            | NA            | NA           | NA            |
| 10.1111/jse.12176               | F          | T      | NA               | NA               | NA            | NA            | NA           | NA            |
| 10.1371/journal.pntd.0004077    | F          | T      | NA               | NA               | NA            | NA            | NA           | NA            |
| 10.1093/gbe/evv168              | T          | NA     | NA               | NA               | NA            | NA            | NA           | NA            |
| 10.1093/jhered/esv045           | F          | T      | NA               | NA               | NA            | NA            | NA           | NA            |
| 10.1093/jxb/erv239              | T          | NA     | NA               | NA               | NA            | NA            | NA           | NA            |
| 10.1093/jxb/erv258              | T          | NA     | NA               | NA               | NA            | NA            | NA           | NA            |
| 10.1111/mec.13350               | F          | T      | NA               | NA               | NA            | NA            | NA           | NA            |
| 10.1111/mec.13340               | F          | F      | F                | T                | Stacks        | F             | F            | F             |
| 10.1111/pcmr.12386              | F          | F      | T                | NA               | NA            | NA            | NA           | NA            |
| 10.1007/s00122-015-2551-8       | T          | NA     | NA               | NA               | NA            | NA            | NA           | NA            |
| 10.1007/s12686-015-0454-2       | F          | T      | NA               | NA               | NA            | NA            | NA           | NA            |
| 10.1111/1755-0998.12369         | F          | T      | NA               | NA               | NA            | NA            | NA           | NA            |
| 10.1111/1755-0998.12376         | F          | F      | F                | T                | Stacks        | NA            | NA           | NA            |
| 10.1111/1755-0998.12392         | F          | F      | F                | T                | Mira          | F             | F            | F             |

Table S2: Assembler results for all simulations derived from the *A. thaliana* genome. Simulations were used to explore the impact of the number of mutations (overall and per locus), the proportion of mutations that were indels and the size of indels, on assembly performance across five different assemblers (i.e., CD-HIT, Stacks, Stacks2, VSEARCH, and Velvet), with varying percent match and k-mer lengths (when appropriate). Detailed descriptions of each simulation can be found in Table 1 of the main text. Assembly results were compared using two different metrics, the proportion of contigs that match genome fragments (completeness) and over-under assembly ratio (contigs:fragments). The completeness proportion includes exact sequence matches as well as close matches (see main text methods for clarification). K-mer length is left blank in the case of CD-HIT entries, because CD-HIT does not use k-mer length as a parameter setting.

| Assembler | Simulation      | Percent match | K-mer length | Completeness | Contig/Fragment Ratio |
|-----------|-----------------|---------------|--------------|--------------|-----------------------|
| CD-HIT    | Original Genome | 94            | -            | 0.98         | 0.98                  |
| CD-HIT    | Original Genome | 98            | -            | 0.99         | 0.99                  |
| CD-HIT    | Original Genome | 90            | -            | 0.96         | 0.96                  |
| Stacks    | Original Genome | 90            | 15           | 0.98         | 0.98                  |
| Stacks    | Original Genome | 98            | 15           | 0.99         | 0.99                  |
| Stacks    | Original Genome | 94            | 15           | 0.98         | 0.98                  |
| Stacks    | Original Genome | 90            | 31           | 0.98         | 0.98                  |
| Stacks    | Original Genome | 98            | 31           | 0.99         | 0.99                  |
| Stacks    | Original Genome | 94            | 31           | 0.98         | 0.98                  |
| Stacks    | Original Genome | 90            | opt          | 0.98         | 0.98                  |
| Stacks    | Original Genome | 98            | opt          | 0.99         | 0.99                  |
| Stacks    | Original Genome | 94            | opt          | 0.98         | 0.98                  |
| VSEARCH   | Original Genome | 90            | 15           | 0.96         | 2.07                  |
| VSEARCH   | Original Genome | 90            | 8            | 0.96         | 0.96                  |
| VSEARCH   | Original Genome | 94            | 15           | 0.97         | 2.08                  |
| VSEARCH   | Original Genome | 94            | 8            | 0.97         | 0.97                  |
| VSEARCH   | Original Genome | 98            | 15           | 0.99         | 2.10                  |
| VSEARCH   | Original Genome | 98            | 8            | 0.99         | 0.99                  |
| Velvet    | Original Genome | 98            | 15           | 0.83         | 0.98                  |
| Velvet    | Original Genome | 94            | 15           | 0.83         | 0.98                  |
| Velvet    | Original Genome | 90            | 15           | 0.83         | 0.98                  |
| Velvet    | Original Genome | 98            | 31           | 0.95         | 0.95                  |
| Velvet    | Original Genome | 94            | 31           | 0.95         | 0.95                  |
| Velvet    | Original Genome | 90            | 31           | 0.95         | 0.95                  |
| Stacks2   | Original Genome | 98            | opt          | 0.99         | 0.99                  |
| Stacks2   | Original Genome | 90            | 15           | 0.95         | 0.96                  |
| Stacks2   | Original Genome | 94            | 15           | 0.96         | 0.97                  |
| Stacks2   | Original Genome | 94            | 31           | 0.97         | 0.97                  |
| Stacks2   | Original Genome | 98            | 31           | 0.99         | 0.99                  |
| Stacks2   | Original Genome | 94            | opt          | 0.96         | 0.97                  |
| Stacks2   | Original Genome | 90            | opt          | 0.95         | 0.96                  |
| Stacks2   | Original Genome | 90            | 31           | 0.96         | 0.97                  |
| Stacks2   | Original Genome | 98            | 15           | 0.98         | 0.99                  |
| CD-HIT    | A few SNPs      | 94            | -            | 0.97         | 0.97                  |
| CD-HIT    | A few SNPs      | 98            | -            | 0.99         | 1.03                  |

Continued on next page



Table S2 – continued from previous page

| Assembler | Simulation | Percent match | K-mer length | Completeness | Contig/Fragment Ratio |
|-----------|------------|---------------|--------------|--------------|-----------------------|
| CD-HIT    | A few SNPs | 90            | -            | 0.96         | 0.96                  |
| Stacks    | A few SNPs | 90            | 15           | 0.98         | 0.98                  |
| Stacks    | A few SNPs | 98            | 15           | 0.98         | 0.99                  |
| Stacks    | A few SNPs | 94            | 15           | 0.98         | 0.98                  |
| Stacks    | A few SNPs | 90            | 31           | 0.98         | 0.98                  |
| Stacks    | A few SNPs | 98            | 31           | 0.98         | 0.99                  |
| Stacks    | A few SNPs | 94            | 31           | 0.98         | 0.98                  |
| Stacks    | A few SNPs | 90            | opt          | 0.98         | 0.98                  |
| Stacks    | A few SNPs | 98            | opt          | 0.98         | 0.99                  |
| Stacks    | A few SNPs | 94            | opt          | 0.98         | 0.98                  |
| VSEARCH   | A few SNPs | 90            | 15           | 0.96         | 2.16                  |
| VSEARCH   | A few SNPs | 90            | 8            | 0.96         | 1.16                  |
| VSEARCH   | A few SNPs | 94            | 15           | 0.97         | 2.17                  |
| VSEARCH   | A few SNPs | 94            | 8            | 0.97         | 1.17                  |
| VSEARCH   | A few SNPs | 98            | 15           | 0.99         | 2.24                  |
| VSEARCH   | A few SNPs | 98            | 8            | 0.99         | 1.23                  |
| Velvet    | A few SNPs | 98            | 15           | 0.61         | 1.03                  |
| Velvet    | A few SNPs | 94            | 15           | 0.61         | 1.03                  |
| Velvet    | A few SNPs | 90            | 15           | 0.76         | 0.99                  |
| Velvet    | A few SNPs | 98            | 31           | 0.82         | 0.84                  |
| Velvet    | A few SNPs | 94            | 31           | 0.92         | 0.92                  |
| Velvet    | A few SNPs | 90            | 31           | 0.92         | 0.92                  |
| Stacks2   | A few SNPs | 94            | 15           | 0.96         | 0.96                  |
| Stacks2   | A few SNPs | 90            | 31           | 0.96         | 0.96                  |
| Stacks2   | A few SNPs | 98            | 15           | 0.98         | 0.98                  |
| Stacks2   | A few SNPs | 94            | 31           | 0.96         | 0.97                  |
| Stacks2   | A few SNPs | 98            | 31           | 0.98         | 0.98                  |
| Stacks2   | A few SNPs | 98            | opt          | 0.98         | 0.98                  |
| Stacks2   | A few SNPs | 94            | opt          | 0.96         | 0.97                  |
| Stacks2   | A few SNPs | 90            | opt          | 0.95         | 0.96                  |
| Stacks2   | A few SNPs | 90            | 15           | 0.95         | 0.96                  |
| CD-HIT    | More SNPs  | 94            | -            | 0.97         | 0.97                  |
| CD-HIT    | More SNPs  | 98            | -            | 0.99         | 1.04                  |
| CD-HIT    | More SNPs  | 90            | -            | 0.96         | 0.96                  |
| Stacks    | More SNPs  | 90            | 15           | 0.98         | 0.98                  |
| Stacks    | More SNPs  | 98            | 15           | 0.98         | 0.99                  |
| Stacks    | More SNPs  | 94            | 15           | 0.98         | 0.98                  |
| Stacks    | More SNPs  | 90            | 31           | 0.98         | 0.98                  |
| Stacks    | More SNPs  | 98            | 31           | 0.98         | 0.99                  |
| Stacks    | More SNPs  | 94            | 31           | 0.98         | 0.98                  |
| Stacks    | More SNPs  | 90            | opt          | 0.98         | 0.98                  |
| Stacks    | More SNPs  | 98            | opt          | 0.98         | 0.99                  |
| Stacks    | More SNPs  | 94            | opt          | 0.98         | 0.98                  |
| VSEARCH   | More SNPs  | 90            | 15           | 0.96         | 2.05                  |
| VSEARCH   | More SNPs  | 90            | 8            | 0.96         | 0.96                  |
| VSEARCH   | More SNPs  | 94            | 15           | 0.97         | 2.07                  |
| VSEARCH   | More SNPs  | 94            | 8            | 0.97         | 0.97                  |
| VSEARCH   | More SNPs  | 98            | 15           | 0.99         | 2.14                  |
| VSEARCH   | More SNPs  | 98            | 8            | 0.99         | 1.04                  |
| Velvet    | More SNPs  | 98            | 15           | 0.59         | 1.02                  |

Continued on next page

Table S2 – continued from previous page

| Assembler | Simulation               | Percent match | K-mer length | Completeness | Contig/Fragment Ratio |
|-----------|--------------------------|---------------|--------------|--------------|-----------------------|
| Velvet    | More SNPs                | 94            | 15           | 0.59         | 1.02                  |
| Velvet    | More SNPs                | 90            | 15           | 0.76         | 0.99                  |
| Velvet    | More SNPs                | 98            | 31           | 0.82         | 0.83                  |
| Velvet    | More SNPs                | 94            | 31           | 0.92         | 0.92                  |
| Velvet    | More SNPs                | 90            | 31           | 0.92         | 0.92                  |
| Stacks2   | More SNPs                | 98            | opt          | 0.98         | 0.98                  |
| Stacks2   | More SNPs                | 90            | 31           | 0.96         | 0.96                  |
| Stacks2   | More SNPs                | 98            | 15           | 0.98         | 0.98                  |
| Stacks2   | More SNPs                | 90            | opt          | 0.95         | 0.96                  |
| Stacks2   | More SNPs                | 94            | 15           | 0.96         | 0.96                  |
| Stacks2   | More SNPs                | 94            | 31           | 0.96         | 0.97                  |
| Stacks2   | More SNPs                | 94            | opt          | 0.96         | 0.96                  |
| Stacks2   | More SNPs                | 90            | 15           | 0.95         | 0.96                  |
| Stacks2   | More SNPs                | 98            | 31           | 0.98         | 0.98                  |
| CD-HIT    | Multiple SNPs per locus  | 94            | -            | 0.97         | 0.97                  |
| CD-HIT    | Multiple SNPs per locus  | 98            | -            | 0.99         | 1.09                  |
| CD-HIT    | Multiple SNPs per locus  | 90            | -            | 0.96         | 0.96                  |
| Stacks    | Multiple SNPs per locus  | 90            | 15           | 0.97         | 0.97                  |
| Stacks    | Multiple SNPs per locus  | 98            | 15           | 0.98         | 1.00                  |
| Stacks    | Multiple SNPs per locus  | 94            | 15           | 0.98         | 0.98                  |
| Stacks    | Multiple SNPs per locus  | 90            | 31           | 0.97         | 0.98                  |
| Stacks    | Multiple SNPs per locus  | 98            | 31           | 0.98         | 1.00                  |
| Stacks    | Multiple SNPs per locus  | 94            | 31           | 0.98         | 0.98                  |
| Stacks    | Multiple SNPs per locus  | 90            | opt          | 0.97         | 0.97                  |
| Stacks    | Multiple SNPs per locus  | 98            | opt          | 0.98         | 1.00                  |
| Stacks    | Multiple SNPs per locus  | 94            | opt          | 0.98         | 0.98                  |
| VSEARCH   | Multiple SNPs per locus  | 90            | 15           | 0.96         | 2.05                  |
| VSEARCH   | Multiple SNPs per locus  | 90            | 8            | 0.96         | 0.96                  |
| VSEARCH   | Multiple SNPs per locus  | 94            | 15           | 0.97         | 2.06                  |
| VSEARCH   | Multiple SNPs per locus  | 94            | 8            | 0.97         | 0.97                  |
| VSEARCH   | Multiple SNPs per locus  | 98            | 15           | 0.99         | 2.18                  |
| VSEARCH   | Multiple SNPs per locus  | 98            | 8            | 0.99         | 1.09                  |
| Velvet    | Multiple SNPs per locus  | 98            | 15           | 0.51         | 1.05                  |
| Velvet    | Multiple SNPs per locus  | 94            | 15           | 0.51         | 1.05                  |
| Velvet    | Multiple SNPs per locus  | 90            | 15           | 0.73         | 0.99                  |
| Velvet    | Multiple SNPs per locus  | 98            | 31           | 0.79         | 0.80                  |
| Velvet    | Multiple SNPs per locus  | 94            | 31           | 0.91         | 0.92                  |
| Velvet    | Multiple SNPs per locus  | 90            | 31           | 0.91         | 0.92                  |
| Stacks2   | Multiple SNPs per locus  | 98            | 15           | 0.98         | 1.00                  |
| Stacks2   | Multiple SNPs per locus  | 94            | opt          | 0.95         | 0.96                  |
| Stacks2   | Multiple SNPs per locus  | 90            | 31           | 0.95         | 0.96                  |
| Stacks2   | Multiple SNPs per locus  | 90            | 15           | 0.95         | 0.96                  |
| Stacks2   | Multiple SNPs per locus  | 98            | 31           | 0.98         | 1.00                  |
| Stacks2   | Multiple SNPs per locus  | 94            | 31           | 0.96         | 0.96                  |
| Stacks2   | Multiple SNPs per locus  | 90            | opt          | 0.94         | 0.95                  |
| Stacks2   | Multiple SNPs per locus  | 94            | 15           | 0.96         | 0.96                  |
| Stacks2   | Multiple SNPs per locus  | 98            | opt          | 0.98         | 1.00                  |
| CD-HIT    | Mostly SNPs + few indels | 94            | -            | 0.97         | 0.97                  |
| CD-HIT    | Mostly SNPs + few indels | 98            | -            | 0.99         | 1.03                  |
| CD-HIT    | Mostly SNPs + few indels | 90            | -            | 0.96         | 0.96                  |

Continued on next page

Table S2 – continued from previous page

| Assembler | Simulation               | Percent match | K-mer length | Completeness | Contig/Fragment Ratio |
|-----------|--------------------------|---------------|--------------|--------------|-----------------------|
| Stacks    | Mostly SNPs + few indels | 90            | 15           | 0.98         | 1.01                  |
| Stacks    | Mostly SNPs + few indels | 98            | 15           | 0.99         | 1.02                  |
| Stacks    | Mostly SNPs + few indels | 94            | 15           | 0.98         | 1.01                  |
| Stacks    | Mostly SNPs + few indels | 90            | 31           | 0.98         | 1.01                  |
| Stacks    | Mostly SNPs + few indels | 98            | 31           | 0.99         | 1.02                  |
| Stacks    | Mostly SNPs + few indels | 94            | 31           | 0.98         | 1.01                  |
| Stacks    | Mostly SNPs + few indels | 90            | opt          | 0.98         | 1.01                  |
| Stacks    | Mostly SNPs + few indels | 98            | opt          | 0.99         | 1.02                  |
| Stacks    | Mostly SNPs + few indels | 94            | opt          | 0.98         | 1.01                  |
| VSEARCH   | Mostly SNPs + few indels | 90            | 15           | 0.96         | 2.05                  |
| VSEARCH   | Mostly SNPs + few indels | 90            | 8            | 0.96         | 1.10                  |
| VSEARCH   | Mostly SNPs + few indels | 94            | 15           | 0.97         | 2.07                  |
| VSEARCH   | Mostly SNPs + few indels | 94            | 8            | 0.97         | 1.11                  |
| VSEARCH   | Mostly SNPs + few indels | 98            | 15           | 0.99         | 2.13                  |
| VSEARCH   | Mostly SNPs + few indels | 98            | 8            | 0.99         | 1.17                  |
| Velvet    | Mostly SNPs + few indels | 98            | 15           | 0.60         | 1.04                  |
| Velvet    | Mostly SNPs + few indels | 94            | 15           | 0.60         | 1.04                  |
| Velvet    | Mostly SNPs + few indels | 90            | 15           | 0.75         | 0.99                  |
| Velvet    | Mostly SNPs + few indels | 98            | 31           | 0.81         | 0.84                  |
| Velvet    | Mostly SNPs + few indels | 94            | 31           | 0.90         | 0.92                  |
| Velvet    | Mostly SNPs + few indels | 90            | 31           | 0.90         | 0.92                  |
| Stacks2   | Mostly SNPs + few indels | 94            | 31           | 0.93         | 0.97                  |
| Stacks2   | Mostly SNPs + few indels | 90            | opt          | 0.92         | 0.96                  |
| Stacks2   | Mostly SNPs + few indels | 90            | 31           | 0.92         | 0.96                  |
| Stacks2   | Mostly SNPs + few indels | 98            | opt          | 0.94         | 0.98                  |
| Stacks2   | Mostly SNPs + few indels | 98            | 15           | 0.94         | 0.98                  |
| Stacks2   | Mostly SNPs + few indels | 90            | 15           | 0.92         | 0.96                  |
| Stacks2   | Mostly SNPs + few indels | 98            | 31           | 0.94         | 0.98                  |
| Stacks2   | Mostly SNPs + few indels | 94            | opt          | 0.92         | 0.96                  |
| Stacks2   | Mostly SNPs + few indels | 94            | 15           | 0.92         | 0.97                  |
| CD-HIT    | 50:50 SNPs:indels        | 94            | -            | 0.97         | 0.97                  |
| CD-HIT    | 50:50 SNPs:indels        | 98            | -            | 0.99         | 1.03                  |
| CD-HIT    | 50:50 SNPs:indels        | 90            | -            | 0.96         | 0.96                  |
| Stacks    | 50:50 SNPs:indels        | 90            | 15           | 0.98         | 1.13                  |
| Stacks    | 50:50 SNPs:indels        | 98            | 15           | 0.99         | 1.16                  |
| Stacks    | 50:50 SNPs:indels        | 94            | 15           | 0.98         | 1.15                  |
| Stacks    | 50:50 SNPs:indels        | 90            | 31           | 0.98         | 1.13                  |
| Stacks    | 50:50 SNPs:indels        | 98            | 31           | 0.99         | 1.16                  |
| Stacks    | 50:50 SNPs:indels        | 94            | 31           | 0.98         | 1.15                  |
| Stacks    | 50:50 SNPs:indels        | 90            | opt          | 0.98         | 1.13                  |
| Stacks    | 50:50 SNPs:indels        | 98            | opt          | 0.99         | 1.16                  |
| Stacks    | 50:50 SNPs:indels        | 94            | opt          | 0.98         | 1.15                  |
| VSEARCH   | 50:50 SNPs:indels        | 90            | 15           | 0.96         | 2.06                  |
| VSEARCH   | 50:50 SNPs:indels        | 90            | 8            | 0.96         | 0.96                  |
| VSEARCH   | 50:50 SNPs:indels        | 94            | 15           | 0.97         | 2.07                  |
| VSEARCH   | 50:50 SNPs:indels        | 94            | 8            | 0.97         | 0.97                  |
| VSEARCH   | 50:50 SNPs:indels        | 98            | 15           | 0.99         | 2.14                  |
| VSEARCH   | 50:50 SNPs:indels        | 98            | 8            | 0.99         | 1.04                  |
| Velvet    | 50:50 SNPs:indels        | 98            | 15           | 0.58         | 1.03                  |
| Velvet    | 50:50 SNPs:indels        | 94            | 15           | 0.58         | 1.03                  |

Continued on next page

Table S2 – continued from previous page

| Assembler | Simulation                    | Percent match | K-mer length | Completeness | Contig/Fragment Ratio |
|-----------|-------------------------------|---------------|--------------|--------------|-----------------------|
| Velvet    | 50:50 SNPs:indels             | 90            | 15           | 0.71         | 0.99                  |
| Velvet    | 50:50 SNPs:indels             | 98            | 31           | 0.80         | 0.83                  |
| Velvet    | 50:50 SNPs:indels             | 94            | 31           | 0.88         | 0.92                  |
| Velvet    | 50:50 SNPs:indels             | 90            | 31           | 0.88         | 0.92                  |
| Stacks2   | 50:50 SNPs:indels             | 90            | 31           | 0.79         | 0.96                  |
| Stacks2   | 50:50 SNPs:indels             | 98            | opt          | 0.81         | 0.98                  |
| Stacks2   | 50:50 SNPs:indels             | 94            | 31           | 0.79         | 0.97                  |
| Stacks2   | 50:50 SNPs:indels             | 94            | opt          | 0.79         | 0.97                  |
| Stacks2   | 50:50 SNPs:indels             | 94            | 15           | 0.79         | 0.97                  |
| Stacks2   | 50:50 SNPs:indels             | 98            | 15           | 0.81         | 0.98                  |
| Stacks2   | 50:50 SNPs:indels             | 90            | opt          | 0.78         | 0.96                  |
| Stacks2   | 50:50 SNPs:indels             | 98            | 31           | 0.81         | 0.98                  |
| Stacks2   | 50:50 SNPs:indels             | 90            | 15           | 0.78         | 0.96                  |
| CD-HIT    | Only indels                   | 94            | -            | 0.97         | 0.97                  |
| CD-HIT    | Only indels                   | 98            | -            | 0.99         | 1.02                  |
| CD-HIT    | Only indels                   | 90            | -            | 0.96         | 0.96                  |
| Stacks    | Only indels                   | 90            | 15           | 0.98         | 1.27                  |
| Stacks    | Only indels                   | 98            | 15           | 0.99         | 1.33                  |
| Stacks    | Only indels                   | 94            | 15           | 0.99         | 1.30                  |
| Stacks    | Only indels                   | 90            | 31           | 0.99         | 1.27                  |
| Stacks    | Only indels                   | 98            | 31           | 0.99         | 1.33                  |
| Stacks    | Only indels                   | 94            | 31           | 0.99         | 1.30                  |
| Stacks    | Only indels                   | 90            | opt          | 0.98         | 1.27                  |
| Stacks    | Only indels                   | 98            | opt          | 0.99         | 1.33                  |
| Stacks    | Only indels                   | 94            | opt          | 0.99         | 1.30                  |
| VSEARCH   | Only indels                   | 90            | 8            | 0.96         | 1.05                  |
| VSEARCH   | Only indels                   | 94            | 15           | 0.97         | 2.07                  |
| VSEARCH   | Only indels                   | 94            | 8            | 0.97         | 1.06                  |
| VSEARCH   | Only indels                   | 98            | 15           | 0.99         | 2.15                  |
| VSEARCH   | Only indels                   | 98            | 8            | 0.99         | 1.15                  |
| VSEARCH   | Only indels                   | 90            | 15           | 0.96         | 2.06                  |
| Velvet    | Only indels                   | 98            | 15           | 0.59         | 1.00                  |
| Velvet    | Only indels                   | 94            | 15           | 0.59         | 1.00                  |
| Velvet    | Only indels                   | 90            | 15           | 0.67         | 0.98                  |
| Velvet    | Only indels                   | 98            | 31           | 0.78         | 0.84                  |
| Velvet    | Only indels                   | 94            | 31           | 0.83         | 0.92                  |
| Velvet    | Only indels                   | 90            | 31           | 0.83         | 0.92                  |
| Stacks2   | Only indels                   | 94            | opt          | 0.63         | 0.97                  |
| Stacks2   | Only indels                   | 98            | 31           | 0.64         | 0.98                  |
| Stacks2   | Only indels                   | 90            | 15           | 0.62         | 0.96                  |
| Stacks2   | Only indels                   | 90            | 31           | 0.63         | 0.97                  |
| Stacks2   | Only indels                   | 90            | opt          | 0.62         | 0.96                  |
| Stacks2   | Only indels                   | 94            | 31           | 0.63         | 0.97                  |
| Stacks2   | Only indels                   | 98            | 15           | 0.64         | 0.98                  |
| Stacks2   | Only indels                   | 98            | opt          | 0.64         | 0.98                  |
| Stacks2   | Only indels                   | 94            | 15           | 0.63         | 0.97                  |
| CD-HIT    | Only indels, short-mid length | 94            | -            | 0.97         | 0.98                  |
| CD-HIT    | Only indels, short-mid length | 98            | -            | 0.99         | 1.22                  |
| CD-HIT    | Only indels, short-mid length | 90            | -            | 0.96         | 0.96                  |
| Stacks    | Only indels, short-mid length | 90            | 15           | 0.98         | 1.28                  |

Continued on next page

Table S2 – continued from previous page

| Assembler | Simulation                     | Percent match | K-mer length | Completeness | Contig/Fragment Ratio |
|-----------|--------------------------------|---------------|--------------|--------------|-----------------------|
| Stacks    | Only indels, short-mid length  | 98            | 15           | 0.99         | 1.32                  |
| Stacks    | Only indels, short-mid length  | 94            | 15           | 0.99         | 1.30                  |
| Stacks    | Only indels, short-mid length  | 90            | 31           | 0.99         | 1.28                  |
| Stacks    | Only indels, short-mid length  | 98            | 31           | 0.99         | 1.32                  |
| Stacks    | Only indels, short-mid length  | 94            | 31           | 0.99         | 1.30                  |
| Stacks    | Only indels, short-mid length  | 90            | opt          | 0.98         | 1.28                  |
| Stacks    | Only indels, short-mid length  | 98            | opt          | 0.99         | 1.32                  |
| Stacks    | Only indels, short-mid length  | 94            | opt          | 0.99         | 1.30                  |
| VSEARCH   | Only indels, short-mid length  | 90            | 8            | 0.96         | 0.96                  |
| VSEARCH   | Only indels, short-mid length  | 94            | 15           | 0.97         | 2.08                  |
| VSEARCH   | Only indels, short-mid length  | 94            | 8            | 0.97         | 0.98                  |
| VSEARCH   | Only indels, short-mid length  | 98            | 15           | 0.99         | 2.32                  |
| VSEARCH   | Only indels, short-mid length  | 98            | 8            | 0.99         | 1.23                  |
| VSEARCH   | Only indels, short-mid length  | 90            | 15           | 0.96         | 2.06                  |
| Velvet    | Only indels, short-mid length  | 98            | 15           | 0.58         | 1.00                  |
| Velvet    | Only indels, short-mid length  | 94            | 15           | 0.58         | 1.00                  |
| Velvet    | Only indels, short-mid length  | 90            | 15           | 0.62         | 0.99                  |
| Velvet    | Only indels, short-mid length  | 98            | 31           | 0.77         | 0.84                  |
| Velvet    | Only indels, short-mid length  | 94            | 31           | 0.79         | 0.87                  |
| Velvet    | Only indels, short-mid length  | 90            | 31           | 0.82         | 0.92                  |
| Stacks2   | Only indels, short-mid length  | 94            | 15           | 0.64         | 0.97                  |
| Stacks2   | Only indels, short-mid length  | 98            | 15           | 0.65         | 0.99                  |
| Stacks2   | Only indels, short-mid length  | 90            | 31           | 0.64         | 0.97                  |
| Stacks2   | Only indels, short-mid length  | 90            | opt          | 0.63         | 0.96                  |
| Stacks2   | Only indels, short-mid length  | 94            | 31           | 0.64         | 0.97                  |
| Stacks2   | Only indels, short-mid length  | 90            | 15           | 0.63         | 0.96                  |
| Stacks2   | Only indels, short-mid length  | 98            | opt          | 0.65         | 0.99                  |
| Stacks2   | Only indels, short-mid length  | 94            | opt          | 0.64         | 0.97                  |
| Stacks2   | Only indels, short-mid length  | 98            | 31           | 0.65         | 0.99                  |
| CD-HIT    | Only indels, short-long length | 94            | -            | 0.98         | 1.00                  |
| CD-HIT    | Only indels, short-long length | 98            | -            | 1.00         | 1.28                  |
| CD-HIT    | Only indels, short-long length | 90            | -            | 0.96         | 0.96                  |
| Stacks    | Only indels, short-long length | 90            | 15           | 0.99         | 1.28                  |
| Stacks    | Only indels, short-long length | 98            | 15           | 0.99         | 1.34                  |
| Stacks    | Only indels, short-long length | 94            | 15           | 0.99         | 1.31                  |
| Stacks    | Only indels, short-long length | 90            | 31           | 0.99         | 1.28                  |
| Stacks    | Only indels, short-long length | 98            | 31           | 0.99         | 1.34                  |
| Stacks    | Only indels, short-long length | 94            | 31           | 0.99         | 1.31                  |
| Stacks    | Only indels, short-long length | 90            | opt          | 0.99         | 1.28                  |
| Stacks    | Only indels, short-long length | 98            | opt          | 0.99         | 1.34                  |
| Stacks    | Only indels, short-long length | 94            | opt          | 0.99         | 1.31                  |
| VSEARCH   | Only indels, short-long length | 90            | 15           | 0.96         | 2.06                  |
| VSEARCH   | Only indels, short-long length | 90            | 8            | 0.96         | 0.97                  |
| VSEARCH   | Only indels, short-long length | 94            | 15           | 0.98         | 2.10                  |
| VSEARCH   | Only indels, short-long length | 94            | 8            | 0.98         | 1.00                  |
| VSEARCH   | Only indels, short-long length | 98            | 15           | 1.00         | 2.38                  |
| VSEARCH   | Only indels, short-long length | 98            | 8            | 1.00         | 1.29                  |
| Velvet    | Only indels, short-long length | 98            | 15           | 0.59         | 1.01                  |
| Velvet    | Only indels, short-long length | 94            | 15           | 0.59         | 1.01                  |
| Velvet    | Only indels, short-long length | 90            | 15           | 0.61         | 1.00                  |

Continued on next page

Table S2 – continued from previous page

| Assembler | Simulation                     | Percent match | K-mer length | Completeness | Contig/Fragment Ratio |
|-----------|--------------------------------|---------------|--------------|--------------|-----------------------|
| Velvet    | Only indels, short-long length | 98            | 31           | 0.77         | 0.83                  |
| Velvet    | Only indels, short-long length | 94            | 31           | 0.78         | 0.85                  |
| Velvet    | Only indels, short-long length | 90            | 31           | 0.80         | 0.89                  |
| Stacks2   | Only indels, short-long length | 94            | 31           | 0.63         | 0.97                  |
| Stacks2   | Only indels, short-long length | 98            | 31           | 0.64         | 0.99                  |
| Stacks2   | Only indels, short-long length | 90            | opt          | 0.62         | 0.96                  |
| Stacks2   | Only indels, short-long length | 94            | 15           | 0.63         | 0.97                  |
| Stacks2   | Only indels, short-long length | 98            | 15           | 0.64         | 0.99                  |
| Stacks2   | Only indels, short-long length | 90            | 15           | 0.62         | 0.96                  |
| Stacks2   | Only indels, short-long length | 94            | opt          | 0.63         | 0.97                  |
| Stacks2   | Only indels, short-long length | 98            | opt          | 0.64         | 0.99                  |
| Stacks2   | Only indels, short-long length | 90            | 31           | 0.62         | 0.97                  |

Table S3: Assembler results for all simulations derived from the *H. sapiens* genome. Simulations were used to explore the impact of the number of mutations (overall and per locus), the proportion of mutations that were indels and the size of indels, on assembly performance across five different assemblers (i.e., CD-HIT, Stacks, Stacks2, VSEARCH, and Velvet), with varying percent match and k-mer lengths (when appropriate). Detailed descriptions of each simulation can be found in Table 1 of the main text. Assembly results were compared using two different metrics, the proportion of contigs that match genome fragments (completeness) and over-under assembly ratio (contigs:fragments). The completeness proportion includes exact sequence matches as well as close matches (see main text methods for clarification). K-mer length is left blank in the case of CD-HIT entries, because CD-HIT does not use k-mer length as a parameter setting.

| Assembler | Simulation      | Percent match | K-mer length | Completeness | Contig/Fragment Ratio |
|-----------|-----------------|---------------|--------------|--------------|-----------------------|
| CD-HIT    | Original Genome | 94            | -            | 0.92         | 0.92                  |
| CD-HIT    | Original Genome | 98            | -            | 0.98         | 0.98                  |
| CD-HIT    | Original Genome | 90            | -            | 0.88         | 0.88                  |
| Stacks    | Original Genome | 90            | 15           | 0.96         | 0.96                  |
| Stacks    | Original Genome | 98            | 15           | 0.96         | 0.97                  |
| Stacks    | Original Genome | 94            | 15           | 0.96         | 0.96                  |
| Stacks    | Original Genome | 90            | 31           | 0.96         | 0.96                  |
| Stacks    | Original Genome | 98            | 31           | 0.96         | 0.97                  |
| Stacks    | Original Genome | 94            | 31           | 0.96         | 0.96                  |
| Stacks    | Original Genome | 90            | opt          | 0.96         | 0.96                  |
| Stacks    | Original Genome | 98            | opt          | 0.96         | 0.97                  |
| Stacks    | Original Genome | 94            | opt          | 0.96         | 0.96                  |
| VSEARCH   | Original Genome | 90            | 15           | 0.88         | 3.98                  |
| VSEARCH   | Original Genome | 90            | 8            | 0.88         | 3.52                  |
| VSEARCH   | Original Genome | 94            | 15           | 0.92         | 4.03                  |
| VSEARCH   | Original Genome | 94            | 8            | 0.92         | 3.56                  |
| VSEARCH   | Original Genome | 98            | 15           | 0.98         | 4.09                  |
| VSEARCH   | Original Genome | 98            | 8            | 0.98         | 3.62                  |
| Velvet    | Original Genome | 98            | 15           | 0.17         | 0.93                  |
| Velvet    | Original Genome | 94            | 15           | 0.17         | 0.93                  |
| Velvet    | Original Genome | 90            | 15           | 0.17         | 0.91                  |
| Velvet    | Original Genome | 98            | 31           | 0.76         | 0.77                  |
| Velvet    | Original Genome | 94            | 31           | 0.76         | 0.77                  |
| Velvet    | Original Genome | 90            | 31           | 0.76         | 0.77                  |
| Stacks2   | Original Genome | 94            | 15           | 0.92         | 0.93                  |
| Stacks2   | Original Genome | 94            | 31           | 0.91         | 0.92                  |
| Stacks2   | Original Genome | 98            | 15           | 0.95         | 0.96                  |
| Stacks2   | Original Genome | 98            | opt          | 0.96         | 0.96                  |
| Stacks2   | Original Genome | 94            | opt          | 0.92         | 0.92                  |
| Stacks2   | Original Genome | 90            | opt          | 0.91         | 0.92                  |
| Stacks2   | Original Genome | 90            | 31           | 0.89         | 0.91                  |
| Stacks2   | Original Genome | 90            | 15           | 0.92         | 0.93                  |
| Stacks2   | Original Genome | 98            | 31           | 0.95         | 0.96                  |
| CD-HIT    | A few SNPs      | 94            | -            | 0.92         | 0.92                  |
| CD-HIT    | A few SNPs      | 98            | -            | 0.98         | 1.02                  |

Continued on next page

Table S3 – continued from previous page

| Assembler | Simulation | Percent match | K-mer length | Completeness | Contig/Fragment Ratio |
|-----------|------------|---------------|--------------|--------------|-----------------------|
| CD-HIT    | A few SNPs | 90            | -            | 0.87         | 0.87                  |
| Stacks    | A few SNPs | 90            | 15           | 0.94         | 0.95                  |
| Stacks    | A few SNPs | 98            | 15           | 0.95         | 0.96                  |
| Stacks    | A few SNPs | 94            | 15           | 0.95         | 0.95                  |
| Stacks    | A few SNPs | 90            | 31           | 0.95         | 0.95                  |
| Stacks    | A few SNPs | 98            | 31           | 0.95         | 0.96                  |
| Stacks    | A few SNPs | 94            | 31           | 0.95         | 0.95                  |
| Stacks    | A few SNPs | 90            | opt          | 0.94         | 0.95                  |
| Stacks    | A few SNPs | 98            | opt          | 0.95         | 0.96                  |
| Stacks    | A few SNPs | 94            | opt          | 0.95         | 0.95                  |
| VSEARCH   | A few SNPs | 90            | 15           | 0.87         | 3.33                  |
| VSEARCH   | A few SNPs | 90            | 8            | 0.87         | 2.87                  |
| VSEARCH   | A few SNPs | 94            | 15           | 0.92         | 3.38                  |
| VSEARCH   | A few SNPs | 94            | 8            | 0.91         | 2.92                  |
| VSEARCH   | A few SNPs | 98            | 15           | 0.98         | 3.48                  |
| VSEARCH   | A few SNPs | 98            | 8            | 0.98         | 3.03                  |
| Velvet    | A few SNPs | 98            | 15           | 0.12         | 0.96                  |
| Velvet    | A few SNPs | 94            | 15           | 0.12         | 0.96                  |
| Velvet    | A few SNPs | 90            | 15           | 0.14         | 0.91                  |
| Velvet    | A few SNPs | 98            | 31           | 0.65         | 0.67                  |
| Velvet    | A few SNPs | 94            | 31           | 0.72         | 0.73                  |
| Velvet    | A few SNPs | 90            | 31           | 0.72         | 0.73                  |
| Stacks2   | A few SNPs | 90            | 31           | 0.87         | 0.89                  |
| Stacks2   | A few SNPs | 94            | 15           | 0.89         | 0.90                  |
| Stacks2   | A few SNPs | 90            | opt          | 0.86         | 0.88                  |
| Stacks2   | A few SNPs | 98            | 15           | 0.94         | 0.95                  |
| Stacks2   | A few SNPs | 98            | opt          | 0.94         | 0.95                  |
| Stacks2   | A few SNPs | 94            | 31           | 0.89         | 0.90                  |
| Stacks2   | A few SNPs | 98            | 31           | 0.94         | 0.95                  |
| Stacks2   | A few SNPs | 94            | opt          | 0.89         | 0.90                  |
| Stacks2   | A few SNPs | 90            | 15           | 0.86         | 0.88                  |
| CD-HIT    | More SNPs  | 94            | -            | 0.92         | 0.92                  |
| CD-HIT    | More SNPs  | 98            | -            | 0.98         | 1.02                  |
| CD-HIT    | More SNPs  | 90            | -            | 0.87         | 0.87                  |
| Stacks    | More SNPs  | 90            | 15           | 0.94         | 0.95                  |
| Stacks    | More SNPs  | 98            | 15           | 0.95         | 0.96                  |
| Stacks    | More SNPs  | 94            | 15           | 0.95         | 0.95                  |
| Stacks    | More SNPs  | 90            | 31           | 0.95         | 0.95                  |
| Stacks    | More SNPs  | 98            | 31           | 0.95         | 0.96                  |
| Stacks    | More SNPs  | 94            | 31           | 0.95         | 0.95                  |
| Stacks    | More SNPs  | 90            | opt          | 0.94         | 0.95                  |
| Stacks    | More SNPs  | 98            | opt          | 0.95         | 0.96                  |
| Stacks    | More SNPs  | 94            | opt          | 0.95         | 0.95                  |
| VSEARCH   | More SNPs  | 90            | 15           | 0.87         | 3.88                  |
| VSEARCH   | More SNPs  | 90            | 8            | 0.87         | 3.49                  |
| VSEARCH   | More SNPs  | 94            | 15           | 0.92         | 3.93                  |
| VSEARCH   | More SNPs  | 94            | 8            | 0.92         | 3.54                  |
| VSEARCH   | More SNPs  | 98            | 15           | 0.98         | 4.03                  |
| VSEARCH   | More SNPs  | 98            | 8            | 0.98         | 3.64                  |
| Velvet    | More SNPs  | 98            | 15           | 0.11         | 0.96                  |

Continued on next page



Table S3 – continued from previous page

| Assembler | Simulation               | Percent match | K-mer length | Completeness | Contig/Fragment Ratio |
|-----------|--------------------------|---------------|--------------|--------------|-----------------------|
| Velvet    | More SNPs                | 94            | 15           | 0.11         | 0.96                  |
| Velvet    | More SNPs                | 90            | 15           | 0.14         | 0.91                  |
| Velvet    | More SNPs                | 98            | 31           | 0.65         | 0.66                  |
| Velvet    | More SNPs                | 94            | 31           | 0.72         | 0.73                  |
| Velvet    | More SNPs                | 90            | 31           | 0.72         | 0.73                  |
| Stacks2   | More SNPs                | 90            | 31           | 0.87         | 0.89                  |
| Stacks2   | More SNPs                | 94            | 15           | 0.89         | 0.90                  |
| Stacks2   | More SNPs                | 98            | 31           | 0.94         | 0.95                  |
| Stacks2   | More SNPs                | 94            | 31           | 0.89         | 0.90                  |
| Stacks2   | More SNPs                | 98            | opt          | 0.94         | 0.95                  |
| Stacks2   | More SNPs                | 90            | opt          | 0.86         | 0.88                  |
| Stacks2   | More SNPs                | 98            | 15           | 0.94         | 0.95                  |
| Stacks2   | More SNPs                | 94            | opt          | 0.89         | 0.89                  |
| Stacks2   | More SNPs                | 90            | 15           | 0.86         | 0.88                  |
| CD-HIT    | Multiple SNPs per locus  | 94            | -            | 0.92         | 0.92                  |
| CD-HIT    | Multiple SNPs per locus  | 98            | -            | 0.98         | 1.08                  |
| CD-HIT    | Multiple SNPs per locus  | 90            | -            | 0.87         | 0.87                  |
| Stacks    | Multiple SNPs per locus  | 90            | 15           | 0.94         | 0.95                  |
| Stacks    | Multiple SNPs per locus  | 98            | 15           | 0.95         | 0.97                  |
| Stacks    | Multiple SNPs per locus  | 94            | 15           | 0.94         | 0.95                  |
| Stacks    | Multiple SNPs per locus  | 90            | 31           | 0.94         | 0.95                  |
| Stacks    | Multiple SNPs per locus  | 98            | 31           | 0.95         | 0.97                  |
| Stacks    | Multiple SNPs per locus  | 94            | 31           | 0.94         | 0.95                  |
| Stacks    | Multiple SNPs per locus  | 90            | opt          | 0.94         | 0.95                  |
| Stacks    | Multiple SNPs per locus  | 98            | opt          | 0.95         | 0.97                  |
| Stacks    | Multiple SNPs per locus  | 94            | opt          | 0.94         | 0.95                  |
| VSEARCH   | Multiple SNPs per locus  | 90            | 15           | 0.87         | 3.91                  |
| VSEARCH   | Multiple SNPs per locus  | 90            | 8            | 0.87         | 3.45                  |
| VSEARCH   | Multiple SNPs per locus  | 94            | 15           | 0.92         | 3.96                  |
| VSEARCH   | Multiple SNPs per locus  | 94            | 8            | 0.92         | 3.50                  |
| VSEARCH   | Multiple SNPs per locus  | 98            | 15           | 0.98         | 4.12                  |
| VSEARCH   | Multiple SNPs per locus  | 98            | 8            | 0.98         | 3.66                  |
| Velvet    | Multiple SNPs per locus  | 98            | 15           | 0.10         | 0.97                  |
| Velvet    | Multiple SNPs per locus  | 94            | 15           | 0.10         | 0.97                  |
| Velvet    | Multiple SNPs per locus  | 90            | 15           | 0.13         | 0.91                  |
| Velvet    | Multiple SNPs per locus  | 98            | 31           | 0.62         | 0.64                  |
| Velvet    | Multiple SNPs per locus  | 94            | 31           | 0.71         | 0.72                  |
| Velvet    | Multiple SNPs per locus  | 90            | 31           | 0.71         | 0.73                  |
| Stacks2   | Multiple SNPs per locus  | 98            | 31           | 0.94         | 0.96                  |
| Stacks2   | Multiple SNPs per locus  | 90            | 15           | 0.86         | 0.87                  |
| Stacks2   | Multiple SNPs per locus  | 98            | opt          | 0.94         | 0.96                  |
| Stacks2   | Multiple SNPs per locus  | 90            | opt          | 0.86         | 0.87                  |
| Stacks2   | Multiple SNPs per locus  | 94            | 31           | 0.89         | 0.90                  |
| Stacks2   | Multiple SNPs per locus  | 90            | 31           | 0.87         | 0.89                  |
| Stacks2   | Multiple SNPs per locus  | 94            | 15           | 0.88         | 0.89                  |
| Stacks2   | Multiple SNPs per locus  | 94            | opt          | 0.89         | 0.90                  |
| Stacks2   | Multiple SNPs per locus  | 98            | 15           | 0.94         | 0.96                  |
| CD-HIT    | Mostly SNPs + few indels | 94            | -            | 0.92         | 0.92                  |
| CD-HIT    | Mostly SNPs + few indels | 98            | -            | 0.98         | 1.03                  |
| CD-HIT    | Mostly SNPs + few indels | 90            | -            | 0.87         | 0.87                  |

Continued on next page

Table S3 – continued from previous page

| Assembler | Simulation               | Percent match | K-mer length | Completeness | Contig/Fragment Ratio |
|-----------|--------------------------|---------------|--------------|--------------|-----------------------|
| Stacks    | Mostly SNPs + few indels | 90            | 15           | 0.95         | 0.98                  |
| Stacks    | Mostly SNPs + few indels | 98            | 15           | 0.96         | 1.00                  |
| Stacks    | Mostly SNPs + few indels | 94            | 15           | 0.95         | 0.99                  |
| Stacks    | Mostly SNPs + few indels | 90            | 31           | 0.95         | 0.98                  |
| Stacks    | Mostly SNPs + few indels | 98            | 31           | 0.95         | 1.00                  |
| Stacks    | Mostly SNPs + few indels | 94            | 31           | 0.95         | 0.99                  |
| Stacks    | Mostly SNPs + few indels | 90            | opt          | 0.95         | 0.98                  |
| Stacks    | Mostly SNPs + few indels | 98            | opt          | 0.96         | 1.00                  |
| Stacks    | Mostly SNPs + few indels | 94            | opt          | 0.95         | 0.99                  |
| VSEARCH   | Mostly SNPs + few indels | 90            | 15           | 0.87         | 3.89                  |
| VSEARCH   | Mostly SNPs + few indels | 90            | 8            | 0.87         | 3.51                  |
| VSEARCH   | Mostly SNPs + few indels | 94            | 15           | 0.92         | 3.93                  |
| VSEARCH   | Mostly SNPs + few indels | 94            | 8            | 0.92         | 3.56                  |
| VSEARCH   | Mostly SNPs + few indels | 98            | 15           | 0.98         | 4.04                  |
| VSEARCH   | Mostly SNPs + few indels | 98            | 8            | 0.98         | 3.67                  |
| Velvet    | Mostly SNPs + few indels | 98            | 15           | 0.11         | 0.96                  |
| Velvet    | Mostly SNPs + few indels | 94            | 15           | 0.11         | 0.96                  |
| Velvet    | Mostly SNPs + few indels | 90            | 15           | 0.14         | 0.91                  |
| Velvet    | Mostly SNPs + few indels | 98            | 31           | 0.65         | 0.67                  |
| Velvet    | Mostly SNPs + few indels | 94            | 31           | 0.72         | 0.73                  |
| Velvet    | Mostly SNPs + few indels | 90            | 31           | 0.72         | 0.73                  |
| Stacks2   | Mostly SNPs + few indels | 90            | opt          | 0.83         | 0.88                  |
| Stacks2   | Mostly SNPs + few indels | 94            | opt          | 0.85         | 0.90                  |
| Stacks2   | Mostly SNPs + few indels | 98            | opt          | 0.90         | 0.95                  |
| Stacks2   | Mostly SNPs + few indels | 94            | 15           | 0.85         | 0.90                  |
| Stacks2   | Mostly SNPs + few indels | 98            | 31           | 0.90         | 0.95                  |
| Stacks2   | Mostly SNPs + few indels | 98            | 15           | 0.90         | 0.95                  |
| Stacks2   | Mostly SNPs + few indels | 94            | 31           | 0.86         | 0.90                  |
| Stacks2   | Mostly SNPs + few indels | 90            | 31           | 0.84         | 0.89                  |
| Stacks2   | Mostly SNPs + few indels | 90            | 15           | 0.83         | 0.88                  |
| CD-HIT    | 50:50 SNPs:indels        | 94            | -            | 0.92         | 0.92                  |
| CD-HIT    | 50:50 SNPs:indels        | 98            | -            | 0.98         | 1.02                  |
| CD-HIT    | 50:50 SNPs:indels        | 90            | -            | 0.87         | 0.87                  |
| Stacks    | 50:50 SNPs:indels        | 90            | 15           | 0.95         | 1.09                  |
| Stacks    | 50:50 SNPs:indels        | 98            | 15           | 0.96         | 1.14                  |
| Stacks    | 50:50 SNPs:indels        | 94            | 15           | 0.95         | 1.11                  |
| Stacks    | 50:50 SNPs:indels        | 90            | 31           | 0.95         | 1.10                  |
| Stacks    | 50:50 SNPs:indels        | 98            | 31           | 0.96         | 1.14                  |
| Stacks    | 50:50 SNPs:indels        | 94            | 31           | 0.95         | 1.11                  |
| Stacks    | 50:50 SNPs:indels        | 90            | opt          | 0.95         | 1.09                  |
| Stacks    | 50:50 SNPs:indels        | 98            | opt          | 0.96         | 1.14                  |
| Stacks    | 50:50 SNPs:indels        | 94            | opt          | 0.95         | 1.11                  |
| VSEARCH   | 50:50 SNPs:indels        | 90            | 15           | 0.87         | 3.91                  |
| VSEARCH   | 50:50 SNPs:indels        | 90            | 8            | 0.87         | 3.45                  |
| VSEARCH   | 50:50 SNPs:indels        | 94            | 15           | 0.92         | 3.96                  |
| VSEARCH   | 50:50 SNPs:indels        | 94            | 8            | 0.92         | 3.50                  |
| VSEARCH   | 50:50 SNPs:indels        | 98            | 15           | 0.98         | 4.07                  |
| VSEARCH   | 50:50 SNPs:indels        | 98            | 8            | 0.98         | 3.62                  |
| Velvet    | 50:50 SNPs:indels        | 98            | 15           | 0.11         | 0.93                  |
| Velvet    | 50:50 SNPs:indels        | 94            | 15           | 0.11         | 0.93                  |

Continued on next page

Table S3 – continued from previous page

| Assembler | Simulation                    | Percent match | K-mer length | Completeness | Contig/Fragment Ratio |
|-----------|-------------------------------|---------------|--------------|--------------|-----------------------|
| Velvet    | 50:50 SNPs:indels             | 90            | 15           | 0.13         | 0.91                  |
| Velvet    | 50:50 SNPs:indels             | 98            | 31           | 0.63         | 0.67                  |
| Velvet    | 50:50 SNPs:indels             | 94            | 31           | 0.68         | 0.73                  |
| Velvet    | 50:50 SNPs:indels             | 90            | 31           | 0.69         | 0.73                  |
| Stacks2   | 50:50 SNPs:indels             | 98            | opt          | 0.77         | 0.95                  |
| Stacks2   | 50:50 SNPs:indels             | 98            | 15           | 0.77         | 0.95                  |
| Stacks2   | 50:50 SNPs:indels             | 94            | 15           | 0.73         | 0.90                  |
| Stacks2   | 50:50 SNPs:indels             | 90            | 15           | 0.71         | 0.89                  |
| Stacks2   | 50:50 SNPs:indels             | 90            | opt          | 0.71         | 0.89                  |
| Stacks2   | 50:50 SNPs:indels             | 98            | 31           | 0.77         | 0.95                  |
| Stacks2   | 50:50 SNPs:indels             | 94            | 31           | 0.73         | 0.91                  |
| Stacks2   | 50:50 SNPs:indels             | 94            | opt          | 0.73         | 0.91                  |
| Stacks2   | 50:50 SNPs:indels             | 90            | 31           | 0.72         | 0.90                  |
| CD-HIT    | Only indels                   | 94            | -            | 0.92         | 0.92                  |
| CD-HIT    | Only indels                   | 98            | -            | 0.98         | 1.01                  |
| CD-HIT    | Only indels                   | 90            | -            | 0.87         | 0.87                  |
| Stacks    | Only indels                   | 90            | 15           | 0.96         | 1.23                  |
| Stacks    | Only indels                   | 98            | 15           | 0.97         | 1.30                  |
| Stacks    | Only indels                   | 94            | 15           | 0.96         | 1.26                  |
| Stacks    | Only indels                   | 90            | 31           | 0.96         | 1.23                  |
| Stacks    | Only indels                   | 98            | 31           | 0.97         | 1.30                  |
| Stacks    | Only indels                   | 94            | 31           | 0.96         | 1.26                  |
| Stacks    | Only indels                   | 90            | opt          | 0.96         | 1.23                  |
| Stacks    | Only indels                   | 98            | opt          | 0.97         | 1.30                  |
| Stacks    | Only indels                   | 94            | opt          | 0.96         | 1.26                  |
| VSEARCH   | Only indels                   | 90            | 15           | 0.87         | 3.83                  |
| VSEARCH   | Only indels                   | 90            | 8            | 0.87         | 3.41                  |
| VSEARCH   | Only indels                   | 94            | 15           | 0.92         | 3.88                  |
| VSEARCH   | Only indels                   | 94            | 8            | 0.92         | 3.46                  |
| VSEARCH   | Only indels                   | 98            | 15           | 0.98         | 3.99                  |
| VSEARCH   | Only indels                   | 98            | 8            | 0.98         | 3.58                  |
| Velvet    | Only indels                   | 98            | 15           | 0.11         | 0.91                  |
| Velvet    | Only indels                   | 94            | 15           | 0.11         | 0.91                  |
| Velvet    | Only indels                   | 90            | 15           | 0.12         | 0.90                  |
| Velvet    | Only indels                   | 98            | 31           | 0.61         | 0.66                  |
| Velvet    | Only indels                   | 94            | 31           | 0.65         | 0.73                  |
| Velvet    | Only indels                   | 90            | 31           | 0.65         | 0.73                  |
| Stacks2   | Only indels                   | 90            | 31           | 0.58         | 0.91                  |
| Stacks2   | Only indels                   | 94            | 15           | 0.59         | 0.92                  |
| Stacks2   | Only indels                   | 94            | 31           | 0.59         | 0.92                  |
| Stacks2   | Only indels                   | 94            | opt          | 0.59         | 0.92                  |
| Stacks2   | Only indels                   | 98            | 31           | 0.62         | 0.96                  |
| Stacks2   | Only indels                   | 98            | opt          | 0.62         | 0.96                  |
| Stacks2   | Only indels                   | 90            | 15           | 0.57         | 0.90                  |
| Stacks2   | Only indels                   | 98            | 15           | 0.62         | 0.96                  |
| Stacks2   | Only indels                   | 90            | opt          | 0.57         | 0.90                  |
| CD-HIT    | Only indels, short-mid length | 94            | -            | 0.92         | 0.93                  |
| CD-HIT    | Only indels, short-mid length | 98            | -            | 0.99         | 1.22                  |
| CD-HIT    | Only indels, short-mid length | 90            | -            | 0.87         | 0.87                  |
| Stacks    | Only indels, short-mid length | 90            | 15           | 0.96         | 1.23                  |

Continued on next page

Table S3 – continued from previous page

| Assembler | Simulation                     | Percent match | K-mer length | Completeness | Contig/Fragment Ratio |
|-----------|--------------------------------|---------------|--------------|--------------|-----------------------|
| Stacks    | Only indels, short-mid length  | 98            | 15           | 0.97         | 1.30                  |
| Stacks    | Only indels, short-mid length  | 94            | 15           | 0.96         | 1.26                  |
| Stacks    | Only indels, short-mid length  | 90            | 31           | 0.96         | 1.24                  |
| Stacks    | Only indels, short-mid length  | 98            | 31           | 0.97         | 1.30                  |
| Stacks    | Only indels, short-mid length  | 94            | 31           | 0.96         | 1.26                  |
| Stacks    | Only indels, short-mid length  | 90            | opt          | 0.96         | 1.23                  |
| Stacks    | Only indels, short-mid length  | 98            | opt          | 0.97         | 1.30                  |
| Stacks    | Only indels, short-mid length  | 94            | opt          | 0.96         | 1.26                  |
| VSEARCH   | Only indels, short-mid length  | 90            | 15           | 0.88         | 3.92                  |
| VSEARCH   | Only indels, short-mid length  | 90            | 8            | 0.87         | 3.50                  |
| VSEARCH   | Only indels, short-mid length  | 94            | 15           | 0.92         | 3.98                  |
| VSEARCH   | Only indels, short-mid length  | 94            | 8            | 0.92         | 3.56                  |
| VSEARCH   | Only indels, short-mid length  | 98            | 15           | 0.98         | 4.27                  |
| VSEARCH   | Only indels, short-mid length  | 98            | 8            | 0.98         | 3.85                  |
| Velvet    | Only indels, short-mid length  | 98            | 15           | 0.11         | 0.93                  |
| Velvet    | Only indels, short-mid length  | 94            | 15           | 0.11         | 0.93                  |
| Velvet    | Only indels, short-mid length  | 90            | 15           | 0.12         | 0.92                  |
| Velvet    | Only indels, short-mid length  | 98            | 31           | 0.61         | 0.67                  |
| Velvet    | Only indels, short-mid length  | 94            | 31           | 0.63         | 0.69                  |
| Velvet    | Only indels, short-mid length  | 90            | 31           | 0.65         | 0.73                  |
| Stacks2   | Only indels, short-mid length  | 90            | opt          | 0.58         | 0.90                  |
| Stacks2   | Only indels, short-mid length  | 98            | 31           | 0.62         | 0.96                  |
| Stacks2   | Only indels, short-mid length  | 94            | 31           | 0.59         | 0.92                  |
| Stacks2   | Only indels, short-mid length  | 90            | 15           | 0.57         | 0.90                  |
| Stacks2   | Only indels, short-mid length  | 90            | 31           | 0.58         | 0.91                  |
| Stacks2   | Only indels, short-mid length  | 98            | opt          | 0.63         | 0.96                  |
| Stacks2   | Only indels, short-mid length  | 94            | opt          | 0.59         | 0.92                  |
| Stacks2   | Only indels, short-mid length  | 94            | 15           | 0.59         | 0.91                  |
| Stacks2   | Only indels, short-mid length  | 98            | 15           | 0.63         | 0.96                  |
| CD-HIT    | Only indels, short-long length | 94            | -            | 0.93         | 0.95                  |
| CD-HIT    | Only indels, short-long length | 98            | -            | 0.99         | 1.26                  |
| CD-HIT    | Only indels, short-long length | 90            | -            | 0.88         | 0.88                  |
| Stacks    | Only indels, short-long length | 90            | 15           | 0.96         | 1.23                  |
| Stacks    | Only indels, short-long length | 98            | 15           | 0.98         | 1.30                  |
| Stacks    | Only indels, short-long length | 94            | 15           | 0.96         | 1.27                  |
| Stacks    | Only indels, short-long length | 90            | 31           | 0.96         | 1.24                  |
| Stacks    | Only indels, short-long length | 98            | 31           | 0.98         | 1.30                  |
| Stacks    | Only indels, short-long length | 94            | 31           | 0.96         | 1.27                  |
| Stacks    | Only indels, short-long length | 90            | opt          | 0.96         | 1.23                  |
| Stacks    | Only indels, short-long length | 98            | opt          | 0.98         | 1.30                  |
| Stacks    | Only indels, short-long length | 94            | opt          | 0.96         | 1.27                  |
| VSEARCH   | Only indels, short-long length | 90            | 15           | 0.88         | 3.99                  |
| VSEARCH   | Only indels, short-long length | 90            | 8            | 0.88         | 3.52                  |
| VSEARCH   | Only indels, short-long length | 94            | 15           | 0.93         | 4.06                  |
| VSEARCH   | Only indels, short-long length | 94            | 8            | 0.93         | 3.59                  |
| VSEARCH   | Only indels, short-long length | 98            | 15           | 0.99         | 4.37                  |
| VSEARCH   | Only indels, short-long length | 98            | 8            | 0.99         | 3.91                  |
| Velvet    | Only indels, short-long length | 98            | 15           | 0.11         | 0.94                  |
| Velvet    | Only indels, short-long length | 94            | 15           | 0.11         | 0.94                  |
| Velvet    | Only indels, short-long length | 90            | 15           | 0.12         | 0.93                  |

Continued on next page

Table S3 – continued from previous page

| Assembler | Simulation                     | Percent match | K-mer length | Completeness | Contig/Fragment Ratio |
|-----------|--------------------------------|---------------|--------------|--------------|-----------------------|
| Velvet    | Only indels, short-long length | 98            | 31           | 0.62         | 0.67                  |
| Velvet    | Only indels, short-long length | 94            | 31           | 0.62         | 0.69                  |
| Velvet    | Only indels, short-long length | 90            | 31           | 0.64         | 0.71                  |
| Stacks2   | Only indels, short-long length | 98            | opt          | 0.63         | 0.97                  |
| Stacks2   | Only indels, short-long length | 94            | 31           | 0.59         | 0.92                  |
| Stacks2   | Only indels, short-long length | 90            | opt          | 0.58         | 0.90                  |
| Stacks2   | Only indels, short-long length | 98            | 15           | 0.63         | 0.97                  |
| Stacks2   | Only indels, short-long length | 90            | 15           | 0.58         | 0.90                  |
| Stacks2   | Only indels, short-long length | 90            | 31           | 0.58         | 0.91                  |
| Stacks2   | Only indels, short-long length | 94            | 15           | 0.59         | 0.92                  |
| Stacks2   | Only indels, short-long length | 94            | opt          | 0.59         | 0.92                  |
| Stacks2   | Only indels, short-long length | 98            | 31           | 0.63         | 0.97                  |
